# Supplementary material for: Bond cleavage, fragment modification and reassembly in enantioselective three-component reactions
Source: PubMed Central journal article supplement — Nat Commun. 2015 Jan 14;6:5801. doi: 10.1038/ncomms6801 (PMC4309444; doi:10.1038/ncomms6801), 2015-01-14
Supplement: ncomms6801-s1.pdf [file ncomms6801-s1.pdf]

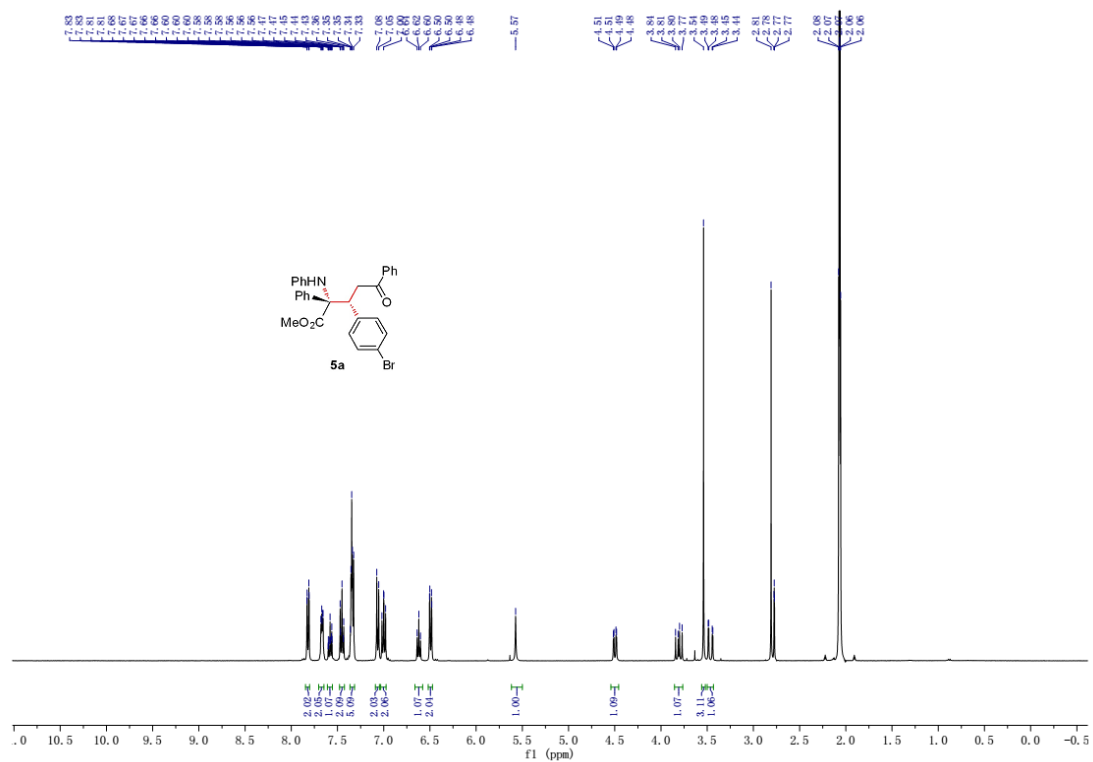

Supplementary Figure 1. <sup>1</sup>H NMR (400MHz, Acetone-d<sub>6</sub>) spectrum for 5a

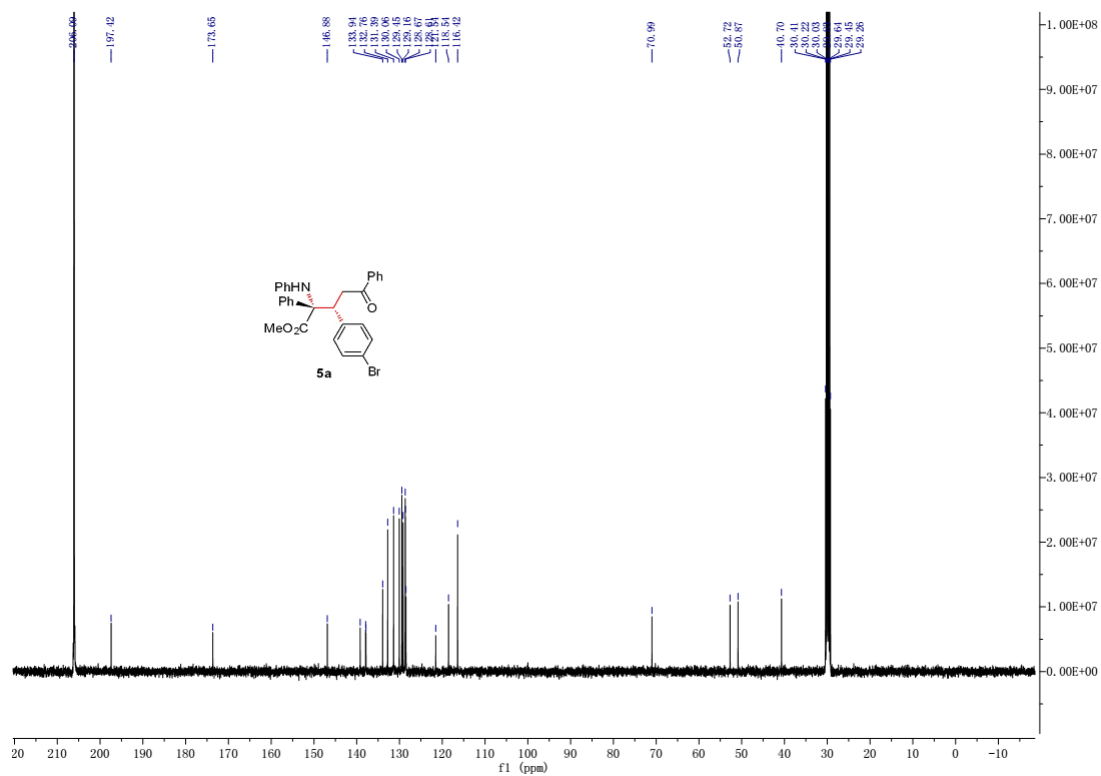

Supplementary Figure 2. <sup>13</sup>C NMR (100MHz, Acetone-d<sub>6</sub>) spectrum for 5a

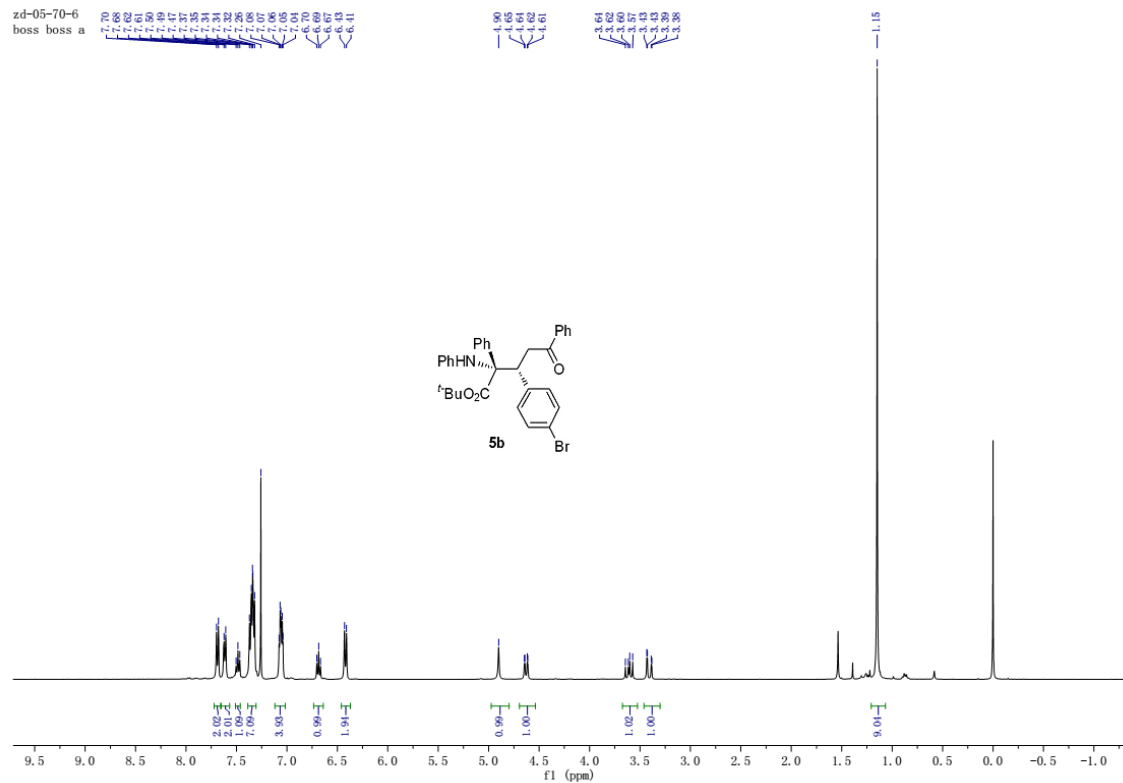

Supplementary Figure 3. <sup>1</sup>H NMR (400MHz, CDCl<sub>3</sub>) spectrum for **5b**

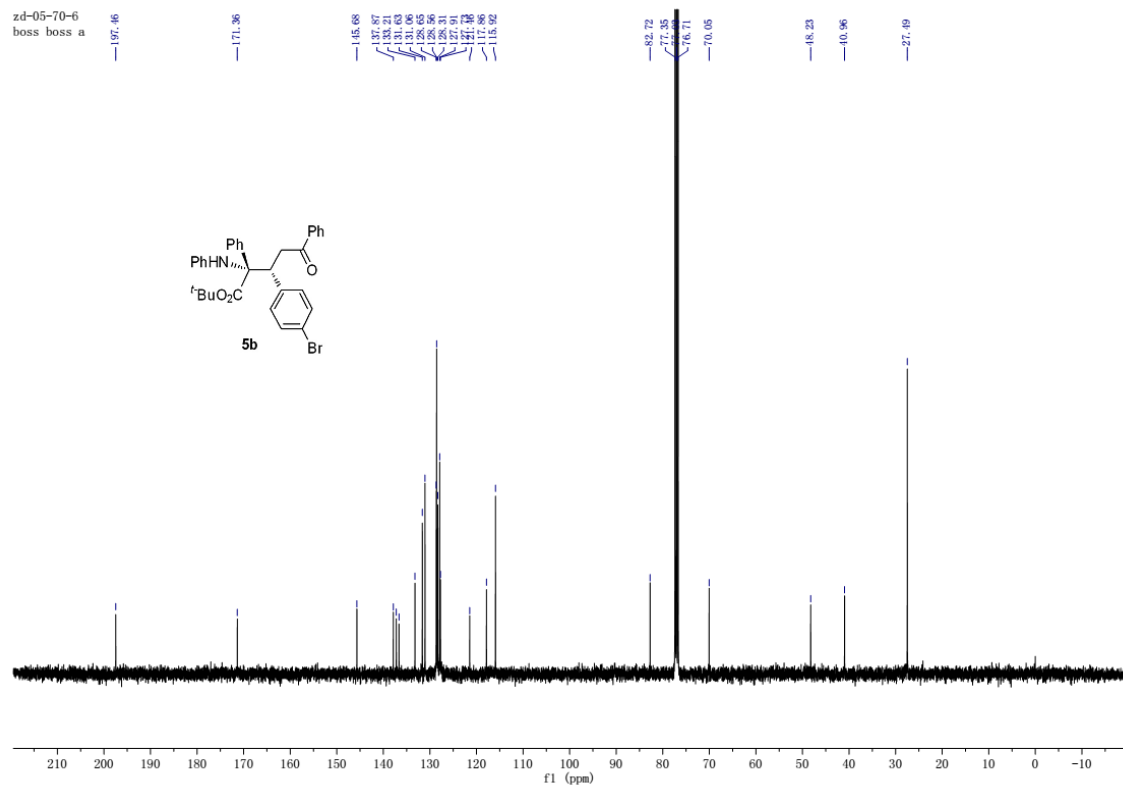

Supplementary Figure 4. <sup>13</sup>C NMR (100MHz, CDCl<sub>3</sub>) spectrum for **5b**

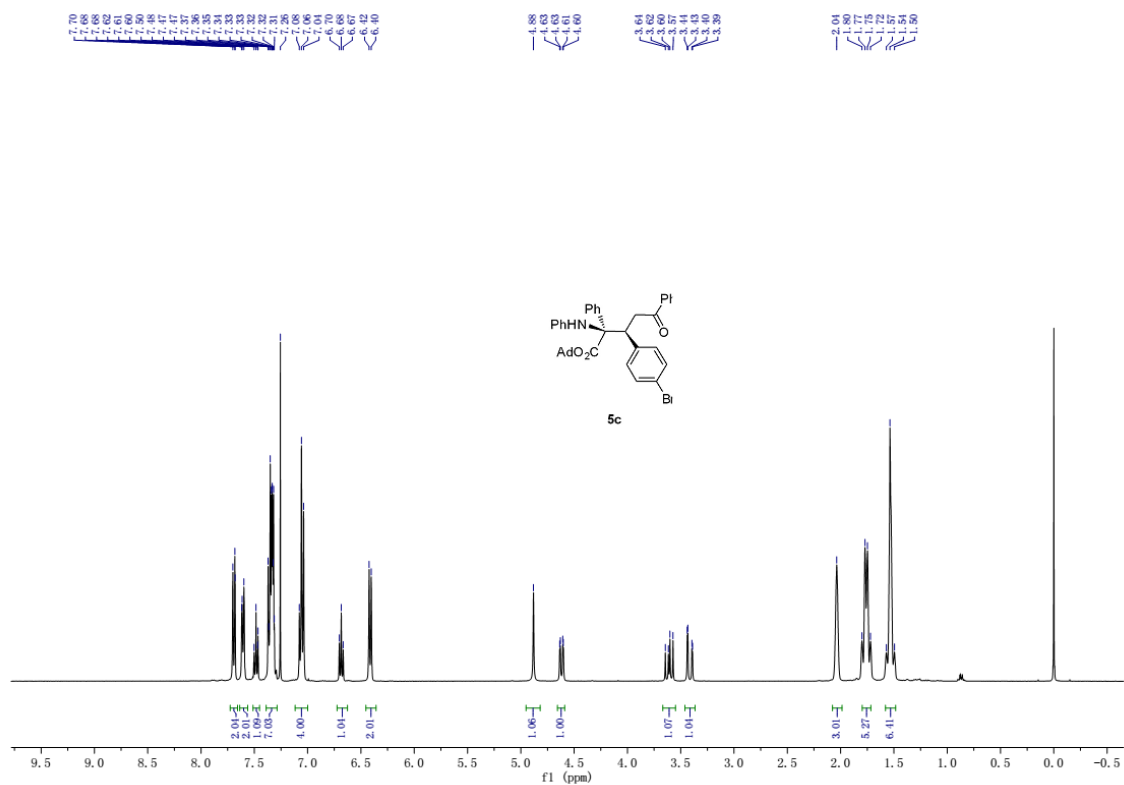

Supplementary Figure 5. <sup>1</sup>H NMR (400MHz, CDCl<sub>3</sub>) spectrum for **5c**

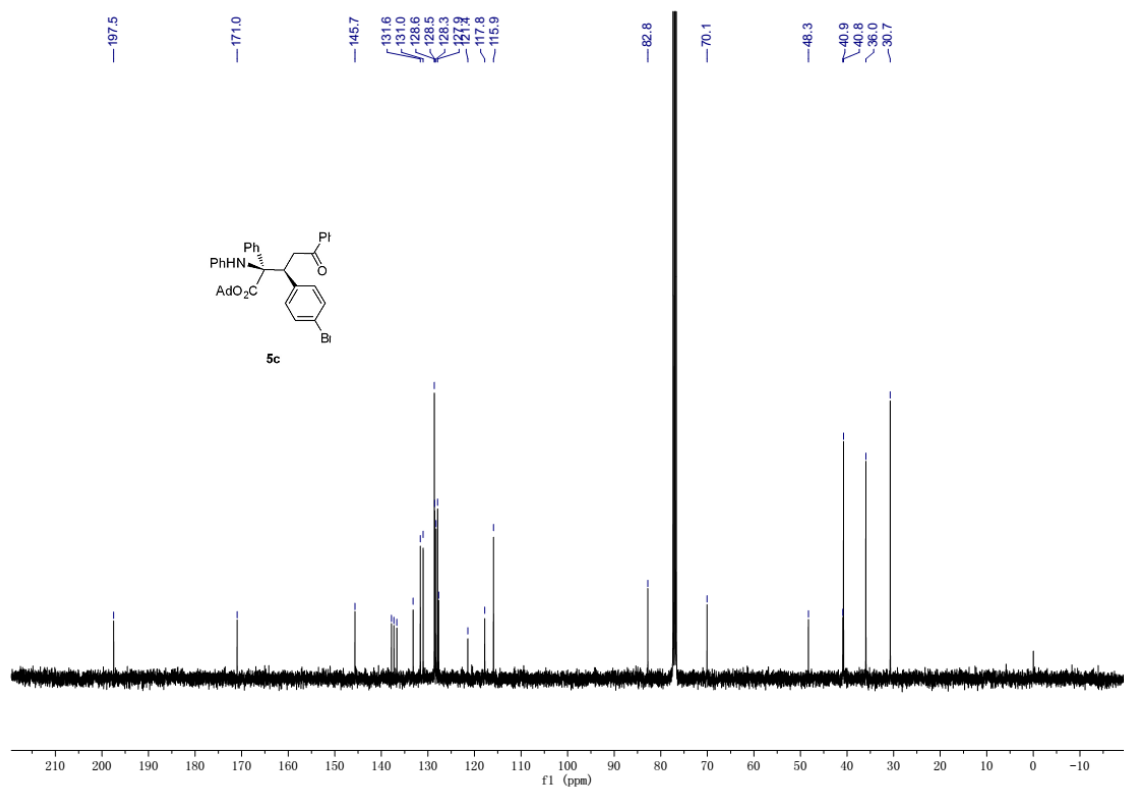

Supplementary Figure 6. <sup>13</sup>C NMR (100MHz, CDCl<sub>3</sub>) spectrum for **5c**

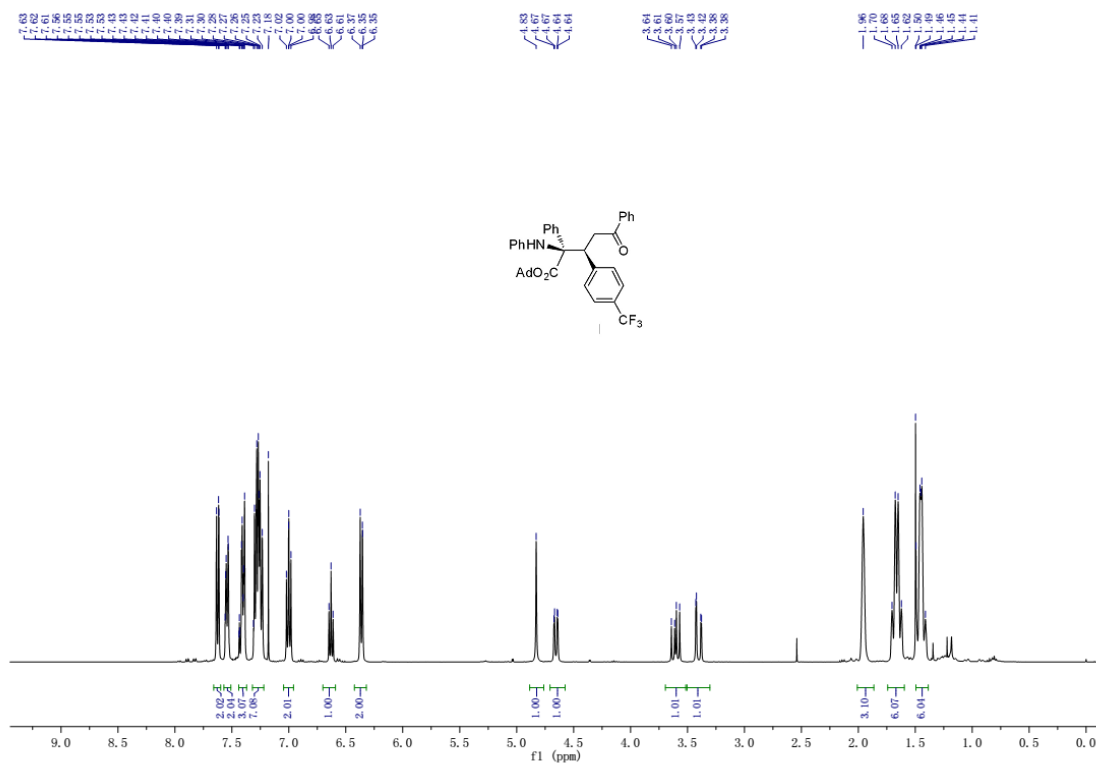

Supplementary Figure 7. <sup>1</sup>H NMR (400MHz, CDCl<sub>3</sub>) spectrum for 5d

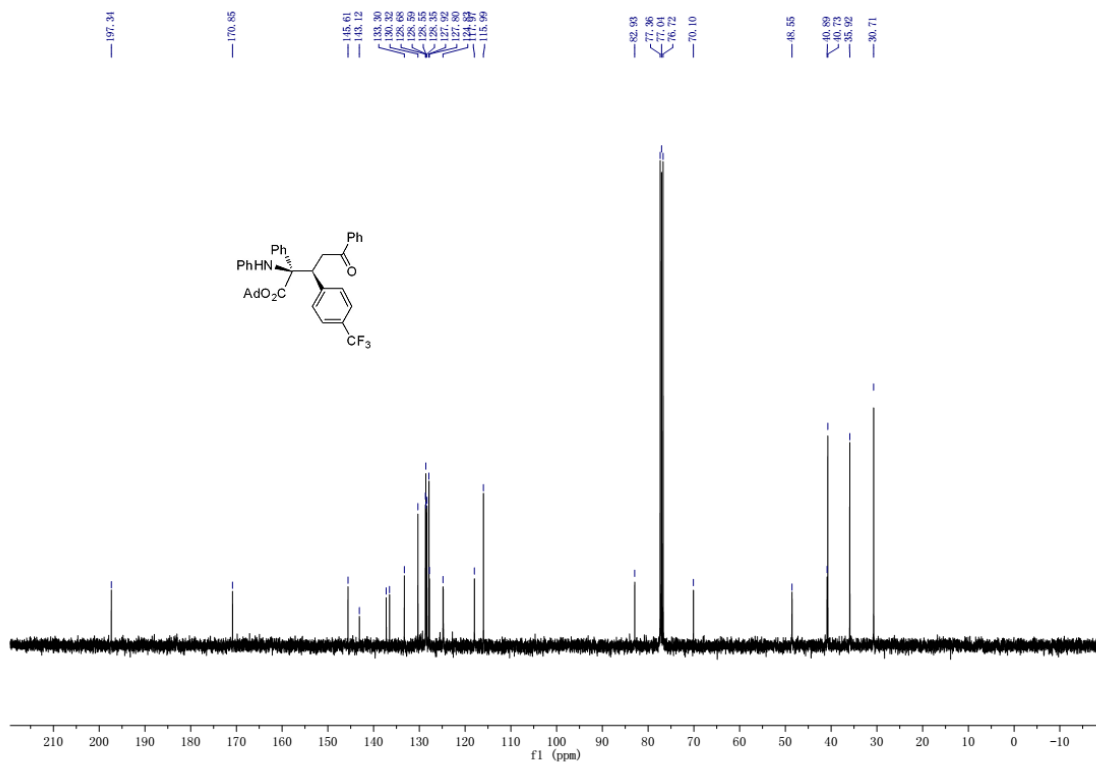

Supplementary Figure 8. <sup>13</sup>C NMR (100MHz, CDCl<sub>3</sub>) spectrum for 5d

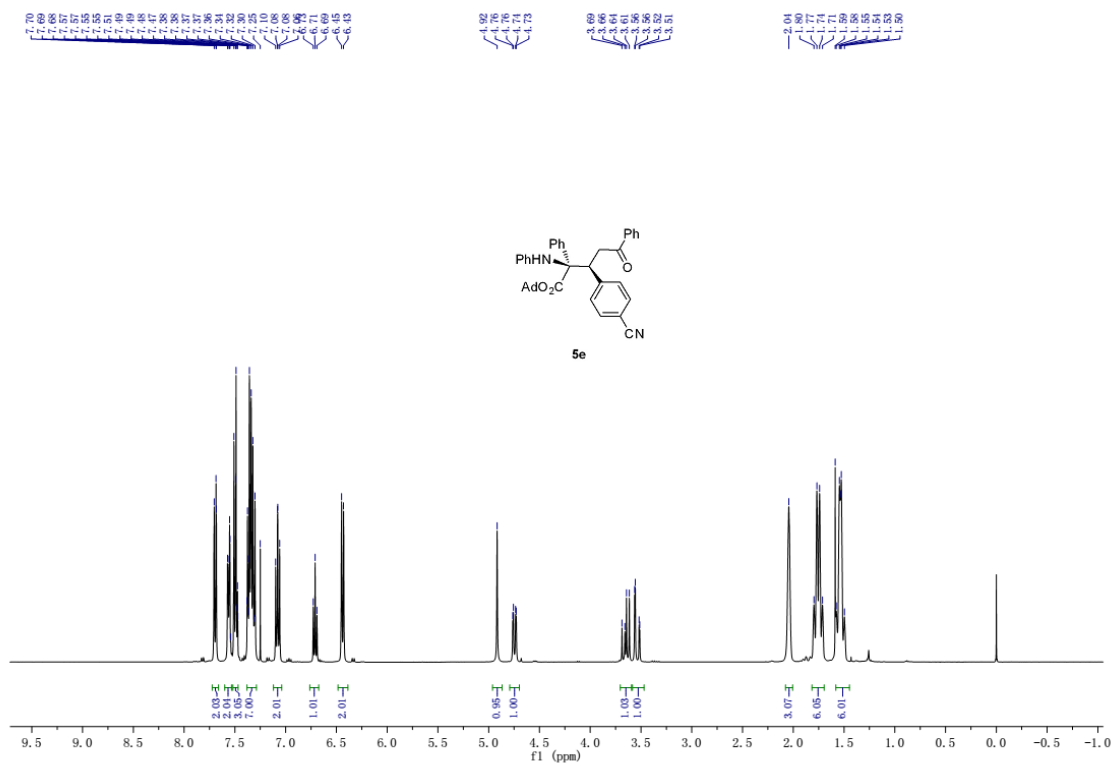

Supplementary Figure 9. <sup>1</sup>H NMR (400MHz, CDCl<sub>3</sub>) spectrum for 5e

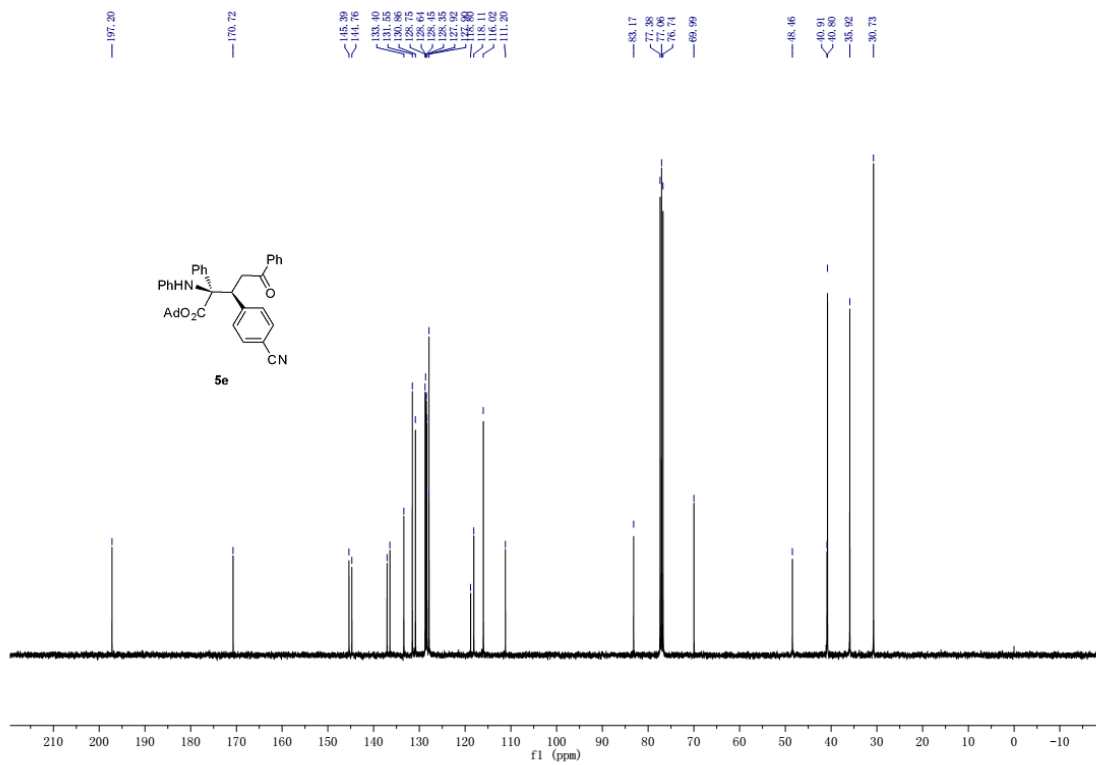

Supplementary Figure 10. <sup>13</sup>C NMR (100MHz, CDCl<sub>3</sub>) spectrum for 5e

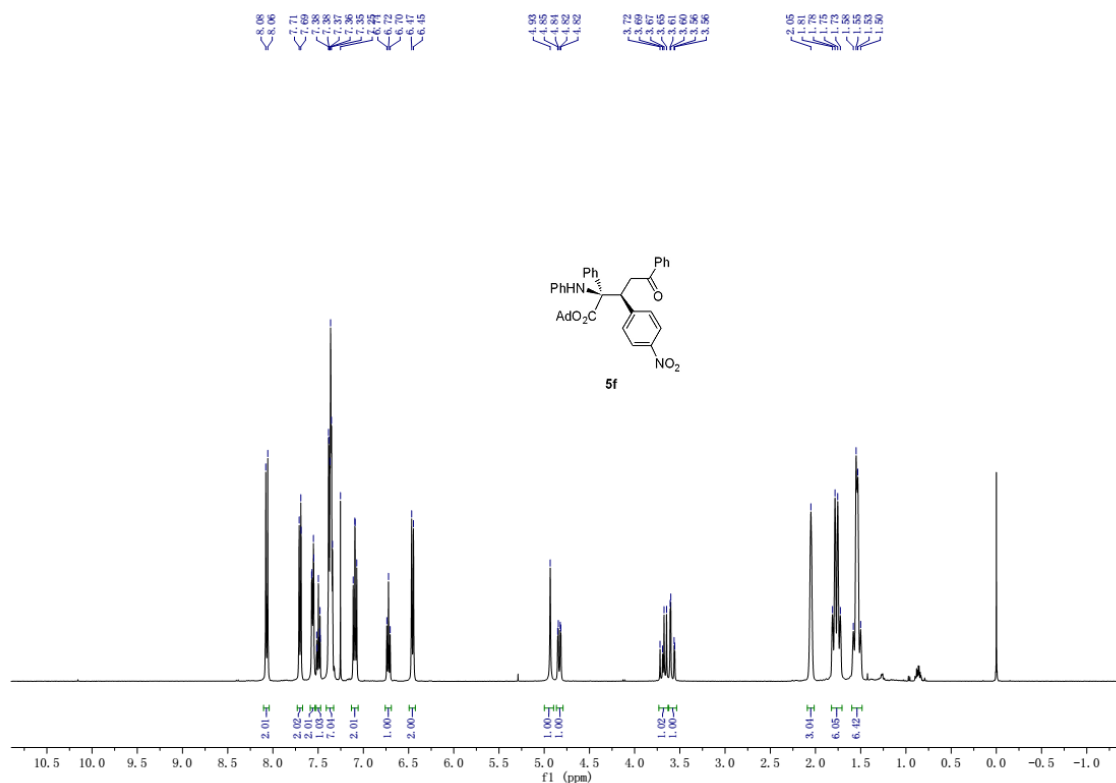

Supplementary Figure 11. <sup>1</sup>H NMR (400MHz, CDCl<sub>3</sub>) spectrum for **5f**

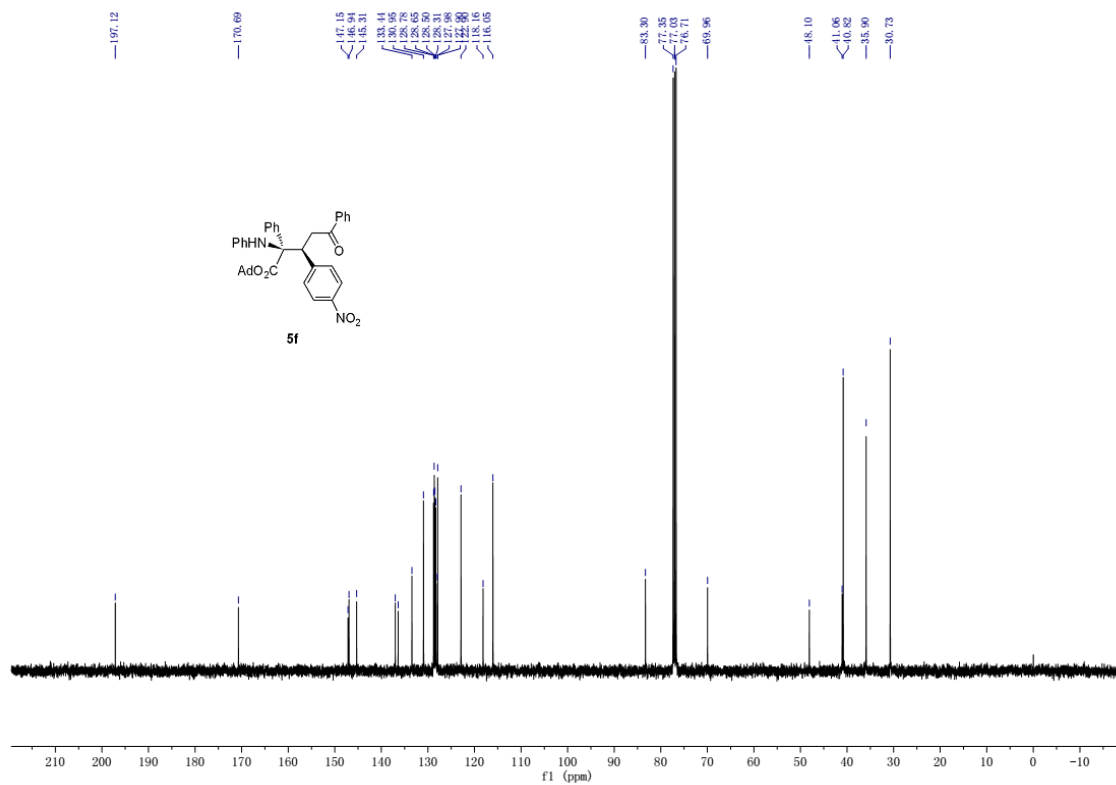

Supplementary Figure 12. <sup>13</sup>C NMR (100MHz, CDCl<sub>3</sub>) spectrum for **5f**

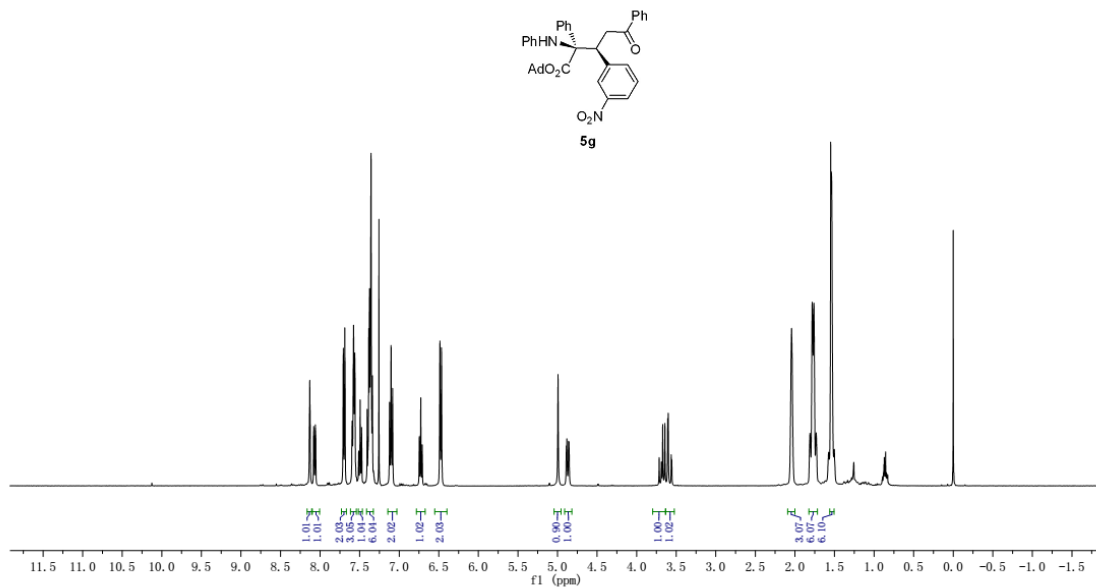

Supplementary Figure 13.  $^1\text{H}$  NMR (400MHz,  $\text{CDCl}_3$ ) spectrum for **5g**

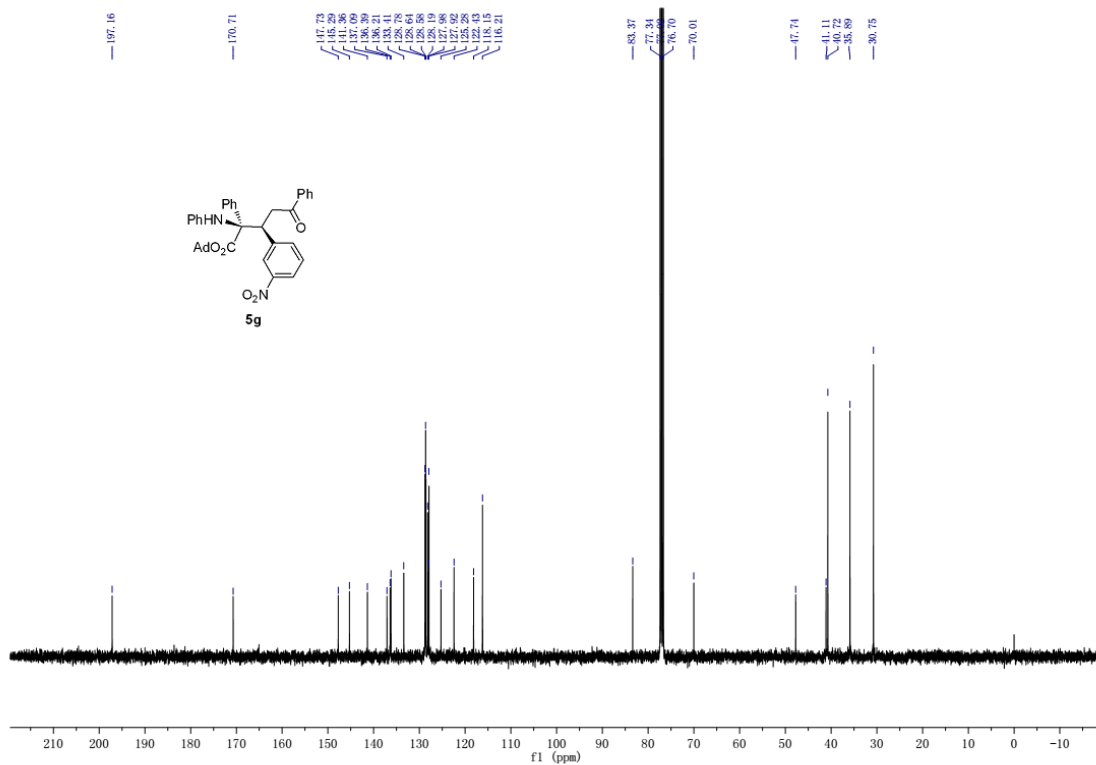

Supplementary Figure 14.  $^{13}\text{C}$  NMR (100MHz,  $\text{CDCl}_3$ ) spectrum for **5g**

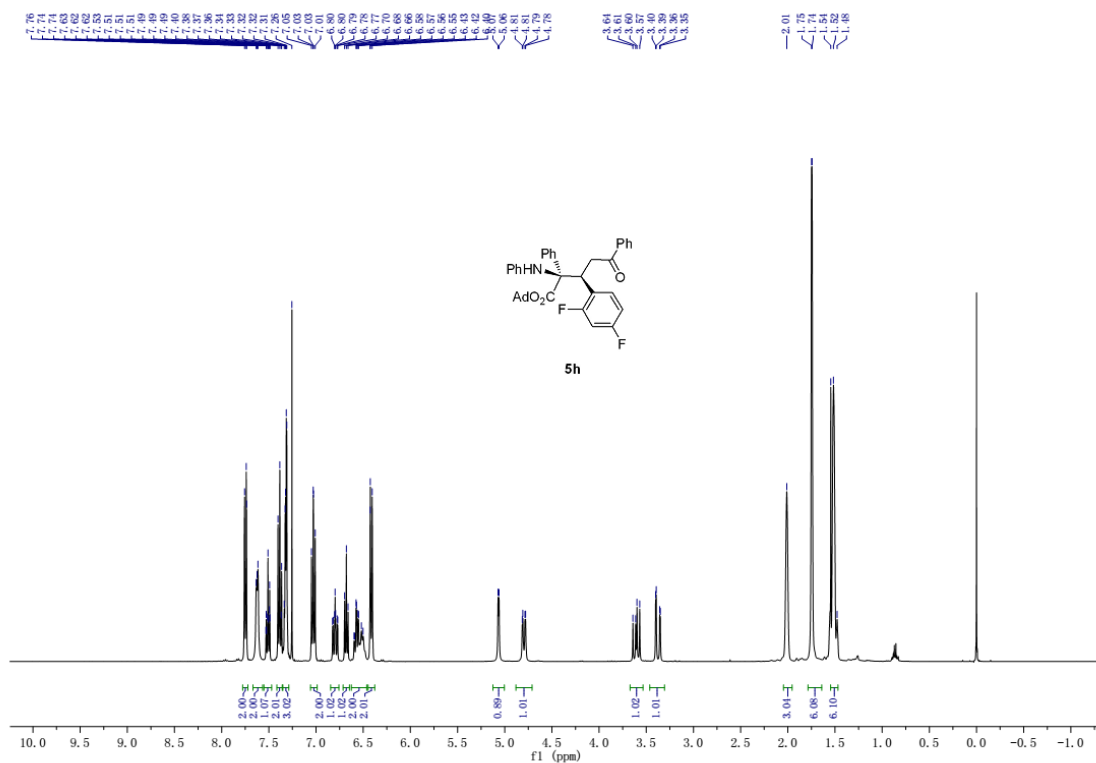

Supplementary Figure 15. <sup>1</sup>H NMR (400MHz, CDCl<sub>3</sub>) spectrum for 5h

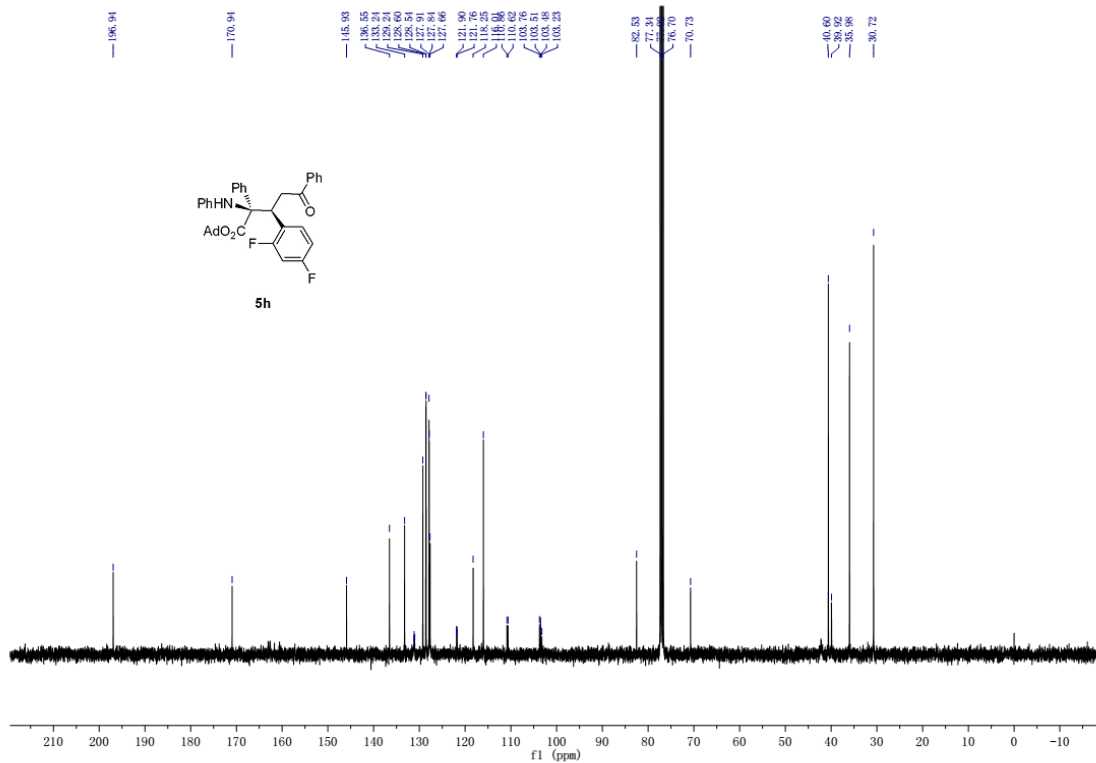

Supplementary Figure 16. <sup>13</sup>C NMR (100MHz, CDCl<sub>3</sub>) spectrum for 5h



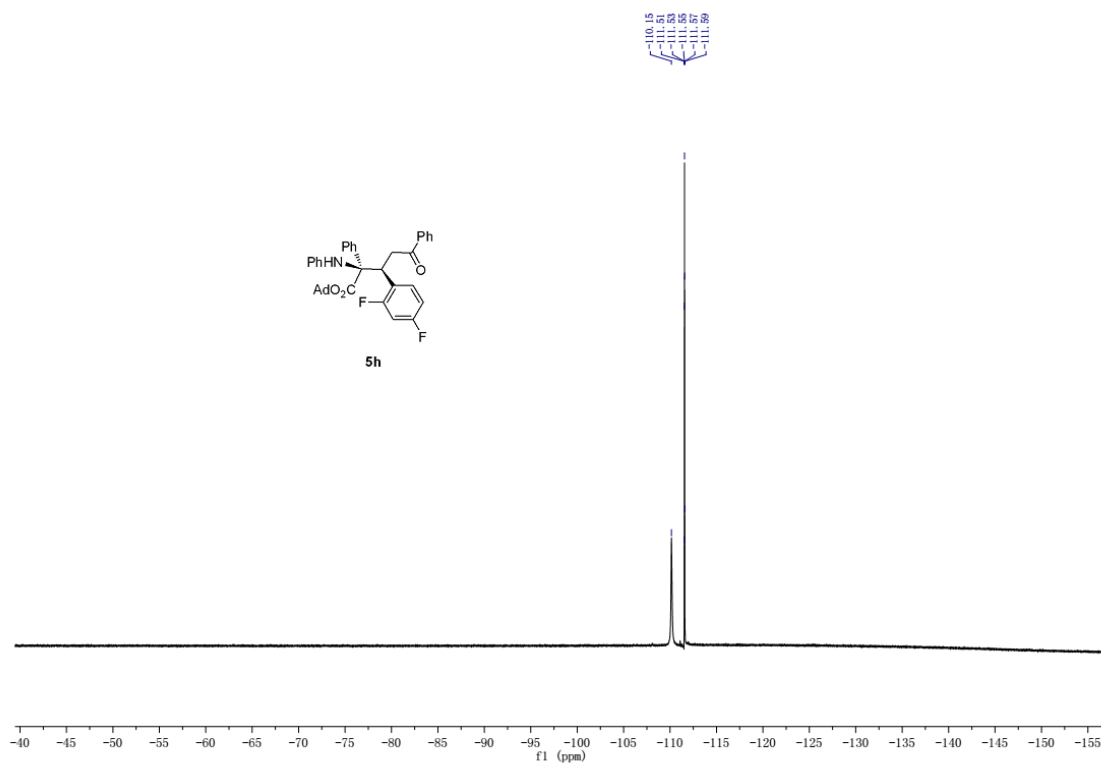

Supplementary Figure 17.  $^{19}\text{F}$  NMR (376 MHz,  $\text{CDCl}_3$ ) for 5h

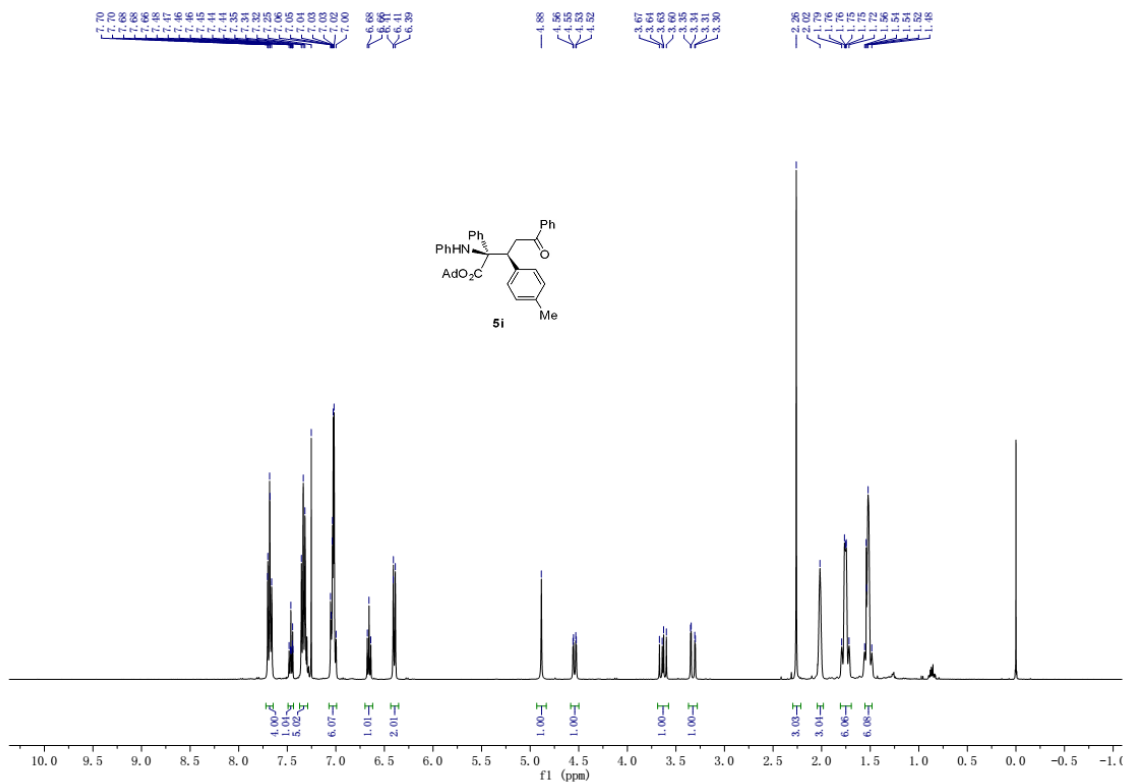

Supplementary Figure 18. <sup>1</sup>H NMR (400MHz, CDCl<sub>3</sub>) spectrum for **5i**

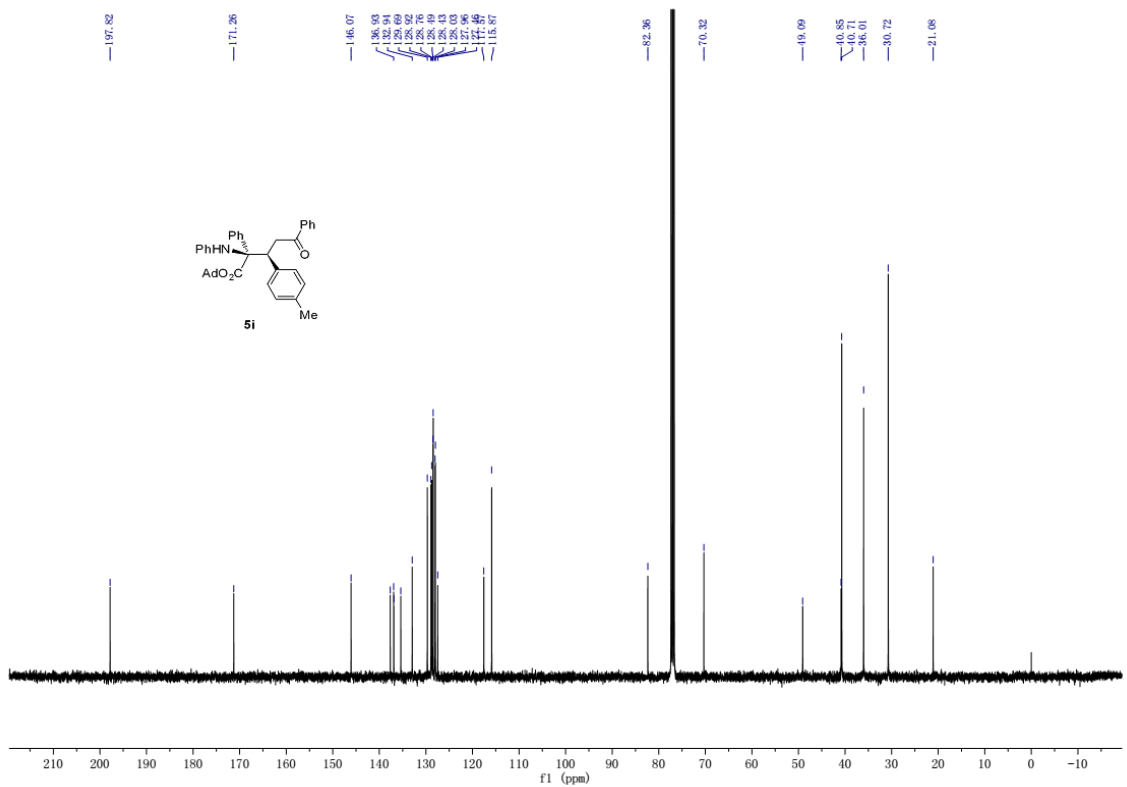

Supplementary Figure 19. <sup>13</sup>C NMR (100MHz, CDCl<sub>3</sub>) spectrum for **5i**

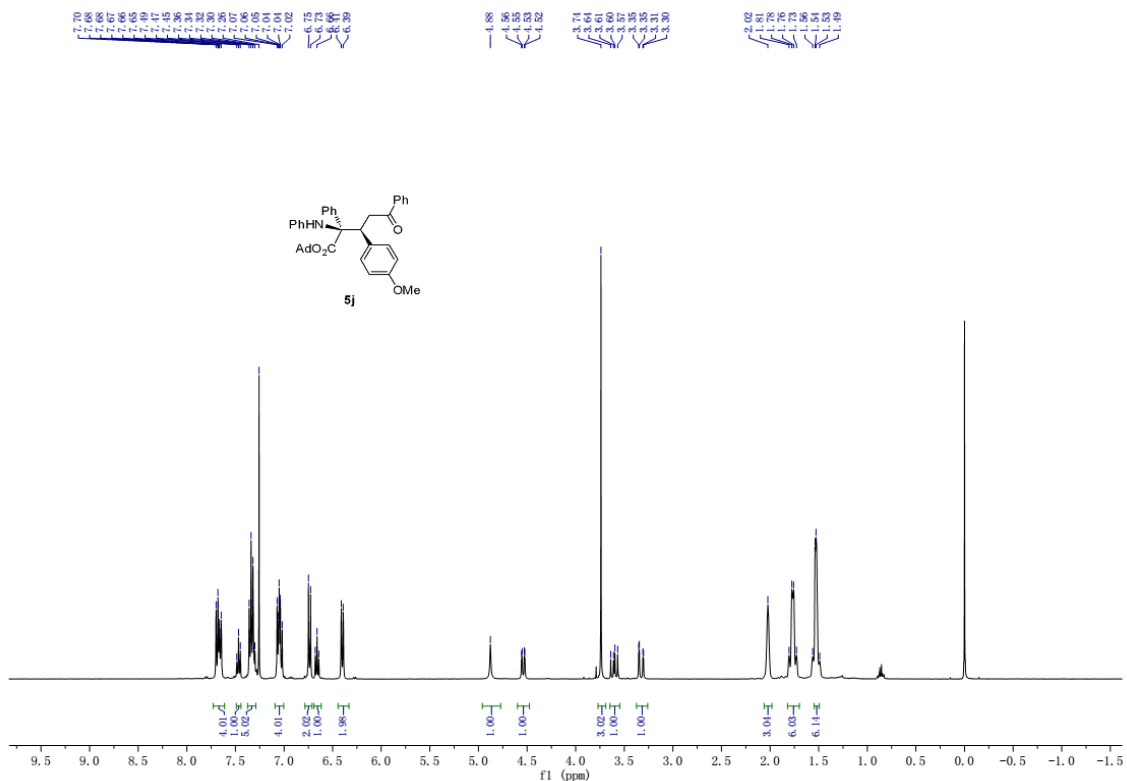

Supplementary Figure 20. <sup>1</sup>H NMR (400MHz, CDCl<sub>3</sub>) spectrum for 5j

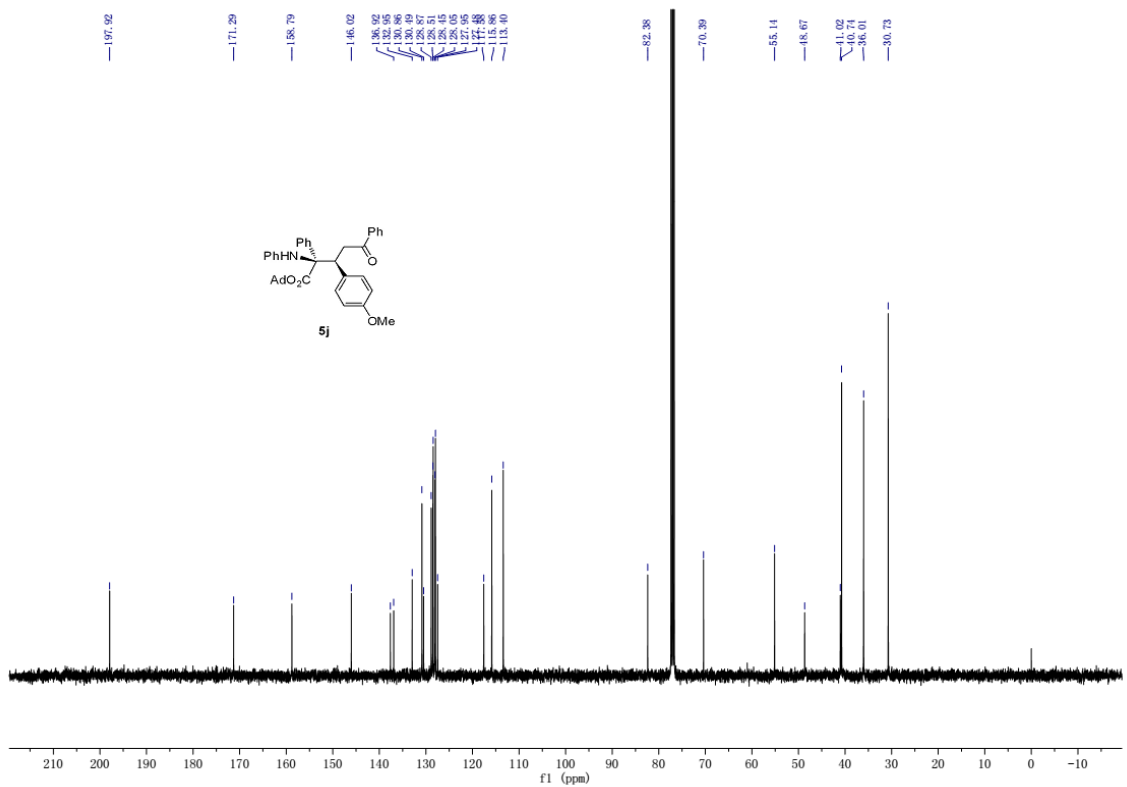

Supplementary Figure 21. <sup>13</sup>C NMR (100MHz, CDCl<sub>3</sub>) spectrum for 5j

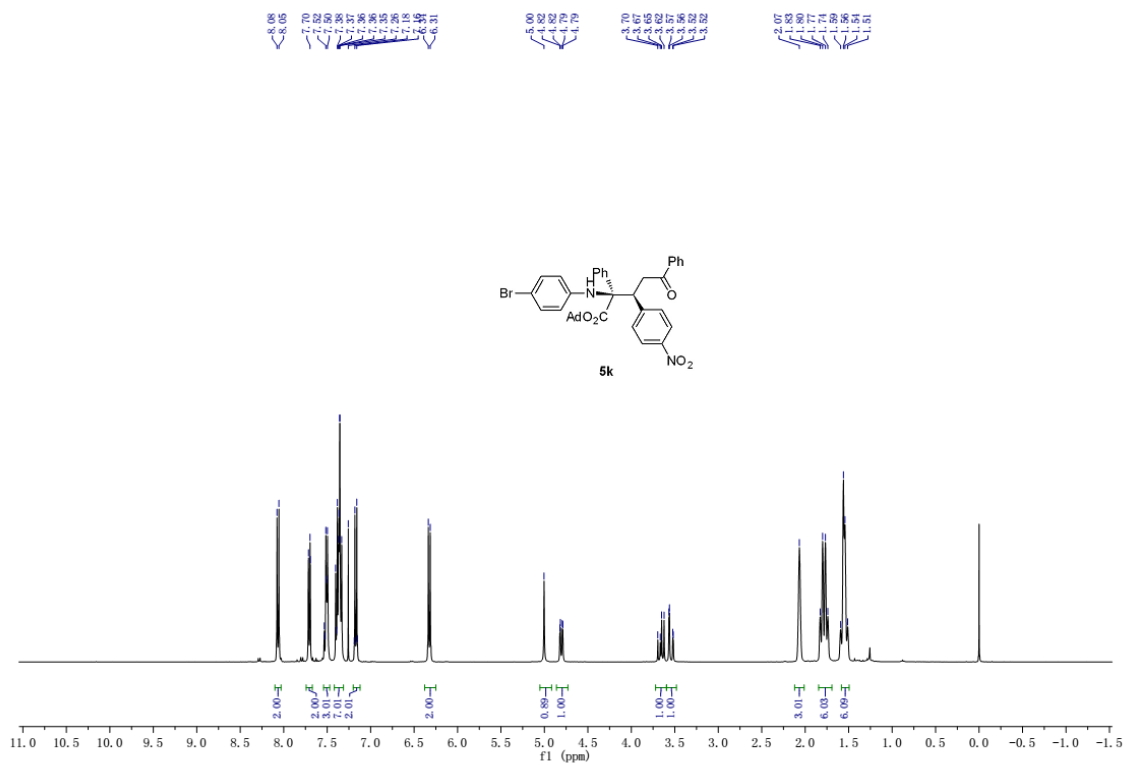

Supplementary Figure 22. <sup>1</sup>H NMR (400MHz, CDCl<sub>3</sub>) spectrum for 5k

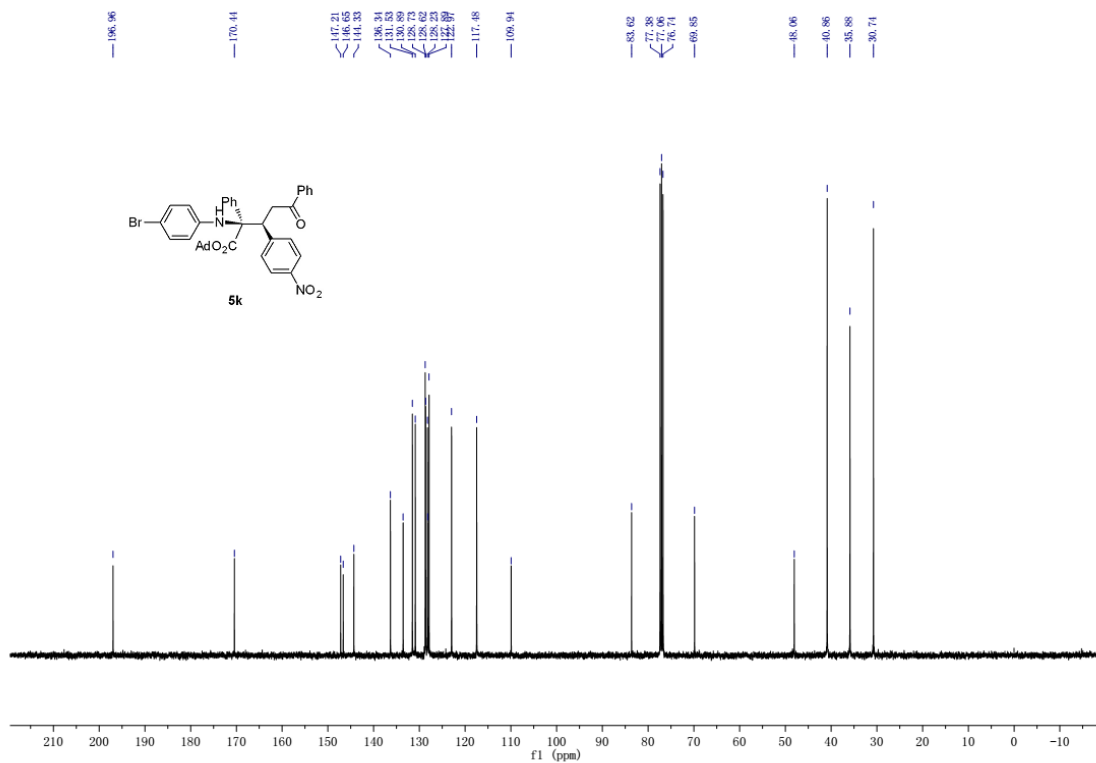

Supplementary Figure 23. <sup>13</sup>C NMR (100MHz, CDCl<sub>3</sub>) spectrum for 5k

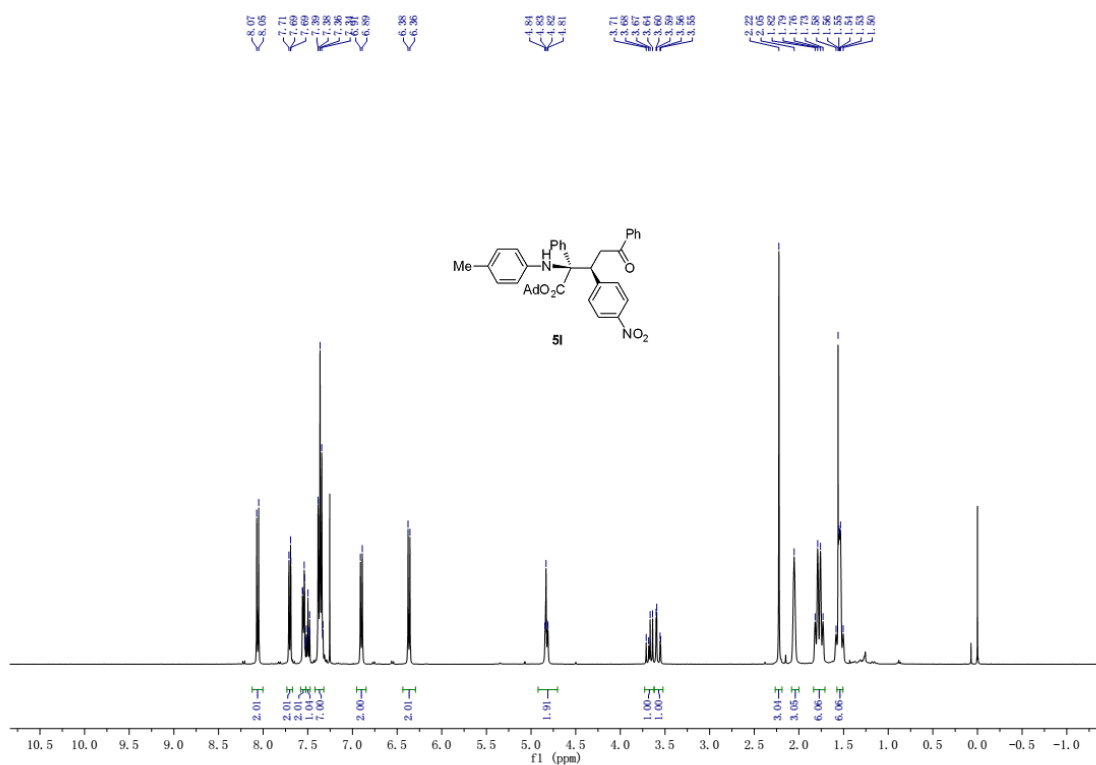

Supplementary Figure 24. <sup>1</sup>H NMR (400MHz, CDCl<sub>3</sub>) spectrum for **5l**

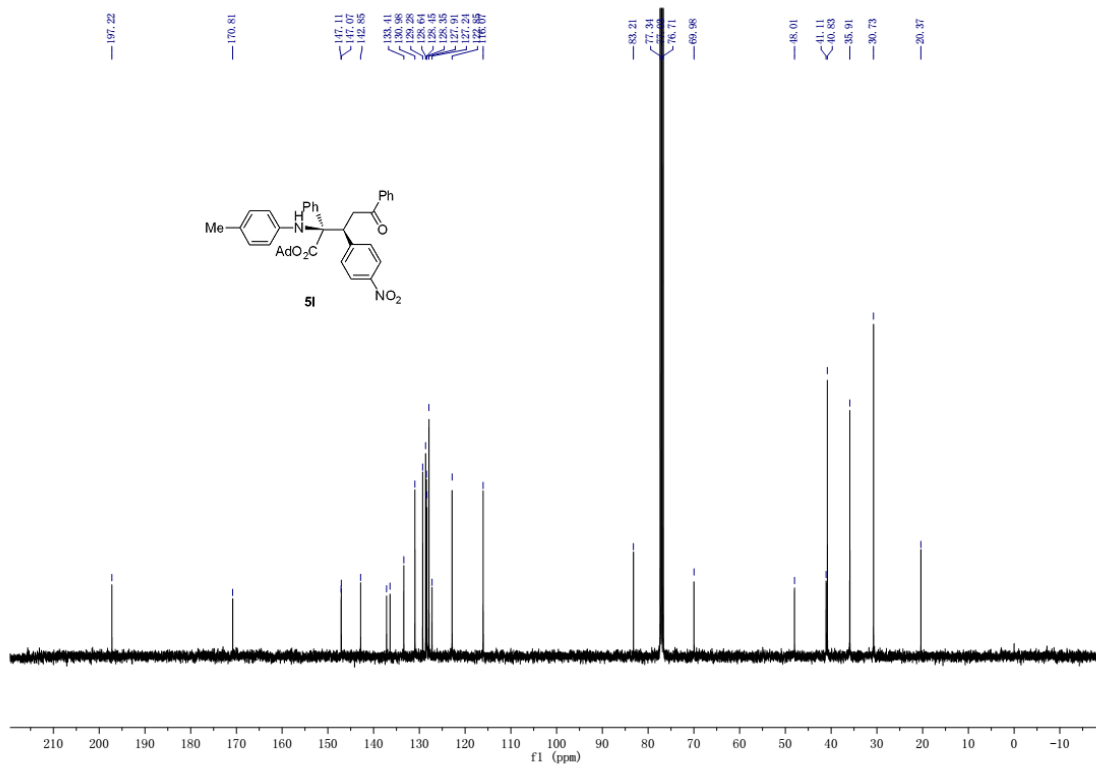

Supplementary Figure 25. <sup>13</sup>C NMR (100MHz, CDCl<sub>3</sub>) spectrum for **5l**

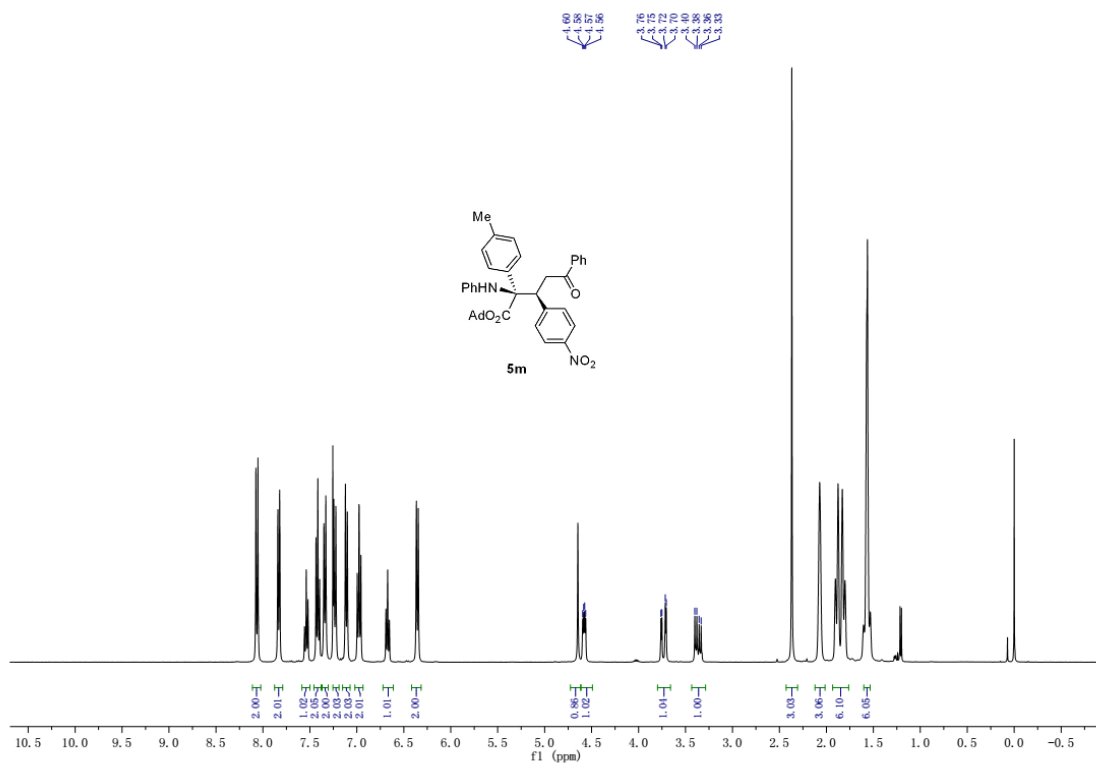

Supplementary Figure 26. <sup>1</sup>H NMR (400MHz, CDCl<sub>3</sub>) spectrum for **5m**

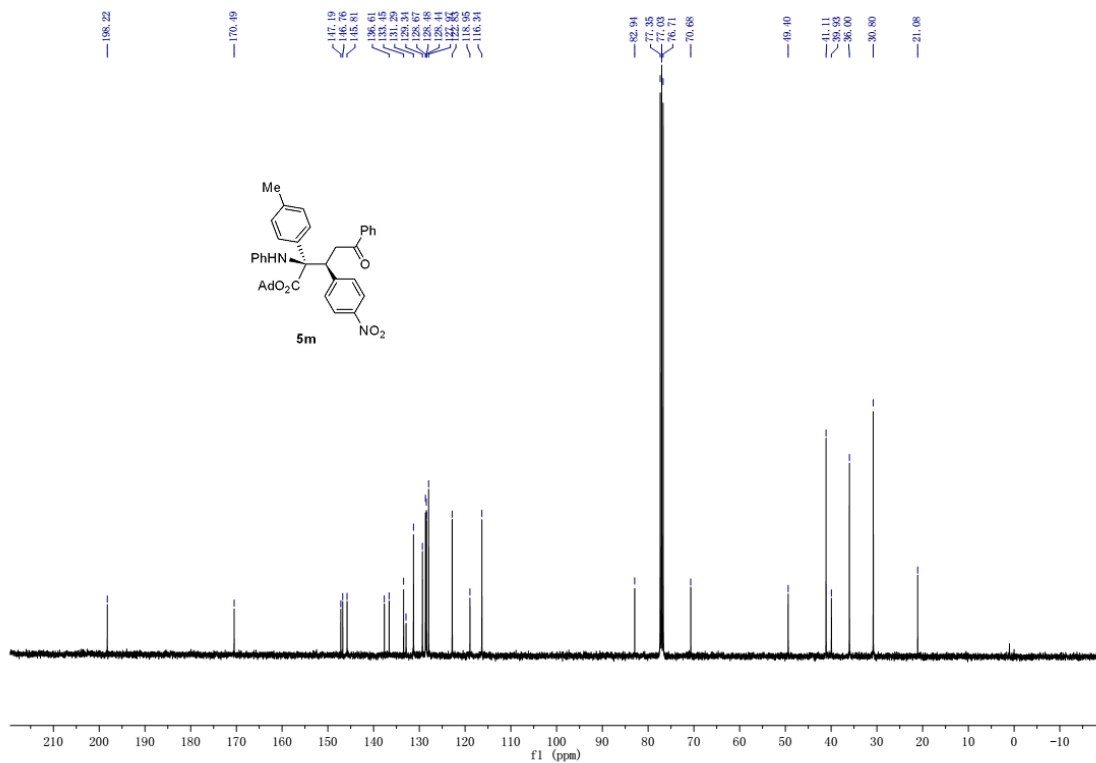

Supplementary Figure 27. <sup>13</sup>C NMR (100MHz, CDCl<sub>3</sub>) spectrum for **5m**

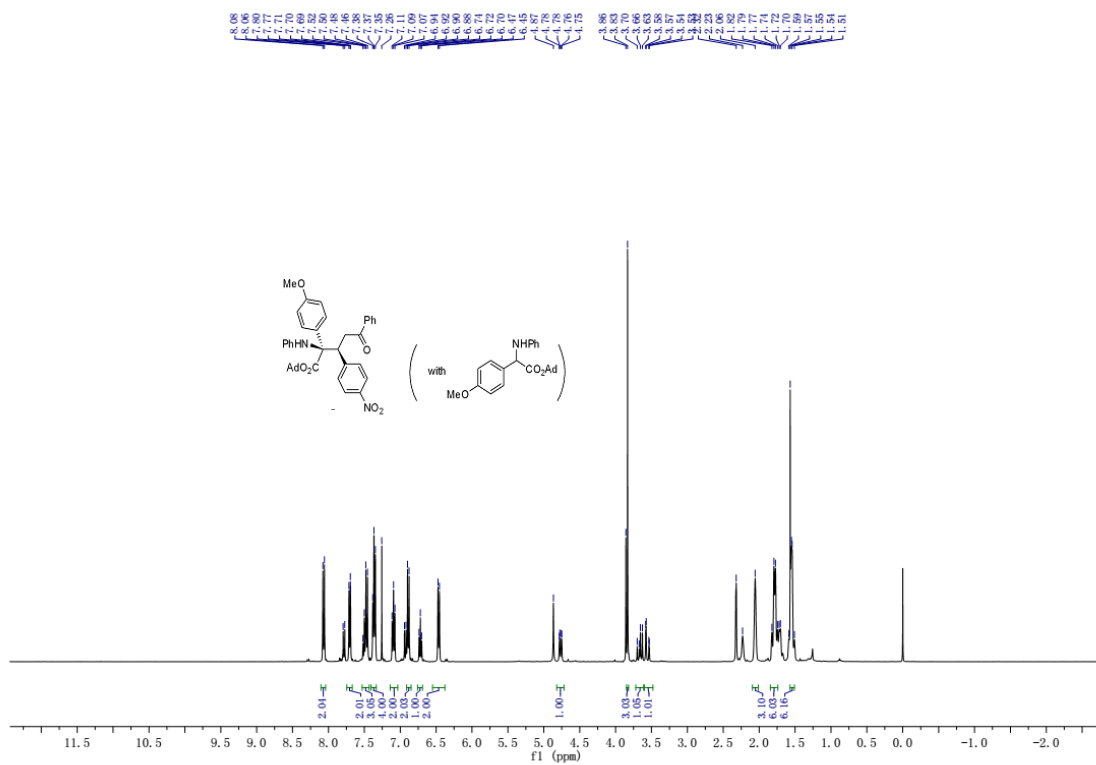

Supplementary Figure 28. <sup>1</sup>H NMR (400MHz, CDCl<sub>3</sub>) spectrum for 5n

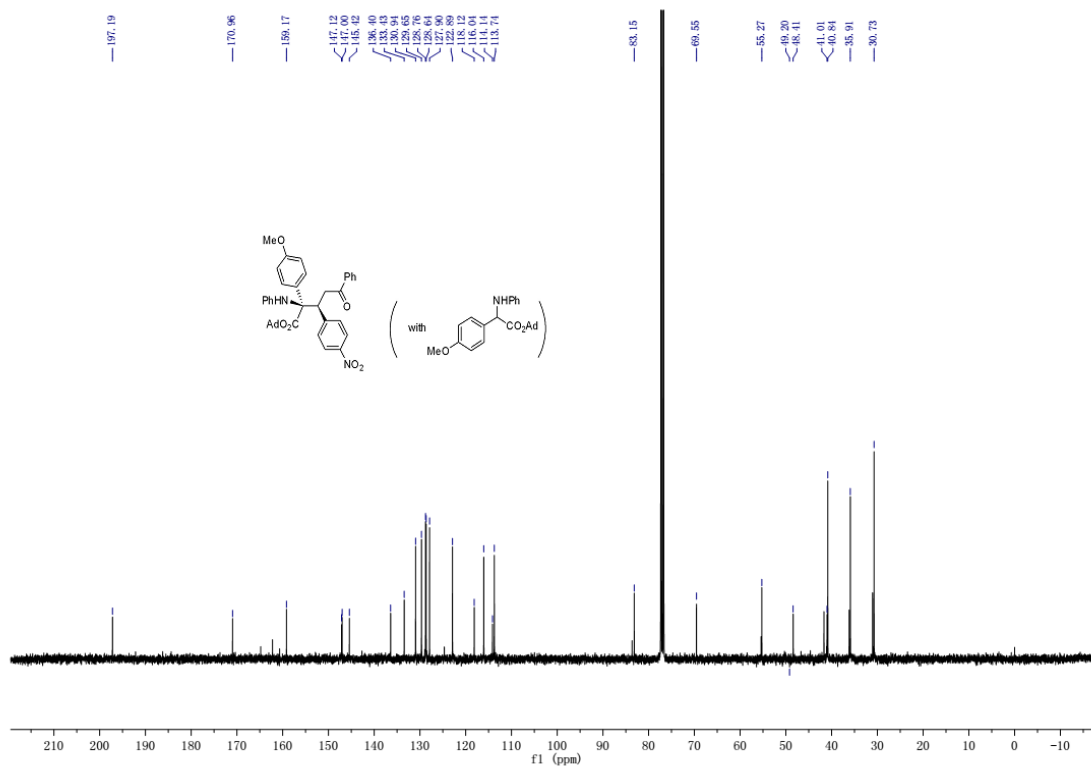

Supplementary Figure 29. <sup>13</sup>C NMR (100MHz, CDCl<sub>3</sub>) spectrum for 5n

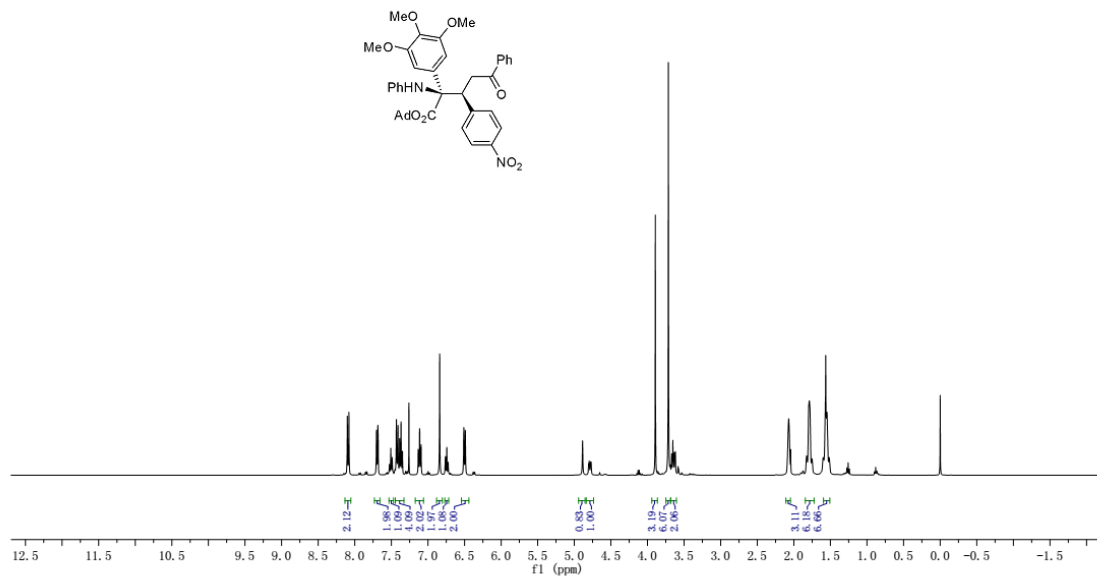

Supplementary Figure 30.  $^1\text{H NMR}$  (400MHz,  $\text{CDCl}_3$ ) spectrum for 5o

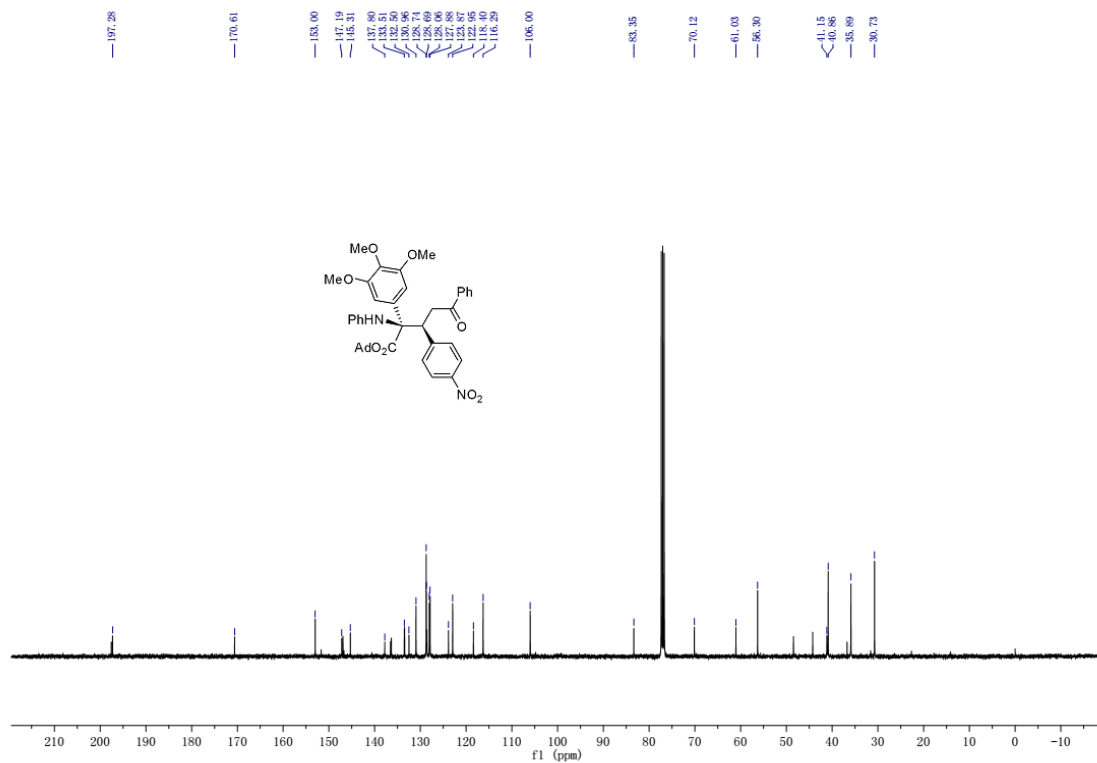

Supplementary Figure 31.  $^{13}\text{C NMR}$  (100MHz,  $\text{CDCl}_3$ ) spectrum for 5o



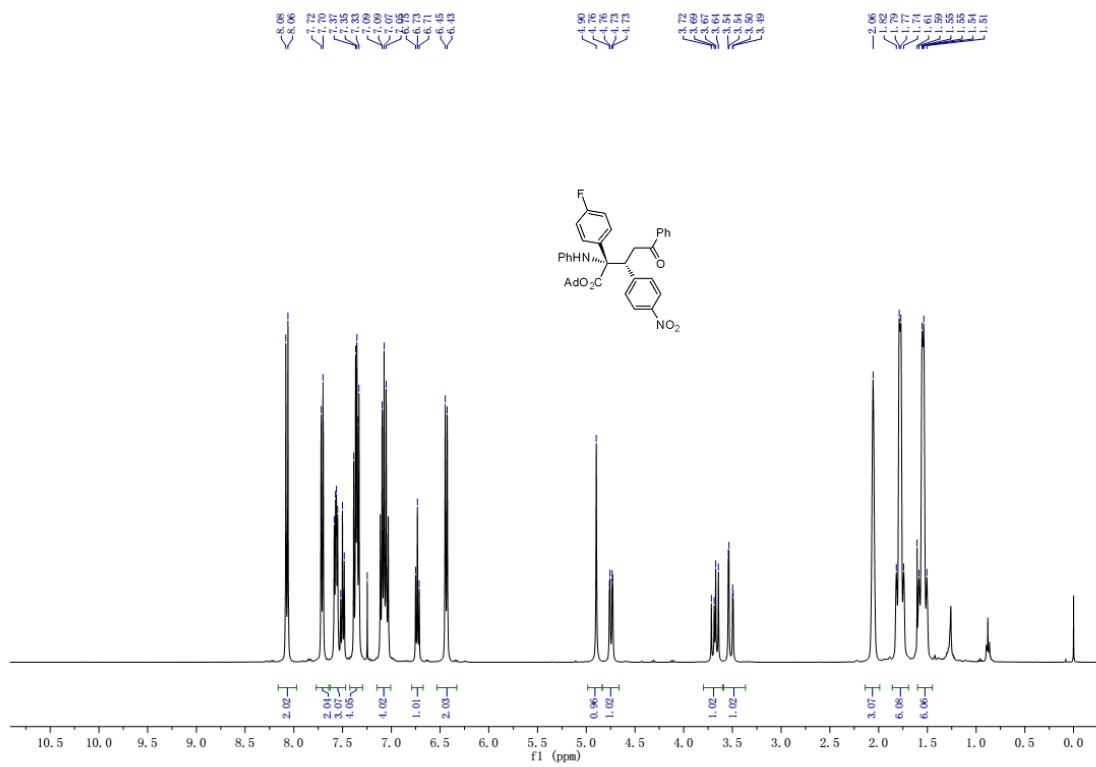

Supplementary Figure 32. <sup>1</sup>H NMR (400MHz, CDCl<sub>3</sub>) spectrum for 5p

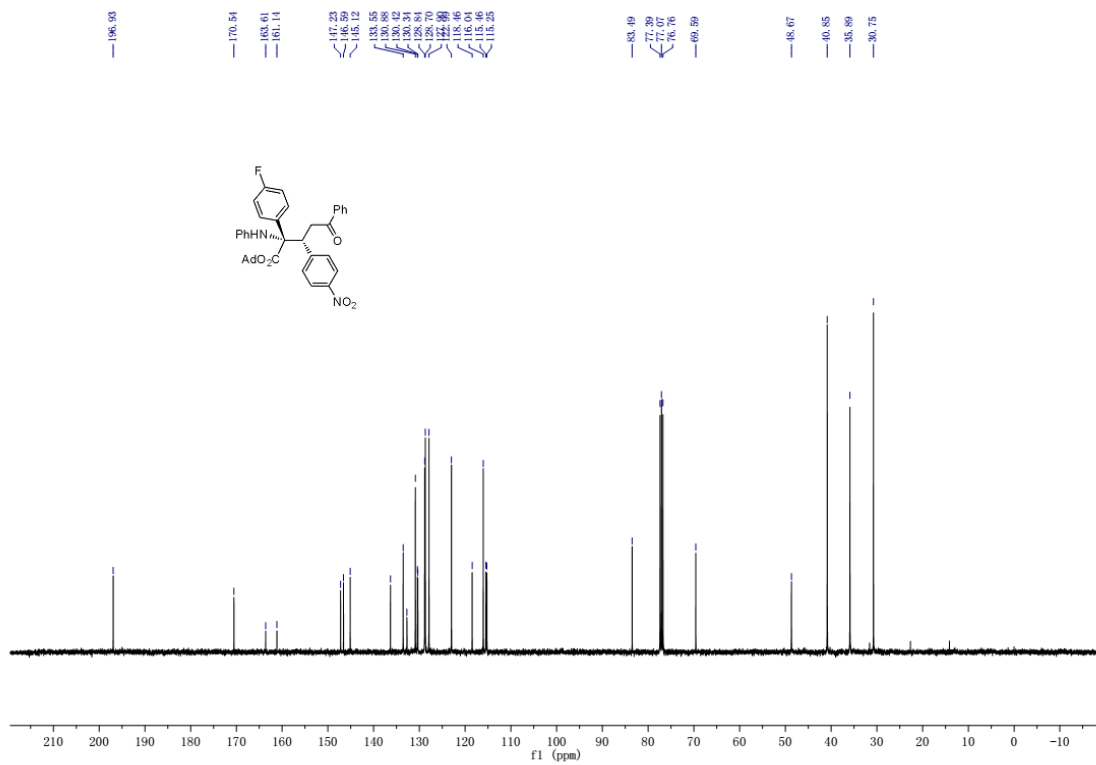

Supplementary Figure 33. <sup>13</sup>C NMR (100MHz, CDCl<sub>3</sub>) spectrum for 5p

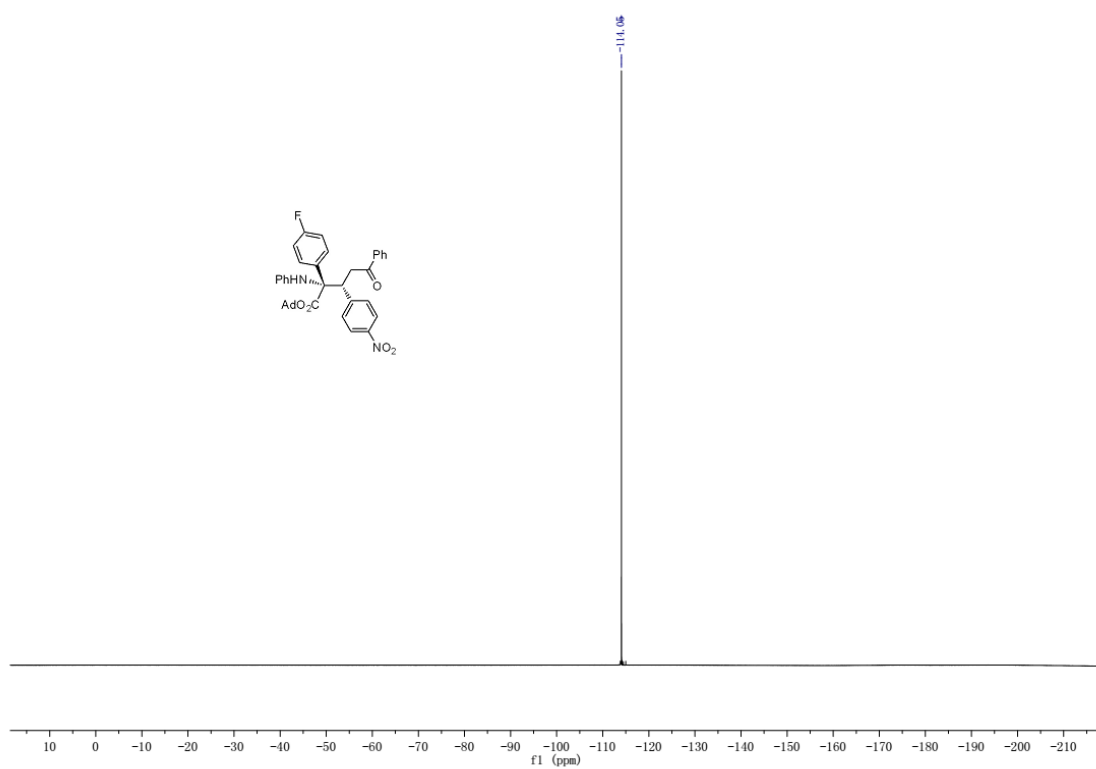

Supplementary Figure 34.  $^{19}\text{F}$  NMR (376MHz,  $\text{CDCl}_3$ ) spectrum for 5b

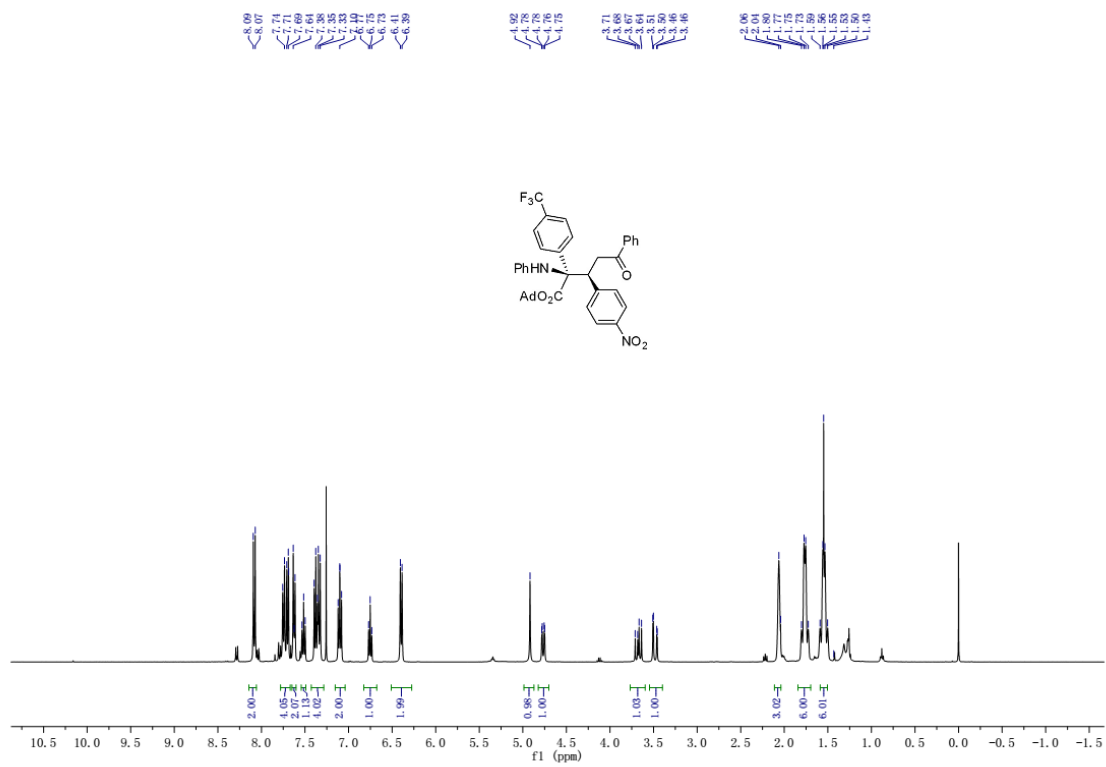

Supplementary Figure 35. <sup>1</sup>H NMR (400MHz, CDCl<sub>3</sub>) spectrum for 5q

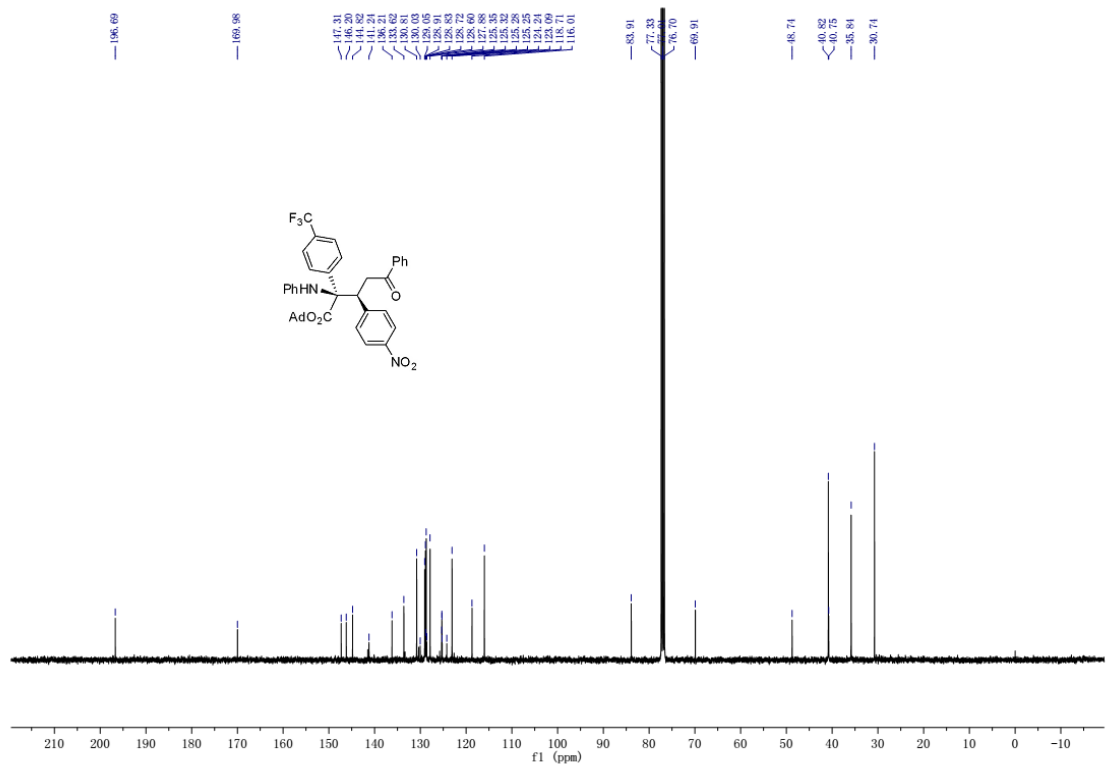

Supplementary Figure 36. <sup>13</sup>C NMR (100MHz, CDCl<sub>3</sub>) spectrum for 5q

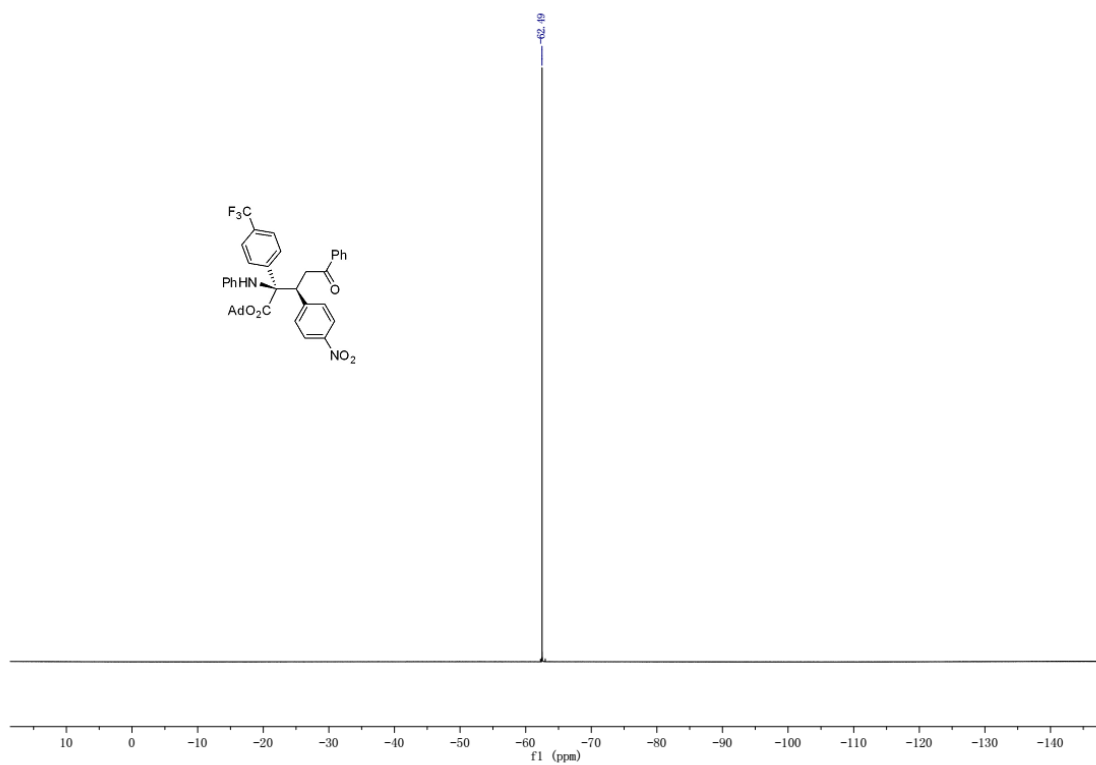

Supplementary Figure 37.  $^{19}\text{F}$  NMR (376MHz,  $\text{CDCl}_3$ ) spectrum for 5q

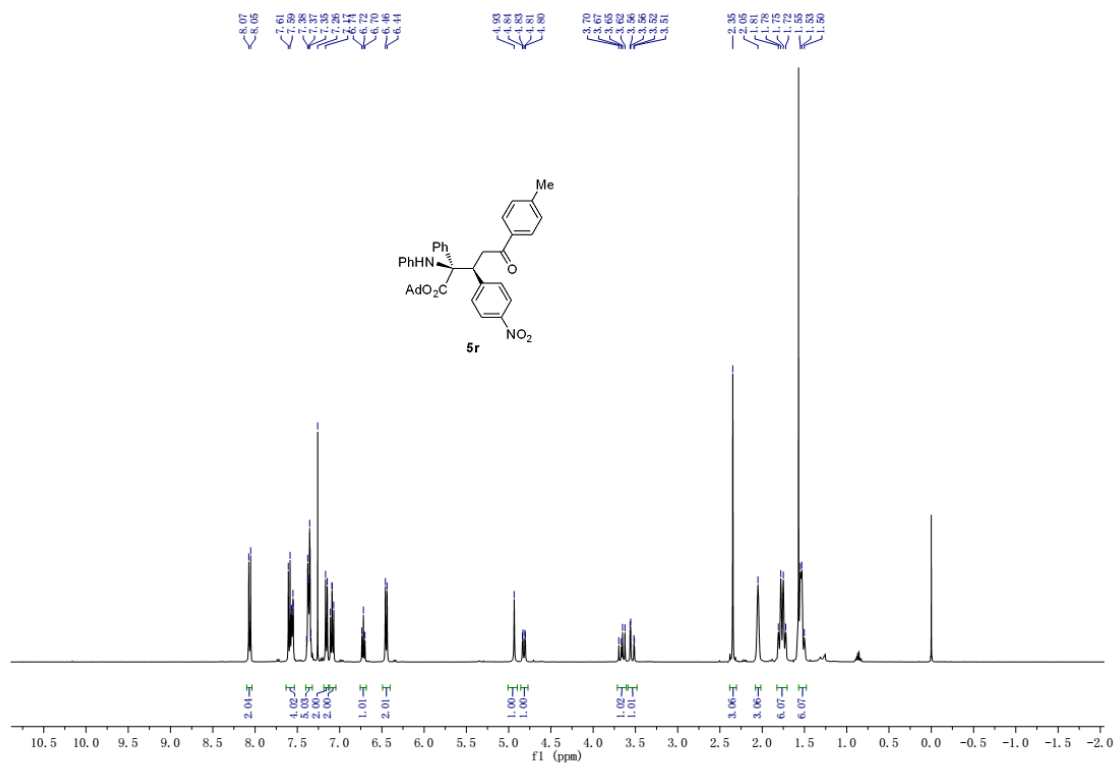

Supplementary Figure 38. <sup>1</sup>H NMR (400MHz, CDCl<sub>3</sub>) spectrum for **5r**

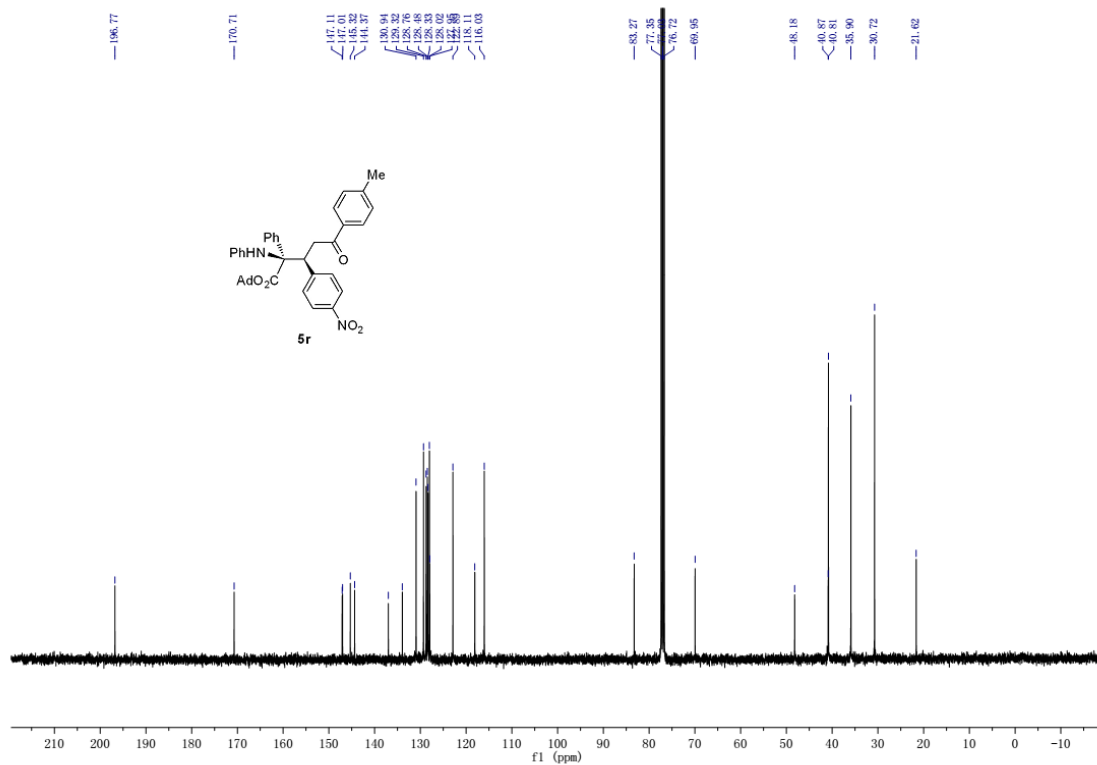

Supplementary Figure 39. <sup>13</sup>C NMR (100MHz, CDCl<sub>3</sub>) spectrum for **5r**

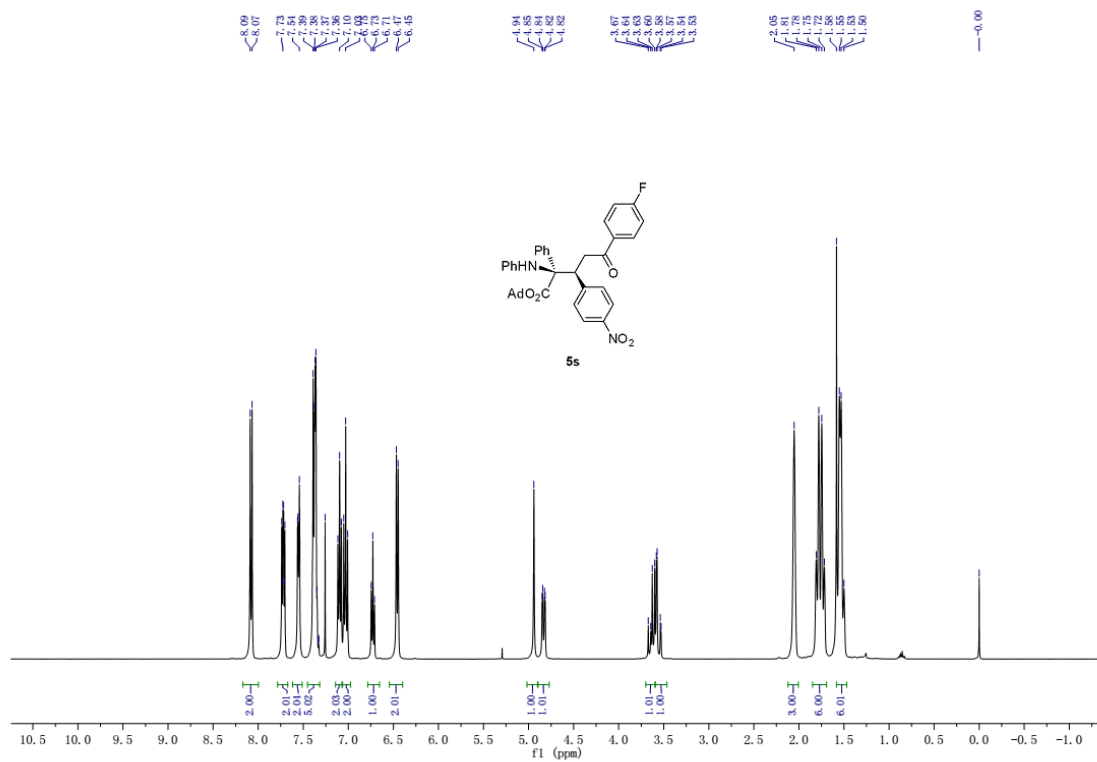

Supplementary Figure 40. <sup>1</sup>H NMR (400MHz, CDCl<sub>3</sub>) spectrum for 5s

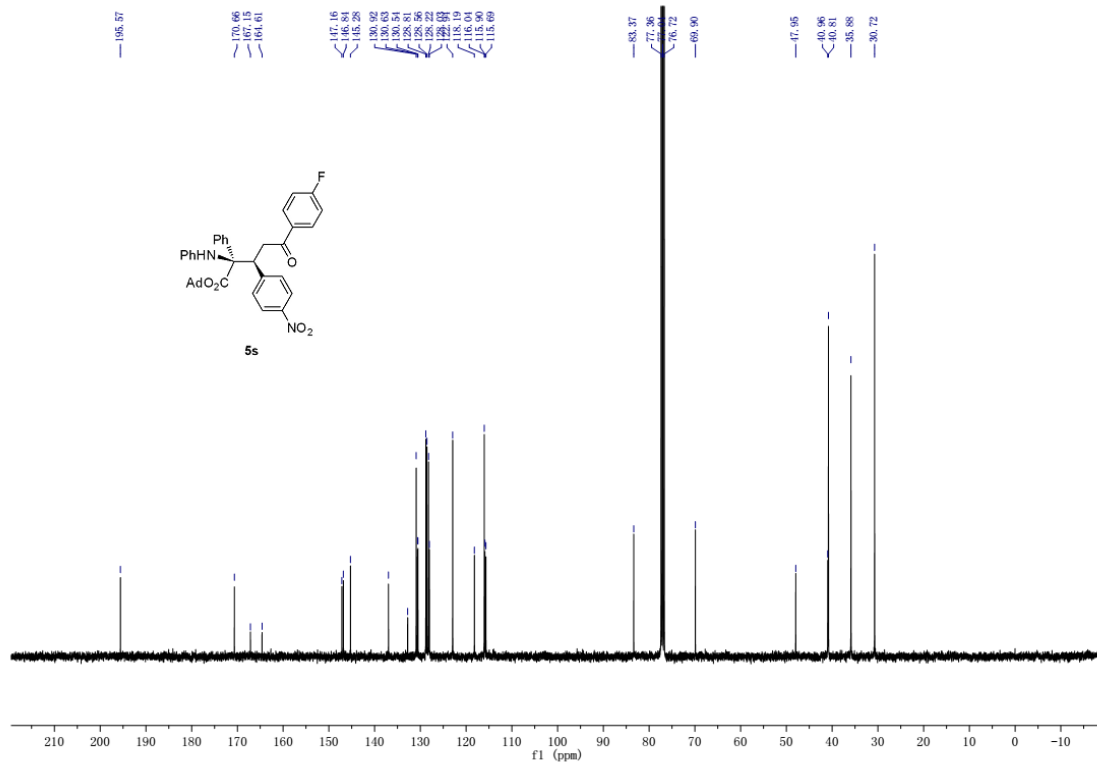

Supplementary Figure 41. <sup>13</sup>C NMR (100MHz, CDCl<sub>3</sub>) spectrum for 5s

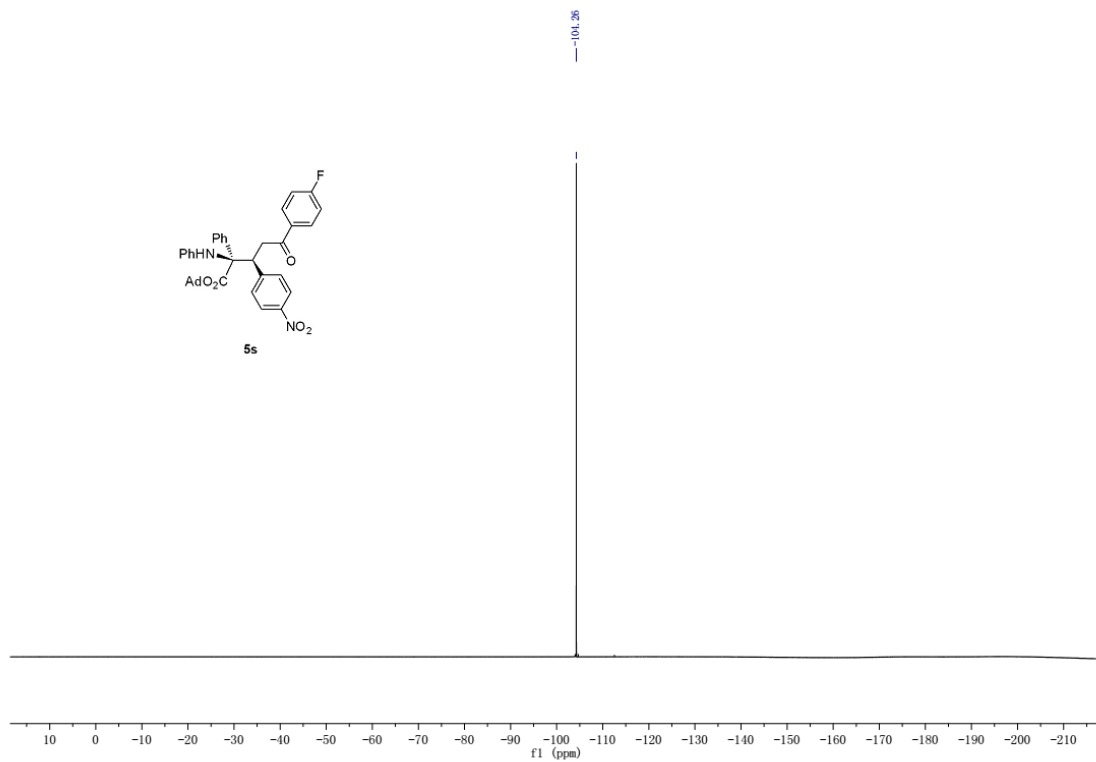

Supplementary Figure 42. <sup>19</sup>F NMR (376MHz, CDCl<sub>3</sub>) spectrum for **5s**

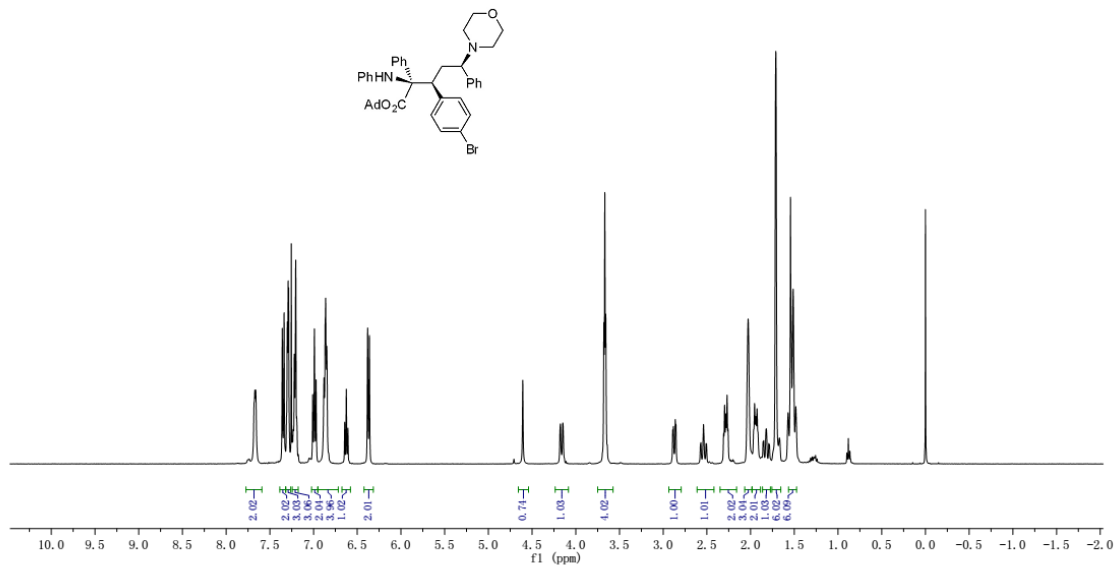

Supplementary Figure 43. <sup>1</sup>H NMR (400MHz, CDCl<sub>3</sub>) spectrum for 11a

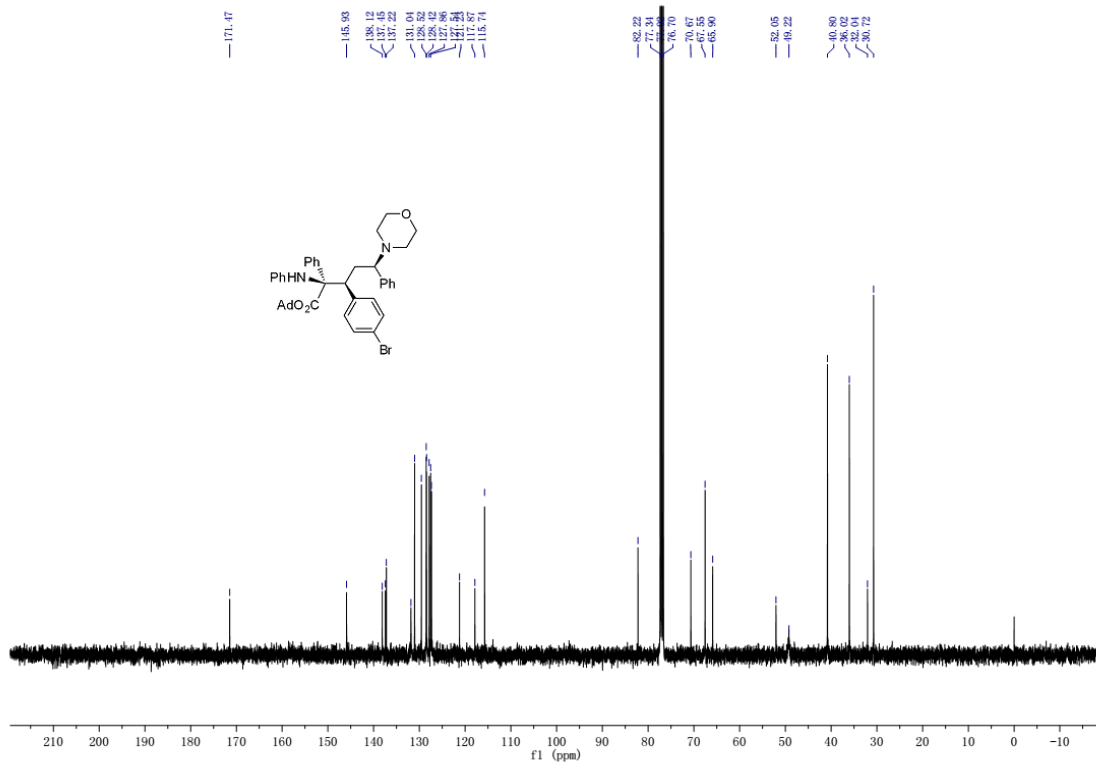

Supplementary Figure 44. <sup>13</sup>C NMR (100MHz, CDCl<sub>3</sub>) spectrum for 11a



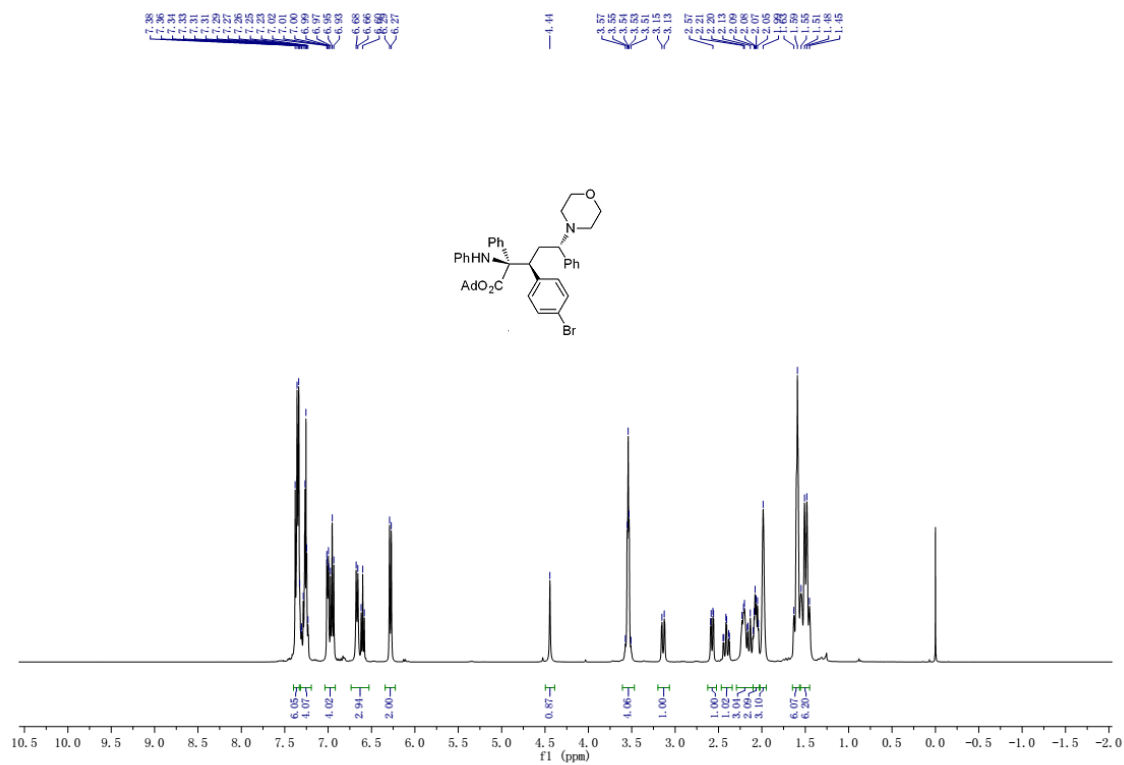

Supplementary Figure 45. <sup>1</sup>H NMR (400MHz, CDCl<sub>3</sub>) spectrum for 11b

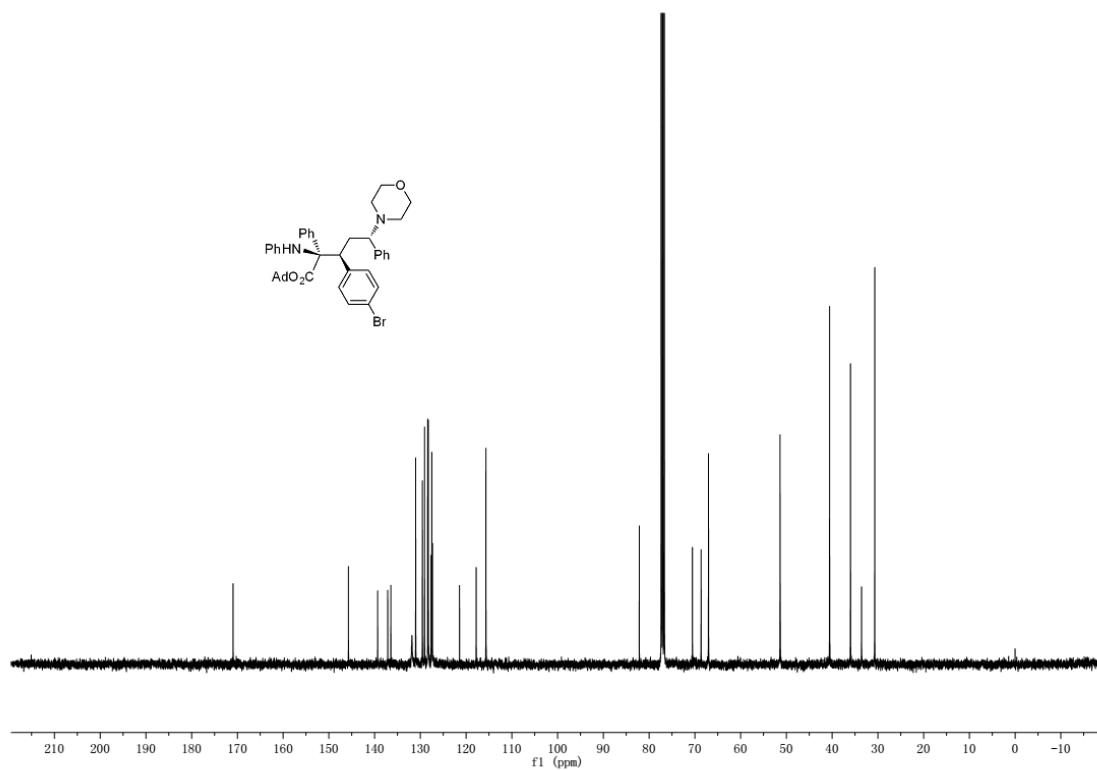

Supplementary Figure 46. <sup>13</sup>C NMR (100MHz, CDCl<sub>3</sub>) spectrum for 11b

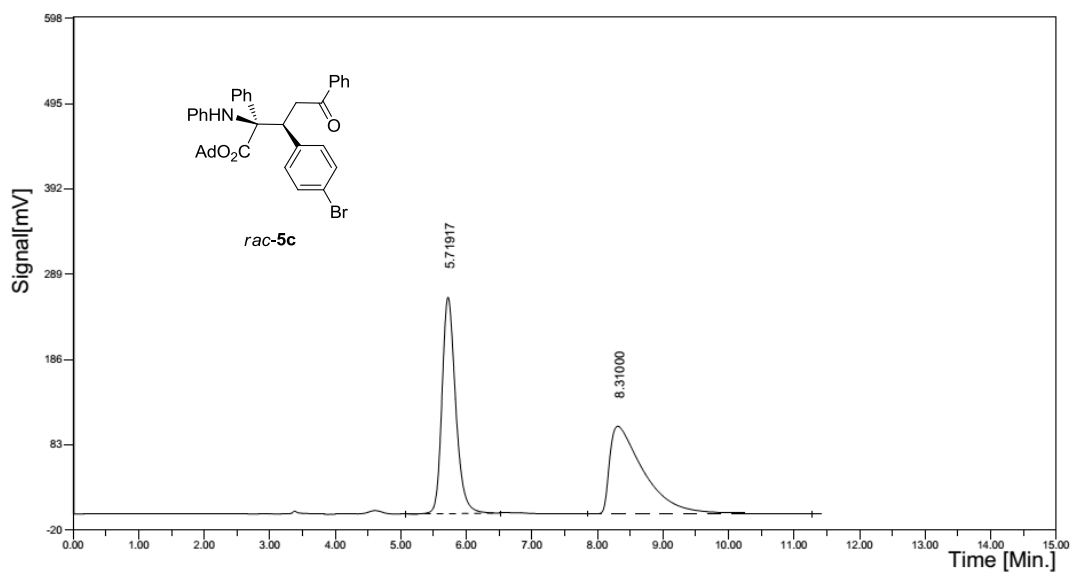

组分表

| #  | 组分名     | 保留时间 (min) | 峰高 (mV) | 峰面积 (mV. sec) | 面积百分比 (%) |
|----|---------|------------|---------|---------------|-----------|
| 1  | Unknown | 5.71917    | 261.15  | 3780.60       | 49.5839   |
| 2  | Unknown | 8.31000    | 105.76  | 3844.06       | 50.4161   |
| 合计 |         |            | 366.91  | 7624.66       | 100       |

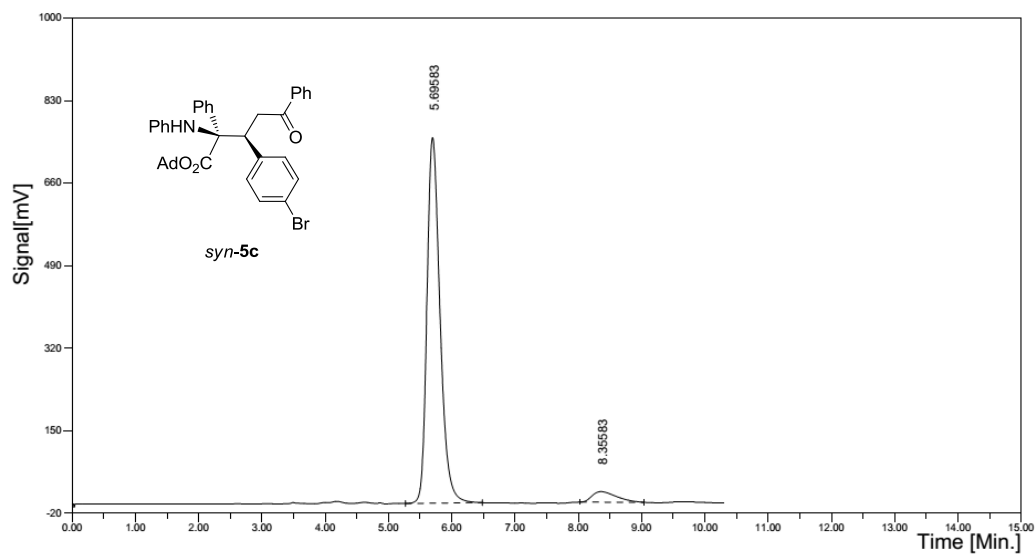

组分表

| #  | 组分名     | 保留时间 (min) | 峰高 (mV) | 峰面积 (mV. sec) | 面积百分比 (%) |
|----|---------|------------|---------|---------------|-----------|
| 1  | Unknown | 5.69583    | 752.74  | 10791.15      | 94.9074   |
| 2  | Unknown | 8.35583    | 21.74   | 579.04        | 5.0926    |
| 合计 |         |            | 774.48  | 11370.19      | 100       |

Supplementary Figure 47. Racemic (upper) and Enantioenriched (under) HPLC Traces for 5c.

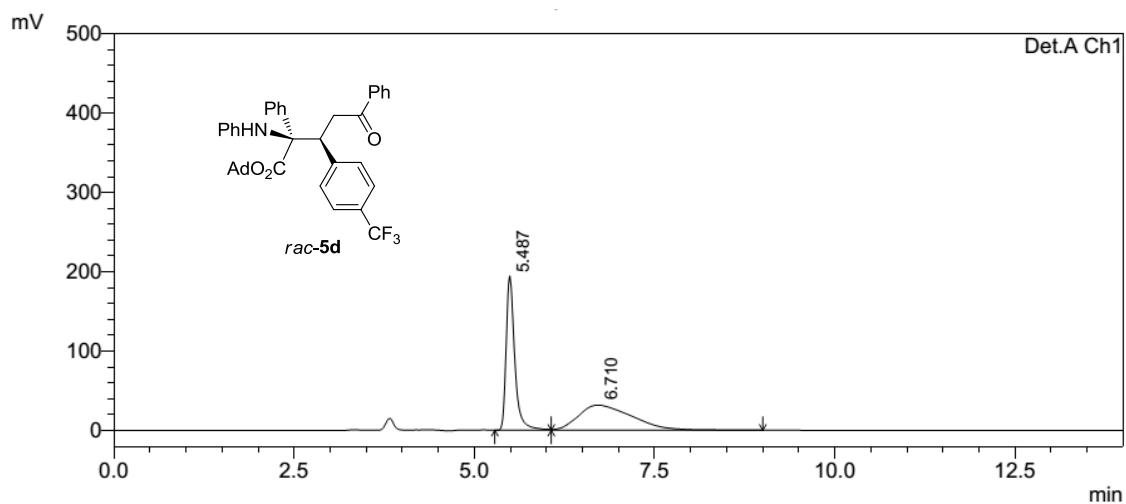

Detector A Ch1 254nm

| Peak# | Ret. Time | Area    | Height | Area %  | Height % |
|-------|-----------|---------|--------|---------|----------|
| 1     | 5.487     | 1613497 | 194610 | 49.687  | 85.947   |
| 2     | 6.710     | 1633840 | 31820  | 50.313  | 14.053   |
| Total |           | 3247337 | 226431 | 100.000 | 100.000  |

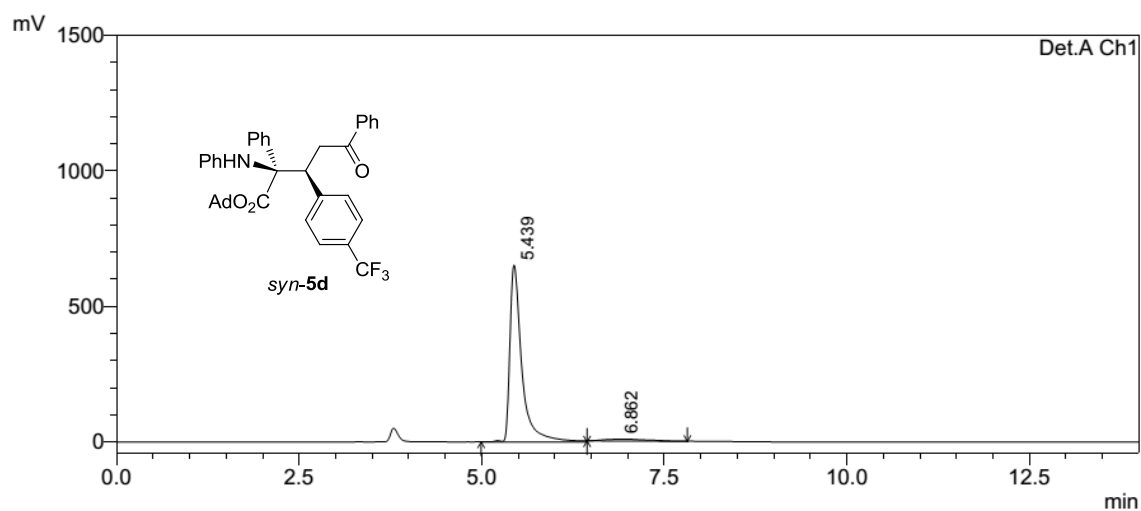

PeakTable

Detector A Ch1 254nm

| Peak# | Ret. Time | Area    | Height | Area %  | Height % |
|-------|-----------|---------|--------|---------|----------|
| 1     | 5.439     | 7454002 | 653259 | 96.126  | 98.959   |
| 2     | 6.862     | 300440  | 6875   | 3.874   | 1.041    |
| Total |           | 7754442 | 660134 | 100.000 | 100.000  |

**Supplementary Figure 48. Racemic (upper) and Enantioenriched (under) HPLC Traces for 5d.**

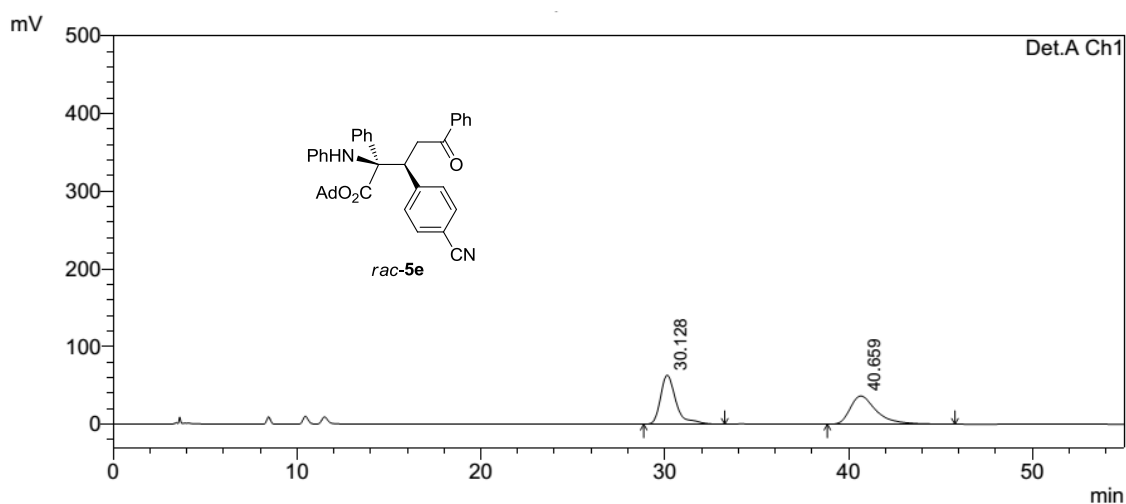

PeakTable

Detector A Ch1 254nm

| Peak# | Ret. Time | Area     | Height | Area %  | Height % |
|-------|-----------|----------|--------|---------|----------|
| 1     | 25.707    | 6079522  | 118545 | 50.389  | 59.060   |
| 2     | 32.552    | 5985689  | 82173  | 49.611  | 40.940   |
| Total |           | 12065211 | 200718 | 100.000 | 100.000  |

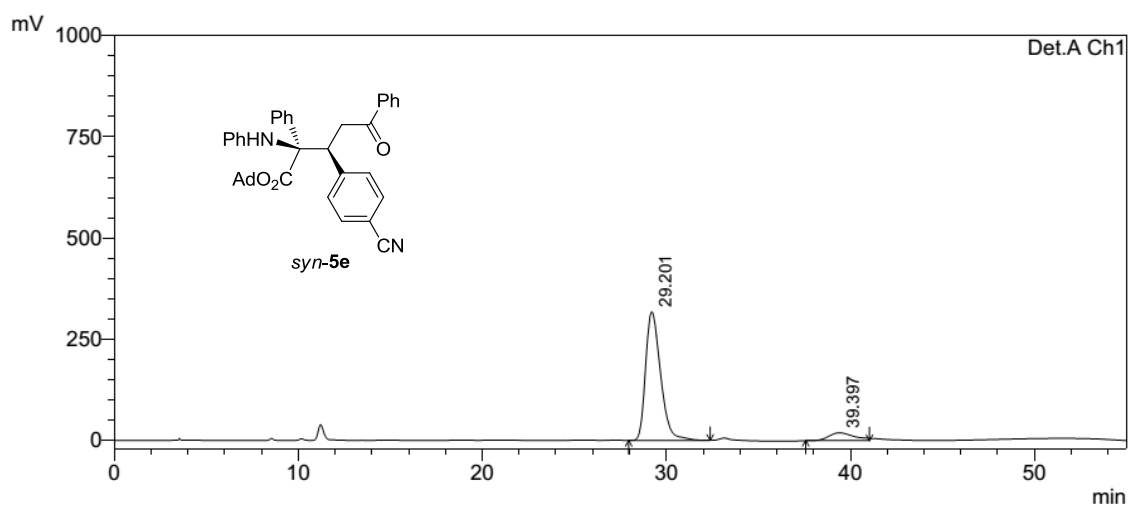

PeakTable

Detector A Ch1 254nm

| Peak# | Ret. Time | Area     | Height | Area %  | Height % |
|-------|-----------|----------|--------|---------|----------|
| 1     | 29.201    | 17978593 | 317736 | 90.761  | 94.328   |
| 2     | 39.397    | 1830076  | 19105  | 9.239   | 5.672    |
| Total |           | 19808670 | 336841 | 100.000 | 100.000  |

**Supplementary Figure 49. Racemic (upper) and Enantioenriched (under) HPLC Traces for 5e.**

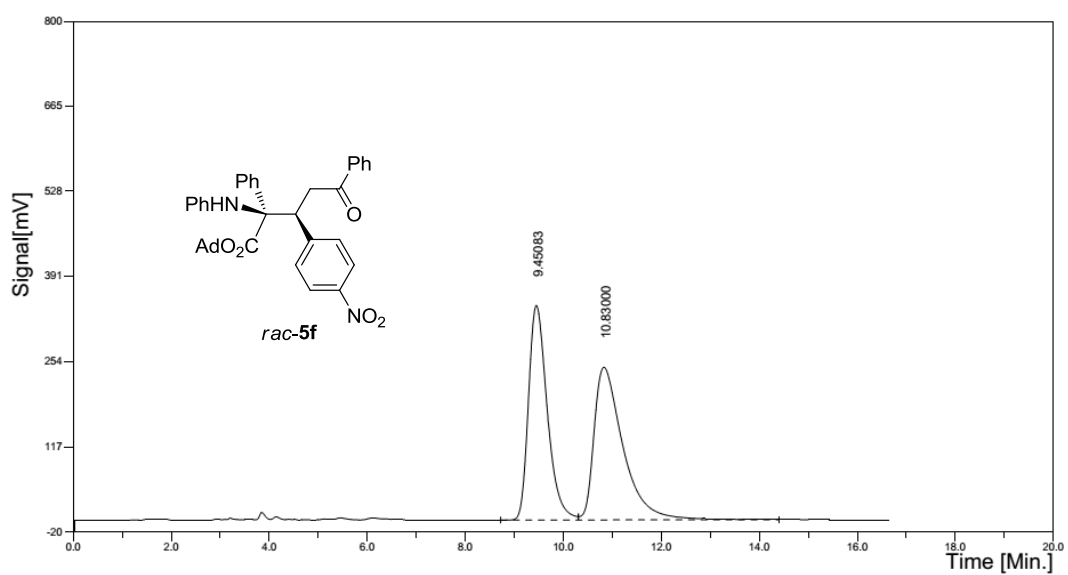

组分表

| #  | 组分名     | 保留时间 (min) | 峰高 (mV) | 峰面积 (mV. sec) | 面积百分比 (%) |
|----|---------|------------|---------|---------------|-----------|
| 1  | Unknown | 9.45083    | 344.45  | 9165.17       | 47.6229   |
| 2  | Unknown | 10.83000   | 245.12  | 10080.14      | 52.3771   |
| 合计 |         |            | 589.57  | 19245.31      | 100       |

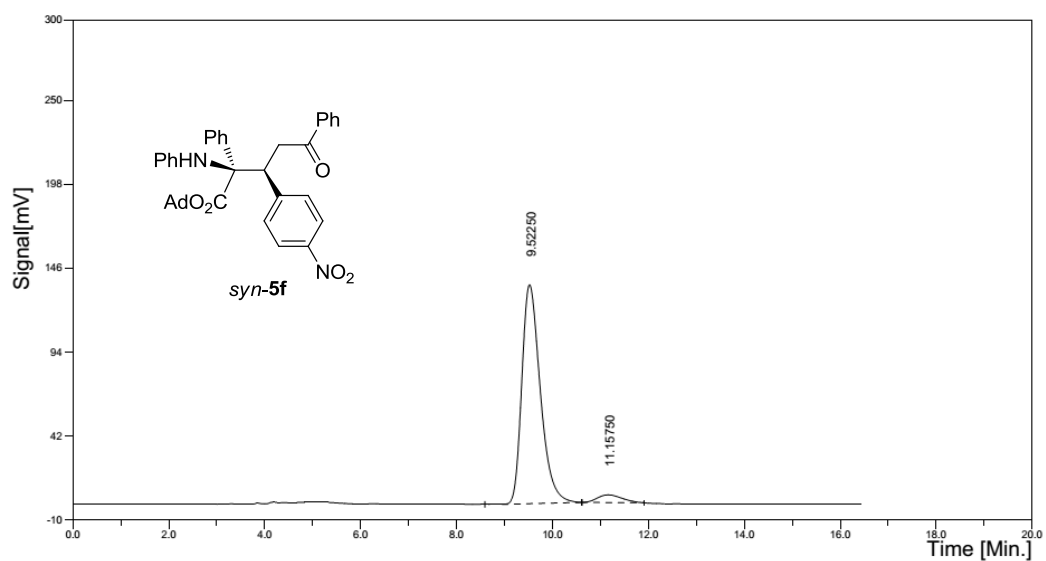

组分表

| #  | 组分名     | 保留时间 (min) | 峰高 (mV) | 峰面积 (mV. sec) | 面积百分比 (%) |
|----|---------|------------|---------|---------------|-----------|
| 1  | Unknown | 9.52250    | 135.59  | 3618.31       | 95.5065   |
| 2  | Unknown | 11.15750   | 4.76    | 170.24        | 4.4935    |
| 合计 |         |            | 140.35  | 3788.54       | 100       |

Supplementary Figure 50. Racemic (upper) and Enantioenriched (under) HPLC Traces for 5f.

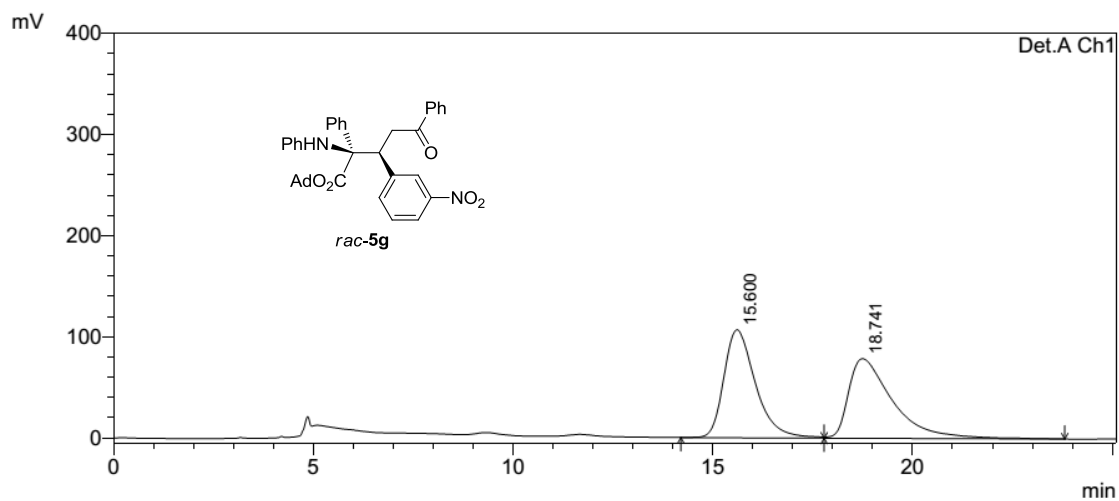

| Peak# | Ret. Time | Area     | Height | Area %  | Height % |
|-------|-----------|----------|--------|---------|----------|
| 1     | 15.600    | 5882471  | 106951 | 49.366  | 57.565   |
| 2     | 18.741    | 6033553  | 78840  | 50.634  | 42.435   |
| Total |           | 11916024 | 185791 | 100.000 | 100.000  |

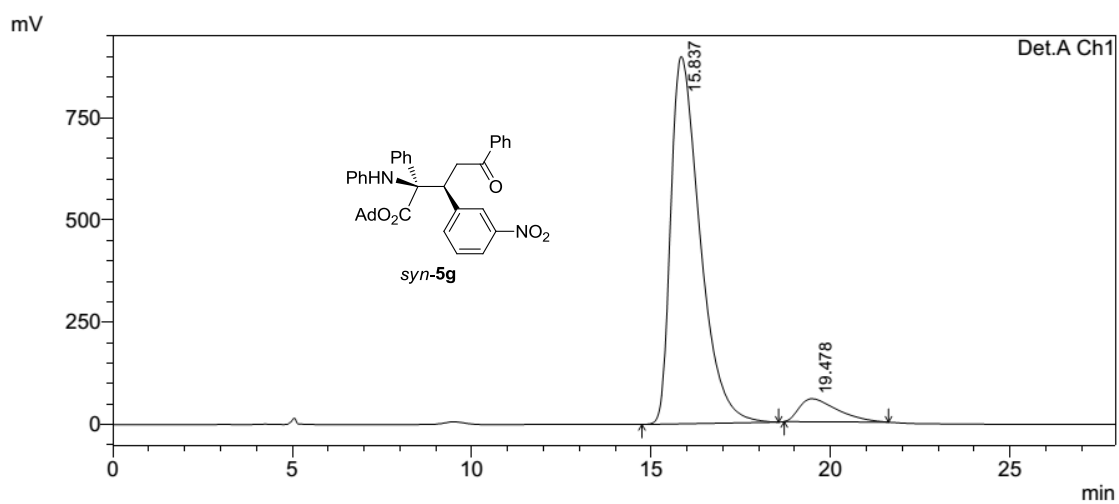

| Peak# | Ret. Time | Area     | Height | Area %  | Height % |
|-------|-----------|----------|--------|---------|----------|
| 1     | 15.837    | 50850455 | 898497 | 92.364  | 94.102   |
| 2     | 19.478    | 4203863  | 56319  | 7.636   | 5.898    |
| Total |           | 55054317 | 954816 | 100.000 | 100.000  |

**Supplementary Figure 51. Racemic (upper) and Enantioenriched (under) HPLC Traces for 5g.**

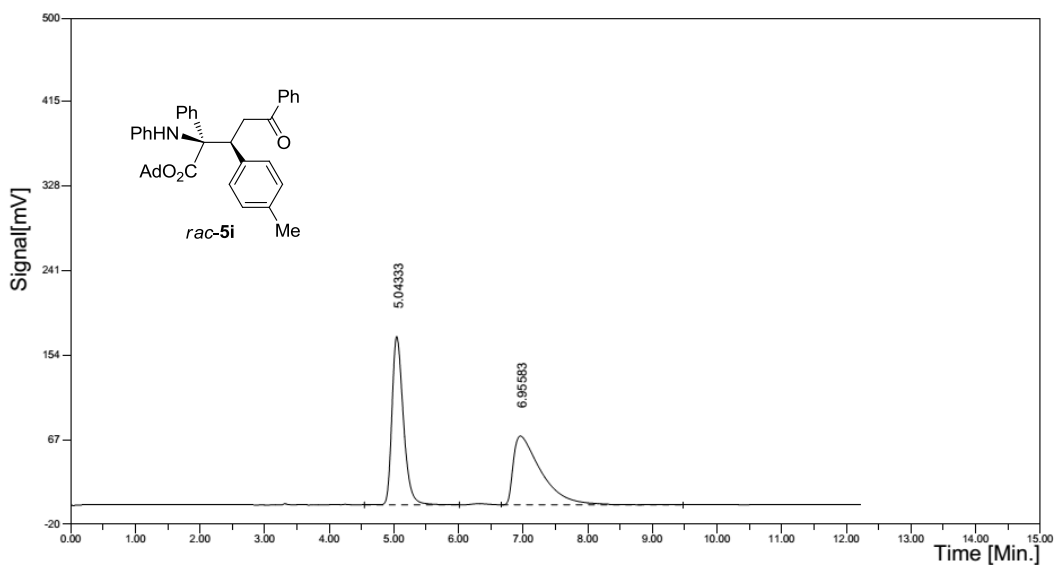

组分表

| #  | 组分名     | 保留时间(min) | 峰面积(mV.sec) | 面积百分比(%) |
|----|---------|-----------|-------------|----------|
| 1  | Unknown | 5.04333   | 2130.15     | 50.2019  |
| 2  | Unknown | 6.95583   | 2113.01     | 49.7981  |
| 合计 |         |           | 4243.16     | 100      |

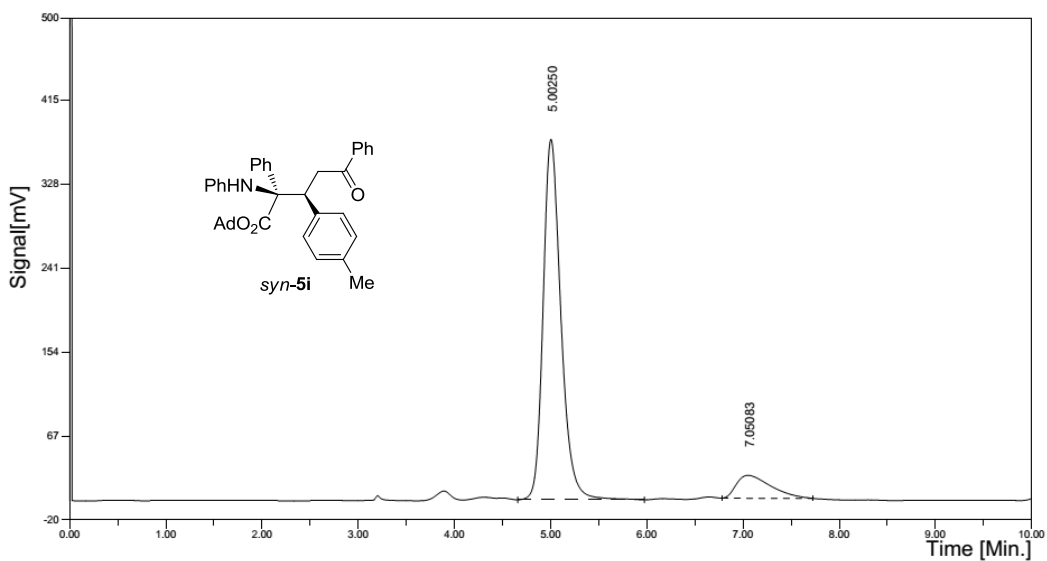

组分表

| #  | 组分名     | 保留时间(min) | 峰高(mV) | 峰面积(mV.sec) | 面积百分比(%) |
|----|---------|-----------|--------|-------------|----------|
| 1  | Unknown | 5.00250   | 373.56 | 4806.11     | 89.0627  |
| 2  | Unknown | 7.05083   | 23.72  | 590.21      | 10.9373  |
| 合计 |         |           | 397.28 | 5396.32     | 100      |

Supplementary Figure 52. Racemic (upper) and Enantioenriched (under) HPLC Traces for 5i.

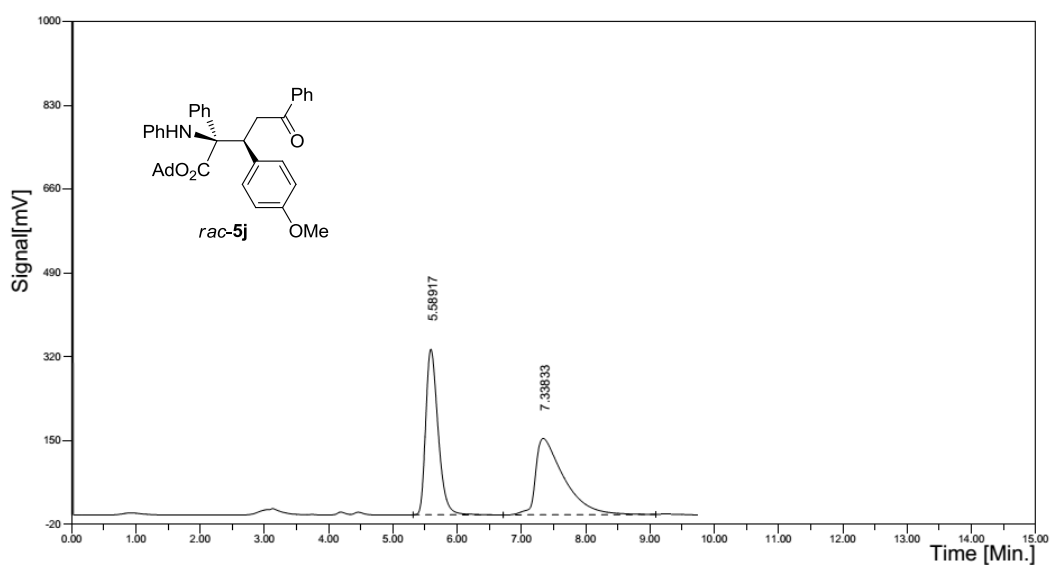

组分表

| #  | 组分名     | 保留时间 (min) | 峰面积 (mV. sec) | 面积百分比 (%) |
|----|---------|------------|---------------|-----------|
| 1  | Unknown | 5.58917    | 4469.52       | 48.8083   |
| 2  | Unknown | 7.33833    | 4687.78       | 51.1917   |
| 合计 |         |            | 9157.30       | 100       |

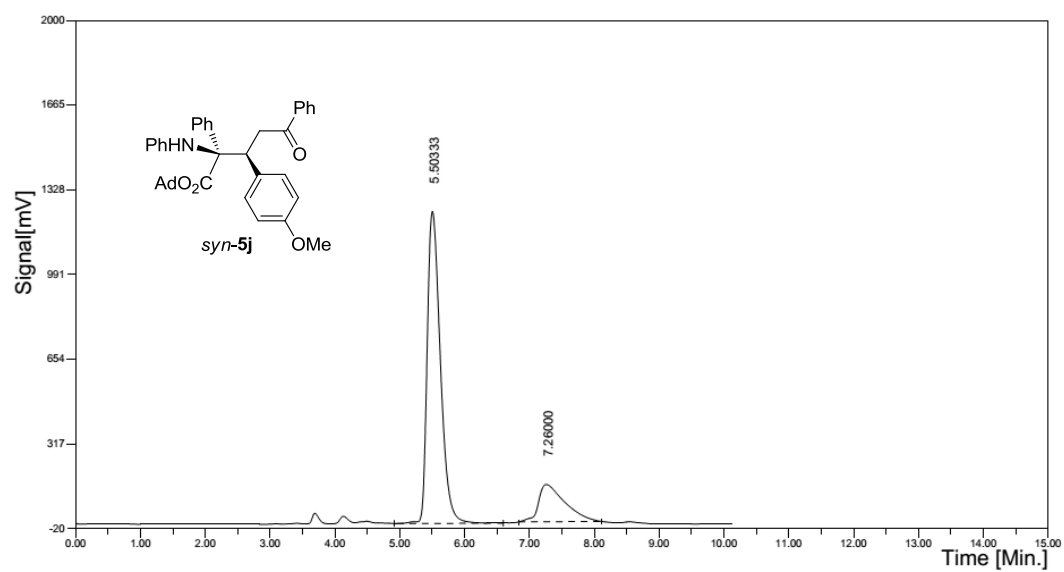

组分表

| #  | 组分名     | 保留时间 (min) | 峰面积 (mV. sec) | 面积百分比 (%) |
|----|---------|------------|---------------|-----------|
| 1  | Unknown | 5.50333    | 17408.27      | 80.5485   |
| 2  | Unknown | 7.26000    | 4203.88       | 19.4515   |
| 合计 |         |            | 21612.15      | 100       |

**Supplementary Figure 53. Racemic (upper) and Enantioenriched (under) HPLC Traces for 5j.**



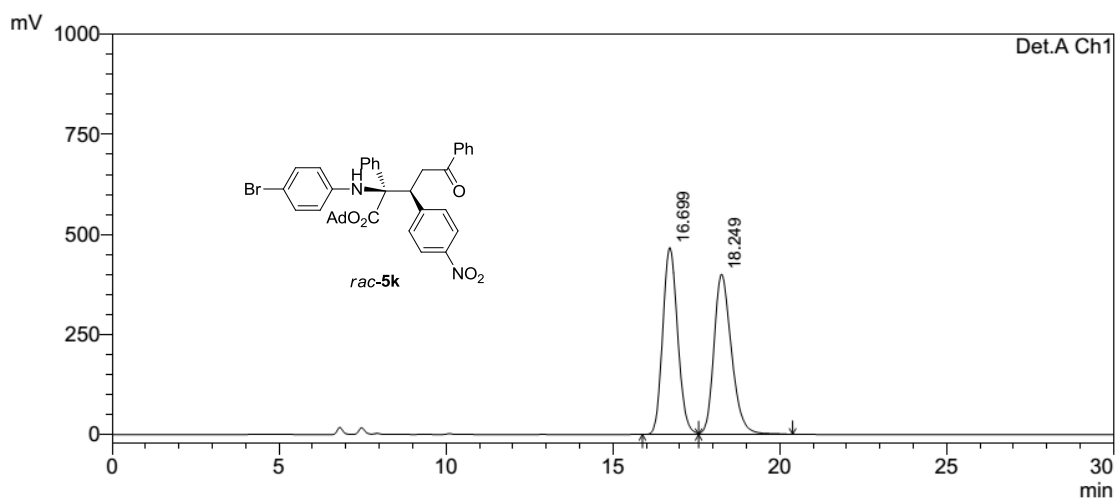

PeakTable

| Peak# | Ret. Time | Area     | Height | Area %  | Height % |
|-------|-----------|----------|--------|---------|----------|
| 1     | 16.699    | 14519789 | 467081 | 49.881  | 53.857   |
| 2     | 18.249    | 14589280 | 400180 | 50.119  | 46.143   |
| Total |           | 29109069 | 867262 | 100.000 | 100.000  |

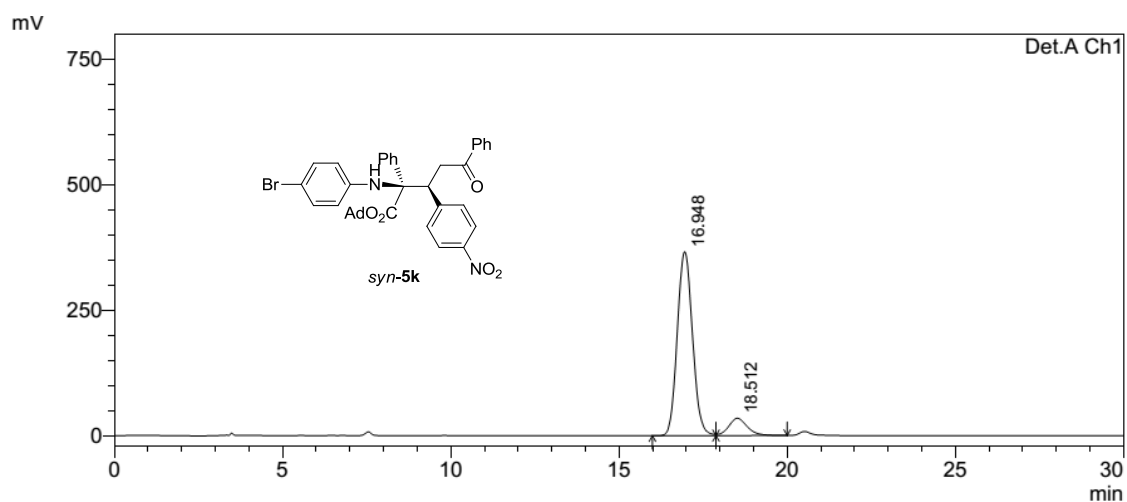

| Peak# | Ret. Time | Area     | Height | Area %  | Height % |
|-------|-----------|----------|--------|---------|----------|
| 1     | 16.948    | 11511287 | 366736 | 89.764  | 91.406   |
| 2     | 18.512    | 1312621  | 34480  | 10.236  | 8.594    |
| Total |           | 12823908 | 401216 | 100.000 | 100.000  |

**Supplementary Figure 54. Racemic (upper) and Enantioenriched (under) HPLC Traces for 5k.**

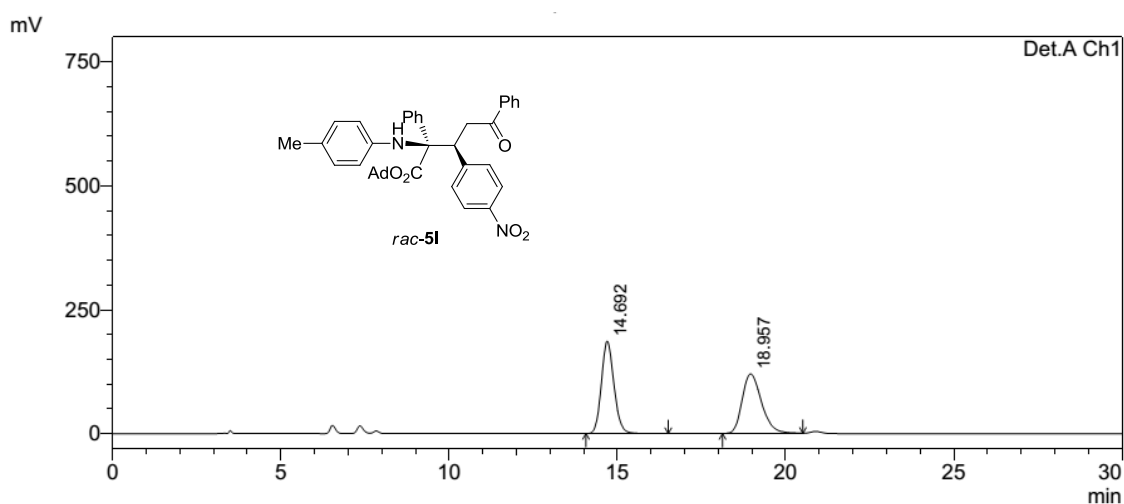

PeakTable

Detector A Ch1 254nm

| Peak# | Ret. Time | Area    | Height | Area %  | Height % |
|-------|-----------|---------|--------|---------|----------|
| 1     | 14.692    | 4832852 | 186465 | 50.202  | 60.741   |
| 2     | 18.957    | 4793880 | 120520 | 49.798  | 39.259   |
| Total |           | 9626732 | 306985 | 100.000 | 100.000  |

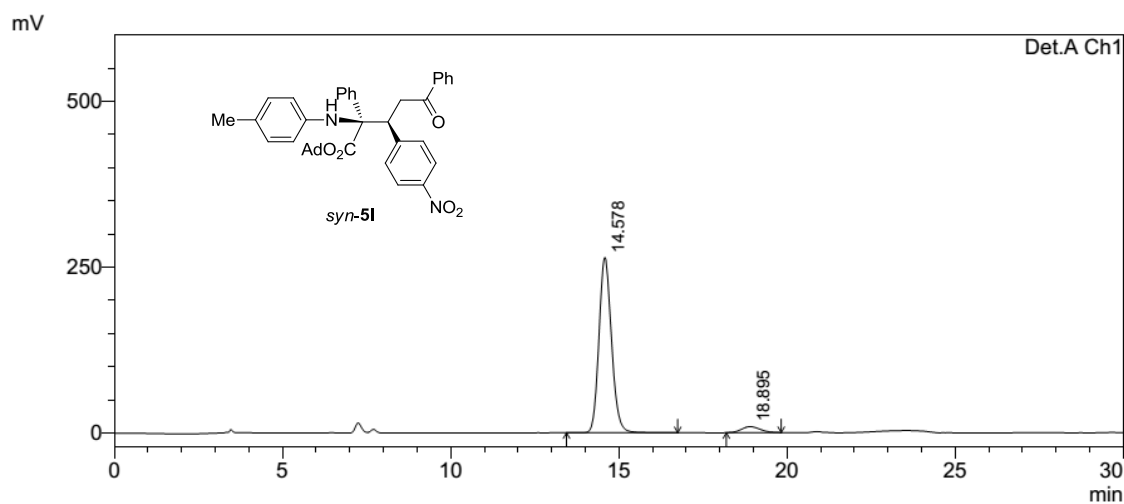

PeakTable

Detector A Ch1 254nm

| Peak# | Ret. Time | Area    | Height | Area %  | Height % |
|-------|-----------|---------|--------|---------|----------|
| 1     | 14.578    | 6841717 | 264277 | 95.100  | 96.659   |
| 2     | 18.895    | 352490  | 9134   | 4.900   | 3.341    |
| Total |           | 7194208 | 273411 | 100.000 | 100.000  |

**Supplementary Figure 55. Racemic (upper) and Enantioenriched (under) HPLC Traces for 5I.**

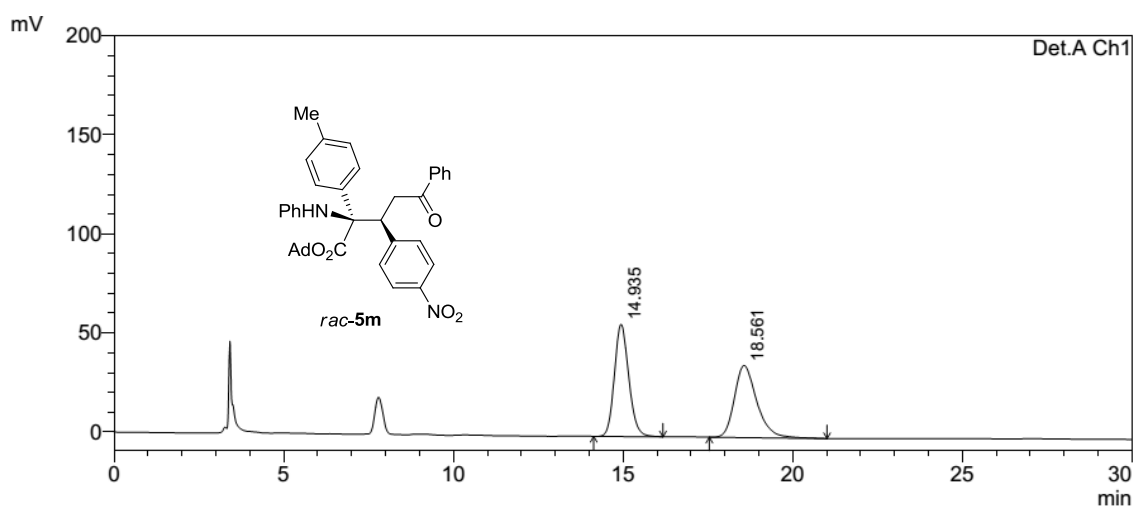

PeakTable

Detector A Ch1 254nm

| Peak# | Ret. Time | Area    | Height | Area %  | Height % |
|-------|-----------|---------|--------|---------|----------|
| 1     | 14.935    | 1669171 | 56607  | 49.866  | 60.854   |
| 2     | 18.561    | 1678134 | 36413  | 50.134  | 39.146   |
| Total |           | 3347305 | 93020  | 100.000 | 100.000  |

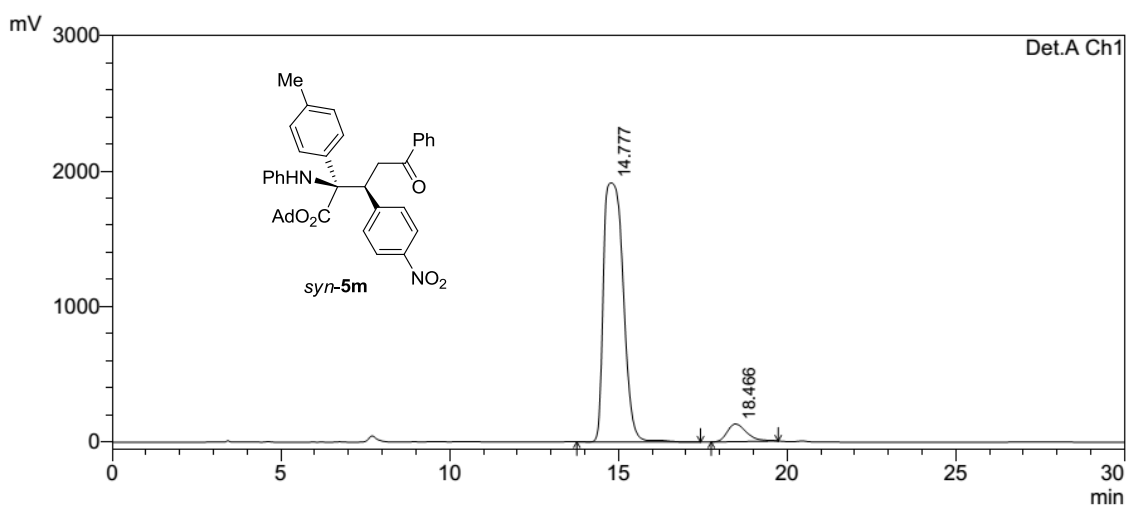

PeakTable

Detector A Ch1 254nm

| Peak# | Ret. Time | Area     | Height  | Area %  | Height % |
|-------|-----------|----------|---------|---------|----------|
| 1     | 14.777    | 77619768 | 1912432 | 93.692  | 93.632   |
| 2     | 18.466    | 5225603  | 130062  | 6.308   | 6.368    |
| Total |           | 82845371 | 2042494 | 100.000 | 100.000  |

**Supplementary Figure 56. Racemic (upper) and Enantioenriched (under) HPLC Traces for 5m.**

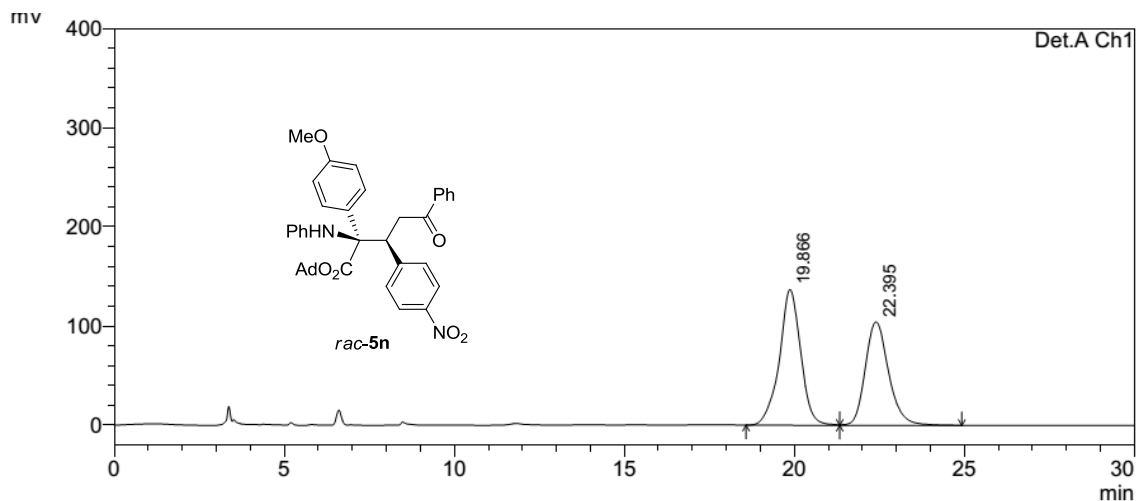

PeakTable

Detector A Ch1 254nm

| Peak# | Ret. Time | Area     | Height | Area %  | Height % |
|-------|-----------|----------|--------|---------|----------|
| 1     | 19.866    | 5957897  | 136857 | 54.407  | 56.752   |
| 2     | 22.395    | 4992767  | 104292 | 45.593  | 43.248   |
| Total |           | 10950664 | 241149 | 100.000 | 100.000  |

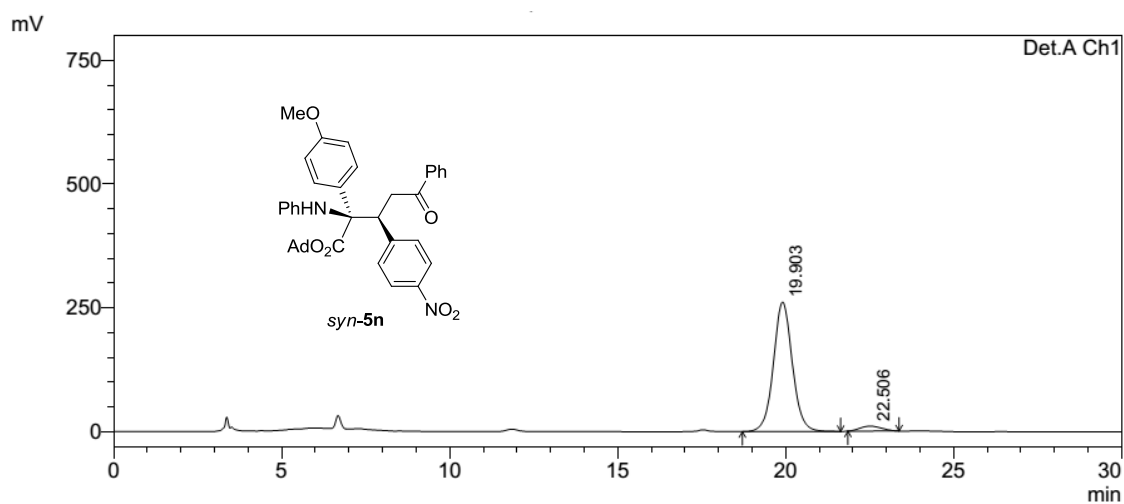

Detector A Ch1 254nm

| Peak# | Ret. Time | Area     | Height | Area %  | Height % |
|-------|-----------|----------|--------|---------|----------|
| 1     | 19.903    | 10242486 | 261749 | 95.812  | 96.301   |
| 2     | 22.506    | 447690   | 10055  | 4.188   | 3.699    |
| Total |           | 10690176 | 271804 | 100.000 | 100.000  |

**Supplementary Figure 57. Racemic (upper) and Enantioenriched (under) HPLC Traces for 5n.**

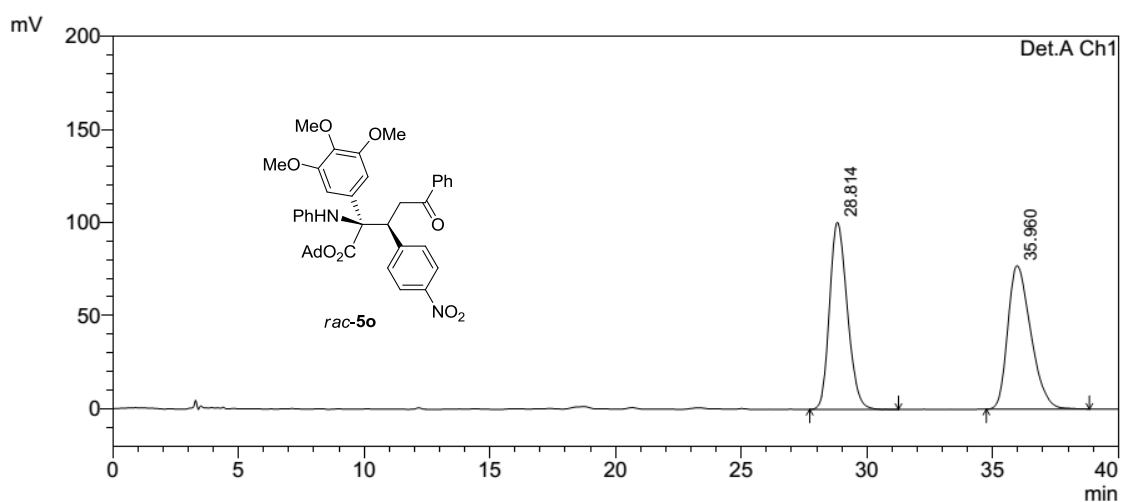

PeakTable

Detector A Ch1 254nm

| Peak# | Ret. Time | Area    | Height | Area %  | Height % |
|-------|-----------|---------|--------|---------|----------|
| 1     | 28.814    | 4915782 | 100478 | 49.974  | 56.563   |
| 2     | 35.960    | 4920988 | 77162  | 50.026  | 43.437   |
| Total |           | 9836770 | 177639 | 100.000 | 100.000  |

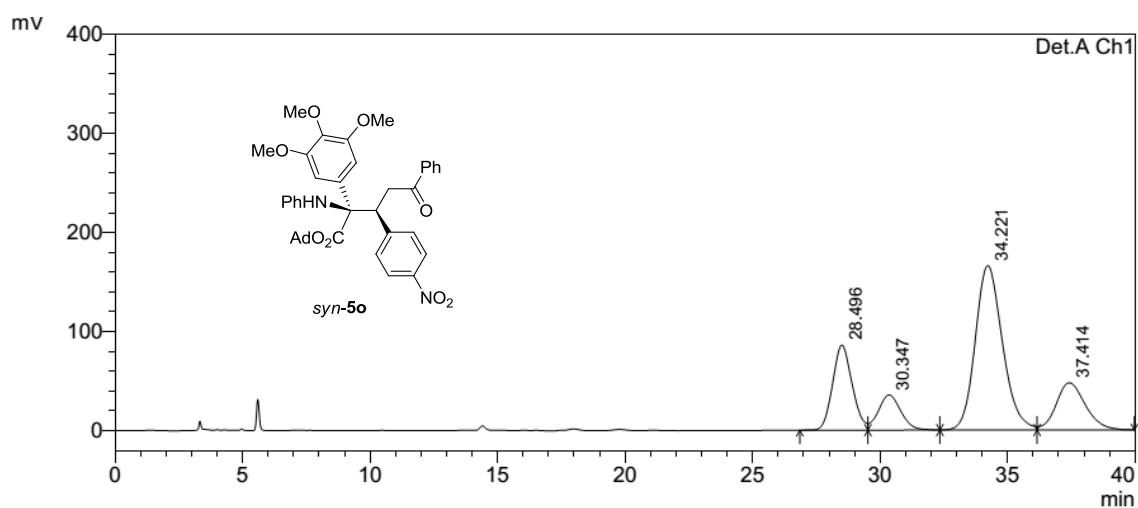

Detector A Ch1 254nm

| Peak# | Ret. Time | Area     | Height | Area %  | Height % |
|-------|-----------|----------|--------|---------|----------|
| 1     | 28.496    | 4573494  | 86024  | 19.987  | 25.670   |
| 2     | 30.347    | 2181909  | 35512  | 9.535   | 10.597   |
| 3     | 34.221    | 12325109 | 165991 | 53.862  | 49.533   |
| 4     | 37.414    | 3802067  | 47588  | 16.616  | 14.200   |
| Total |           | 22882579 | 335115 | 100.000 | 100.000  |

**Supplementary Figure 58. Racemic (upper) and Enantioenriched (under) HPLC Traces for 5o.**

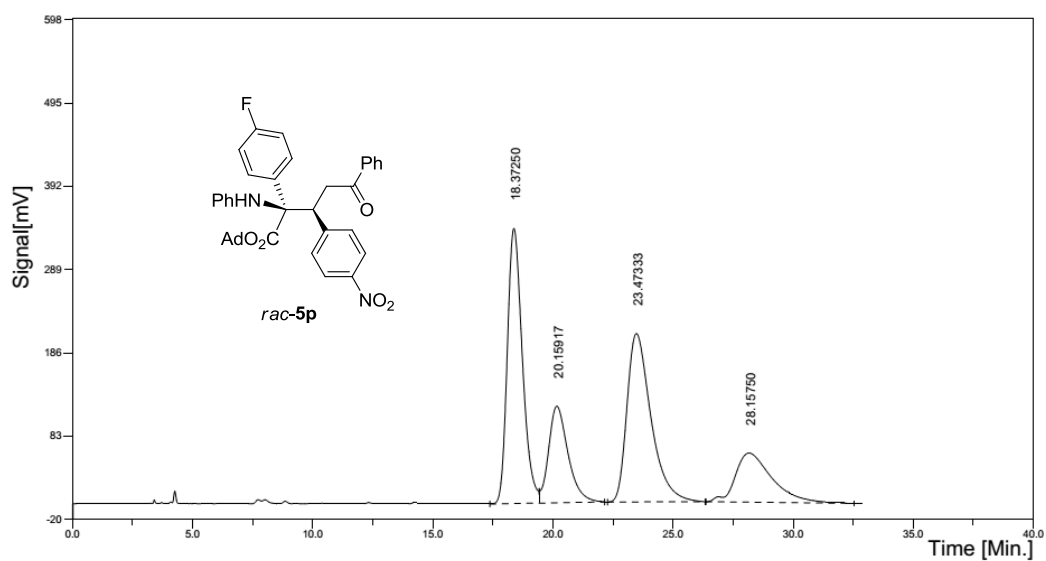

组分表

| # | 组分名     | 保留时间 (min) | 峰高 (mV) | 峰面积 (mV. sec) | 面积百分比 (%) | 样品含量 (%) |
|---|---------|------------|---------|---------------|-----------|----------|
| 1 | Unknown | 18.37250   | 340.09  | 14796.35      | 34.9050   | 0.0000   |
| 2 | Unknown | 20.15917   | 119.37  | 6721.79       | 15.8569   | 0.0000   |
| 3 | Unknown | 23.47333   | 208.24  | 14441.80      | 34.0686   | 0.0000   |
| 4 | Unknown | 28.15750   | 60.71   | 6430.40       | 15.1695   | 100.0000 |

合计

728.41 42390.34 100

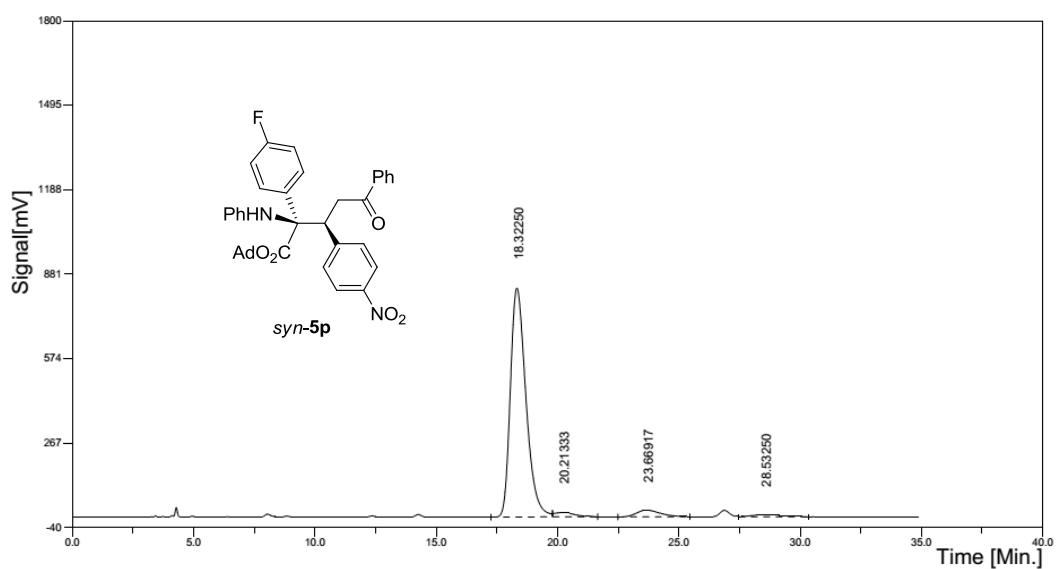

组分表

| # | 组分名     | 保留时间 (min) | 峰高 (mV) | 峰面积 (mV. sec) | 面积百分比 (%) |
|---|---------|------------|---------|---------------|-----------|
| 1 | Unknown | 18.32250   | 831.28  | 37080.48      | 92.1988   |
| 2 | Unknown | 20.21333   | 16.25   | 900.04        | 2.2379    |
| 3 | Unknown | 23.66917   | 24.25   | 1653.98       | 4.1125    |
| 4 | Unknown | 28.53250   | 6.87    | 583.48        | 1.4508    |

合计

878.65 40217.98 100

Supplementary Figure 59. Racemic (upper) and Enantioenriched (under) HPLC Traces for 5p.

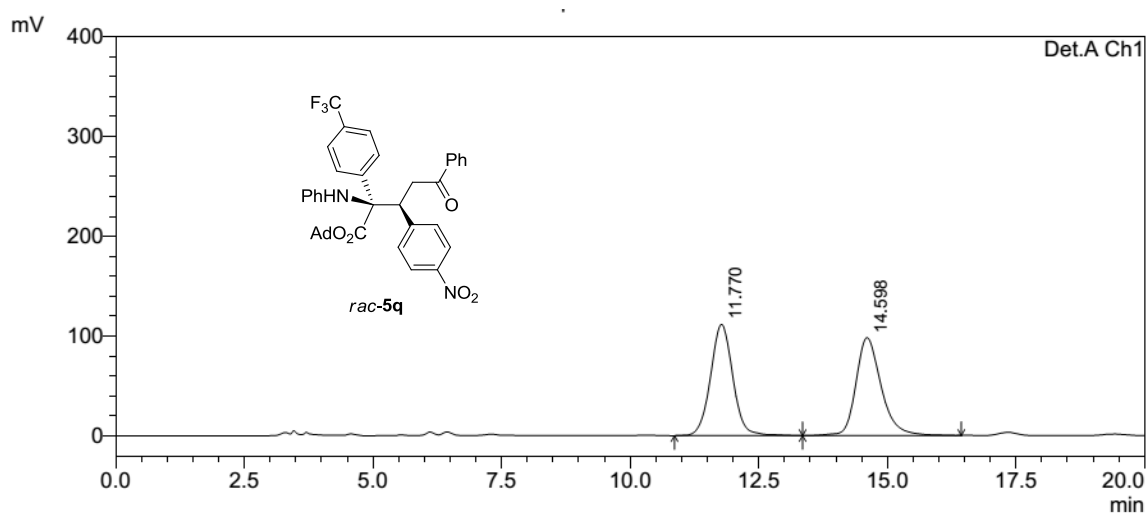

PeakTable

| Peak# | Ret. Time | Area    | Height | Area %  | Height % |
|-------|-----------|---------|--------|---------|----------|
| 1     | 11.770    | 3360887 | 111672 | 50.123  | 53.226   |
| 2     | 14.598    | 3344350 | 98134  | 49.877  | 46.774   |
| Total |           | 6705237 | 209806 | 100.000 | 100.000  |

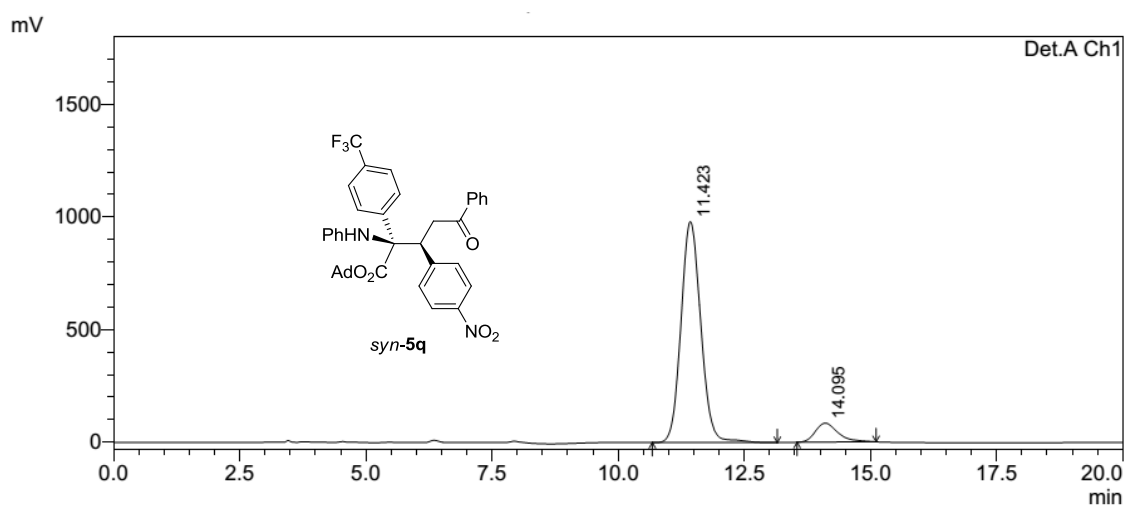

PeakTable

| Peak# | Ret. Time | Area     | Height  | Area %  | Height % |
|-------|-----------|----------|---------|---------|----------|
| 1     | 11.423    | 26800719 | 981177  | 91.036  | 92.096   |
| 2     | 14.095    | 2638948  | 84213   | 8.964   | 7.904    |
| Total |           | 29439667 | 1065390 | 100.000 | 100.000  |

**Supplementary Figure 60. Racemic (upper) and Enantioenriched (under) HPLC Traces for 5q.**

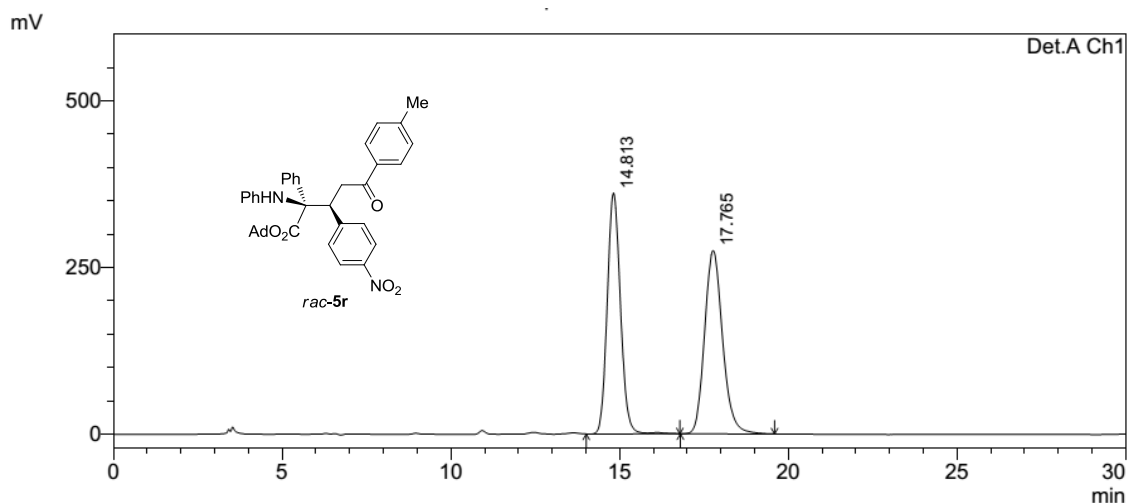

Detector A Ch1 254nm

| Peak# | Ret. Time | Area     | Height | Area %  | Height % |
|-------|-----------|----------|--------|---------|----------|
| 1     | 14.813    | 9847174  | 361677 | 49.116  | 56.818   |
| 2     | 17.765    | 10201746 | 274882 | 50.884  | 43.182   |
| Total |           | 20048921 | 636559 | 100.000 | 100.000  |

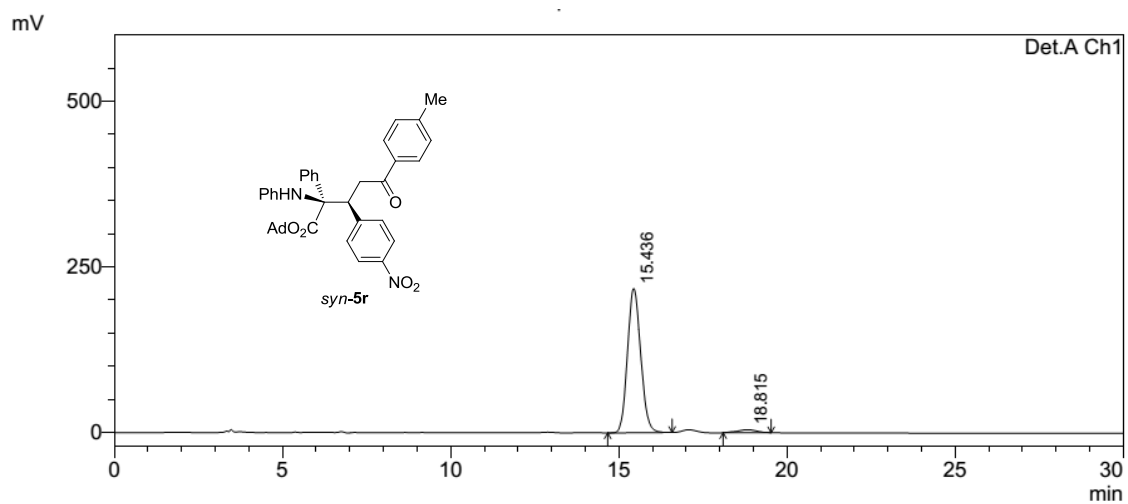

PeakTable

Detector A Ch1 254nm

| Peak# | Ret. Time | Area    | Height | Area %  | Height % |
|-------|-----------|---------|--------|---------|----------|
| 1     | 15.436    | 5949027 | 217885 | 96.972  | 97.922   |
| 2     | 18.815    | 185741  | 4624   | 3.028   | 2.078    |
| Total |           | 6134767 | 222509 | 100.000 | 100.000  |

Supplementary Figure 61. Racemic (upper) and Enantioenriched (under) HPLC Traces for 5r.



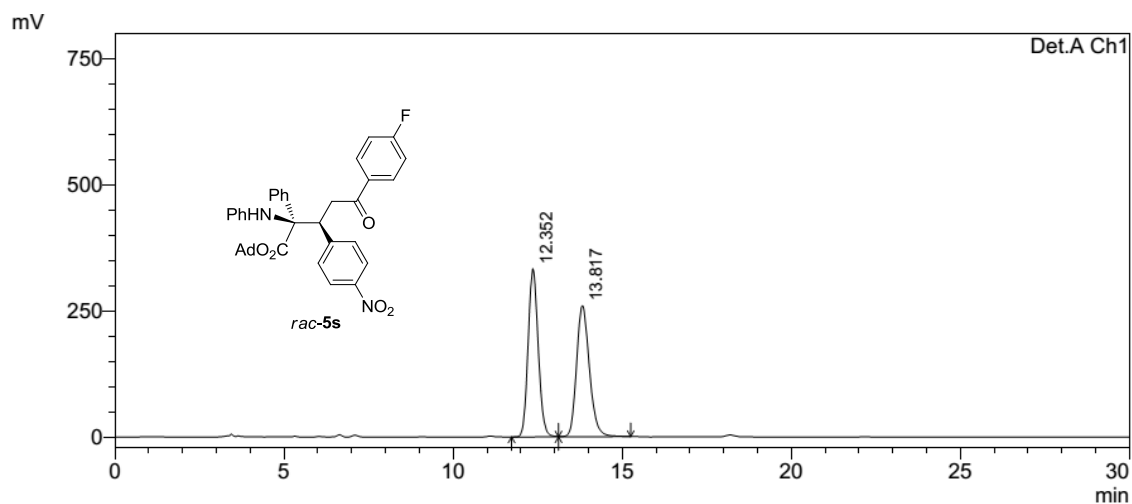

Detector A Ch1 254nm

| Peak# | Ret. Time | Area     | Height | Area %  | Height % |
|-------|-----------|----------|--------|---------|----------|
| 1     | 12.352    | 6933843  | 333912 | 50.124  | 56.207   |
| 2     | 13.817    | 6899638  | 260167 | 49.876  | 43.793   |
| Total |           | 13833481 | 594079 | 100.000 | 100.000  |

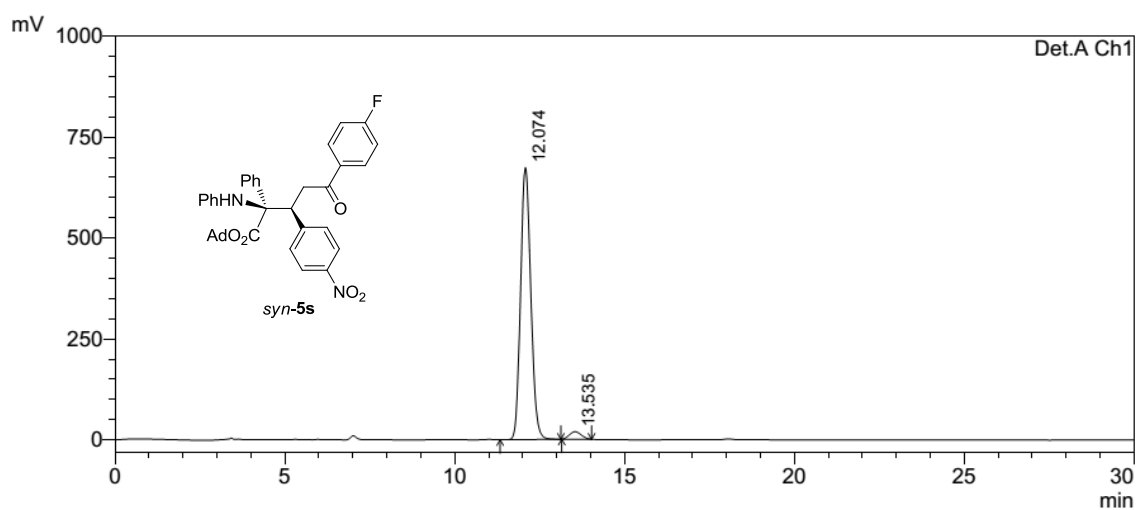

PeakTable

| Peak# | Ret. Time | Area     | Height | Area %  | Height % |
|-------|-----------|----------|--------|---------|----------|
| 1     | 12.074    | 14067276 | 674269 | 96.907  | 97.318   |
| 2     | 13.535    | 448954   | 18585  | 3.093   | 2.682    |
| Total |           | 14516230 | 692854 | 100.000 | 100.000  |

**Supplementary Figure 62. Racemic (upper) and Enantioenriched (under) HPLC Traces for 5s.**

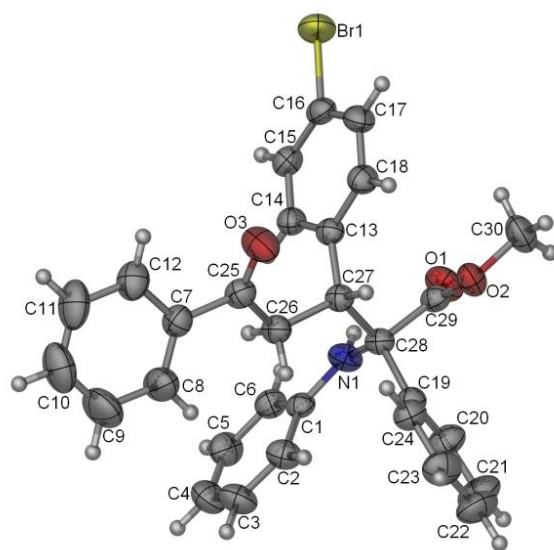

**Supplementary Figure 63. Molecular structure and atom numbering scheme for 5a. (CCDC 981292)**

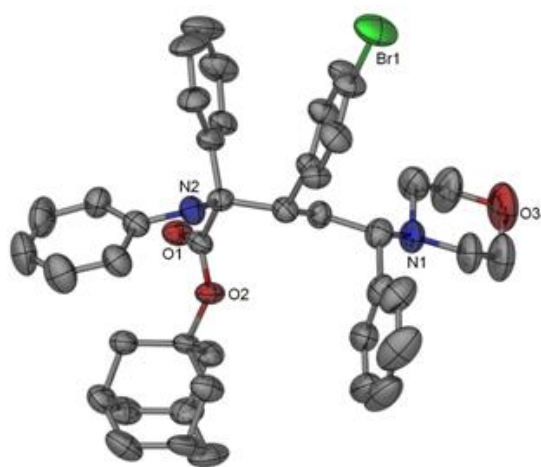

**Supplementary Figure 64. Molecular structure and atom numbering scheme for 11b. (CCDC 999727)**

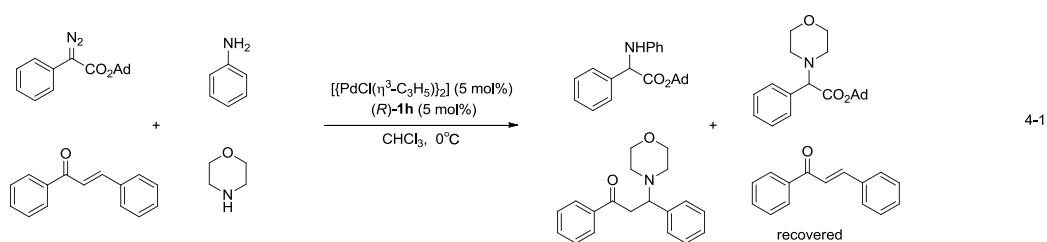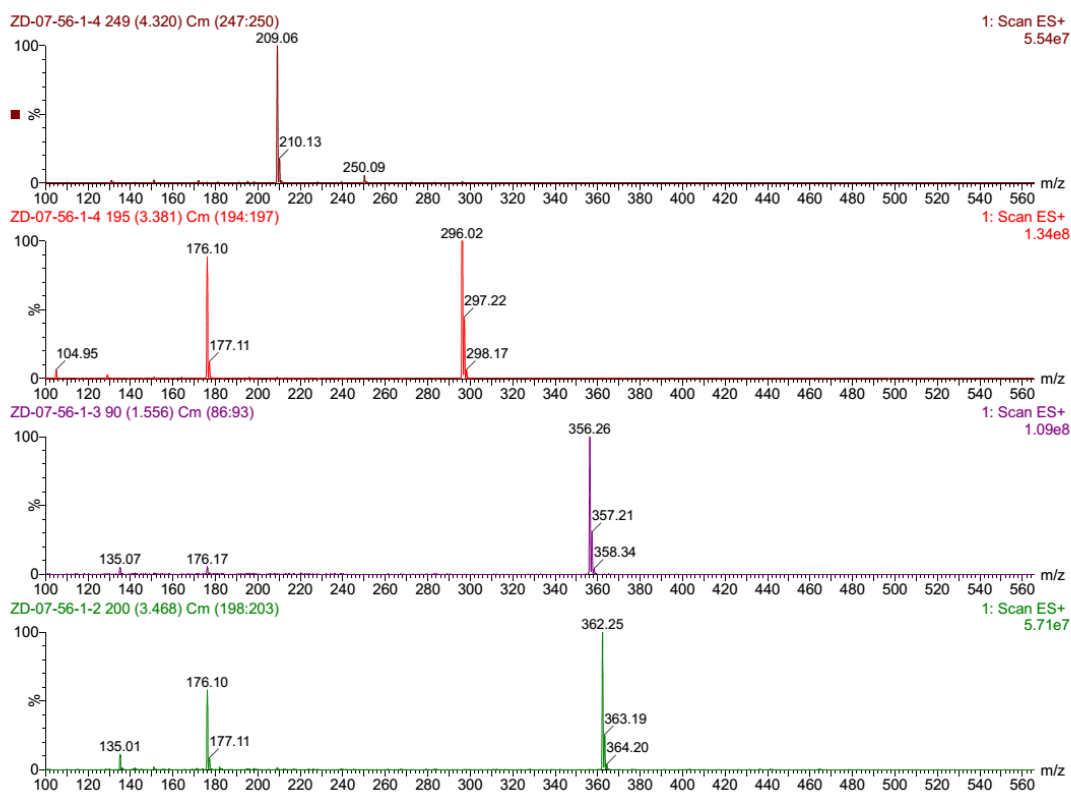

**Supplementary Figure 65. Species detection of eq. (4-1) by LC-MS.** In the equation 4-2, morpholine was used to activate the chalcone under the standard condition. No desired product 5 was detected as well. N-H insertion product from diazo compound and aniline, 1,4-addition product of morpholine to chalcone were detected by LC-MS. In this reaction, palladium catalyst was poisoned by morpholine leading to slow decomposition of diazo compound and the reaction became more complicated.

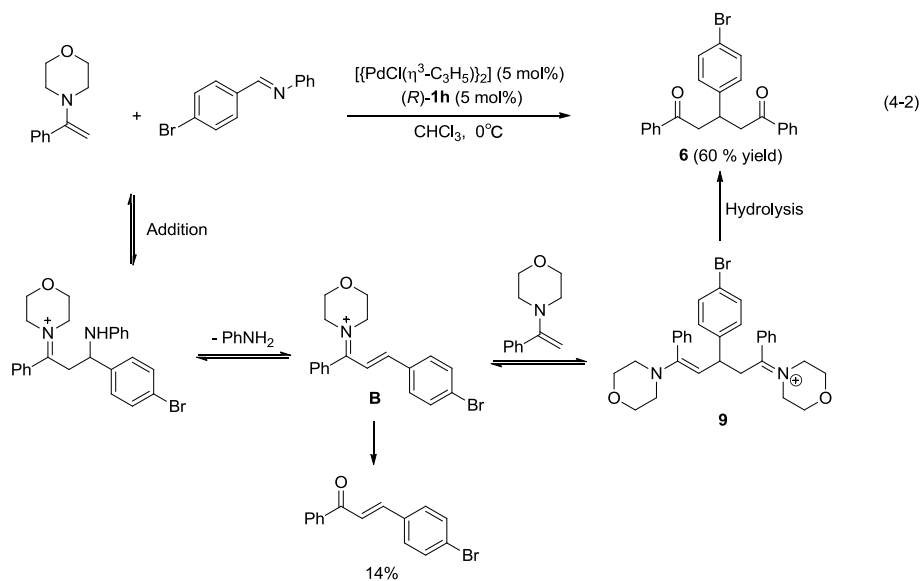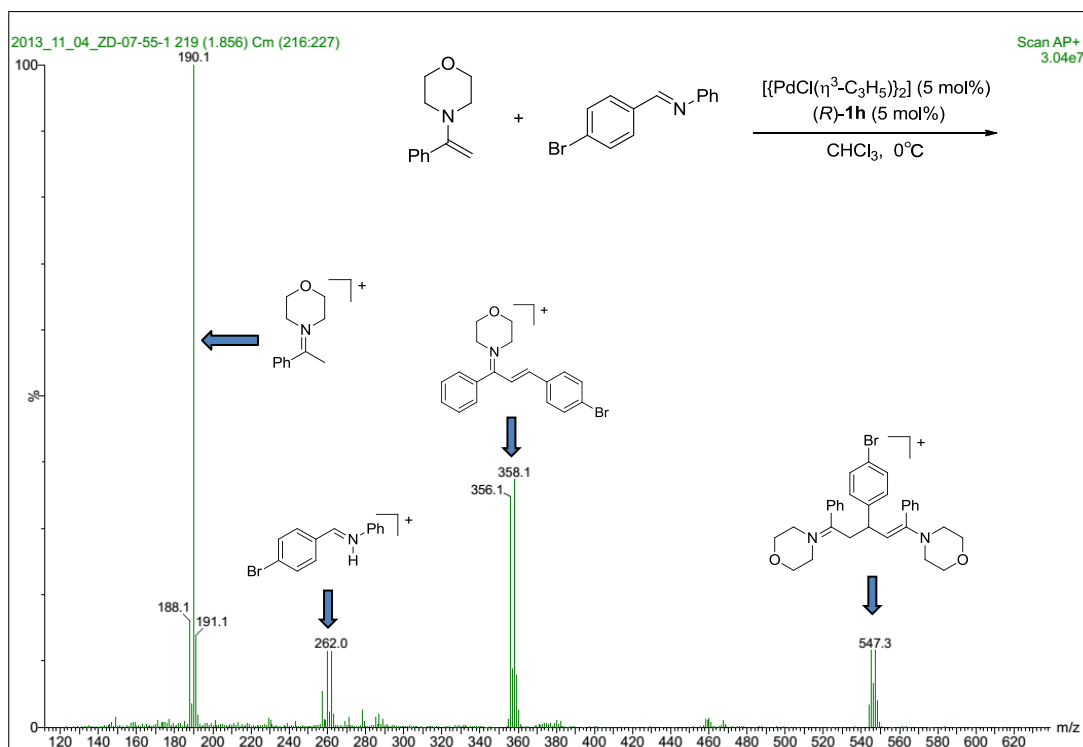

**Supplementary Figure 66. ASAP-MS of the reaction in eq.(4-2).** In the ASAP-MS spectrum (Supplementary Figure 66), iminium **B** and the precursor (**9**) of **6** were detected by employing the reaction mixture for the mass spectrum without any work-up procedure. These provided direct and strong evidence for the existence of iminium intermediate **B**.

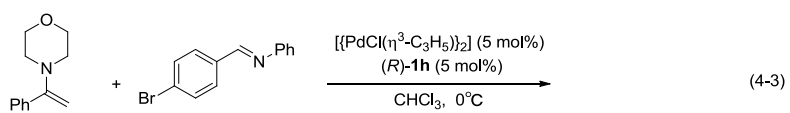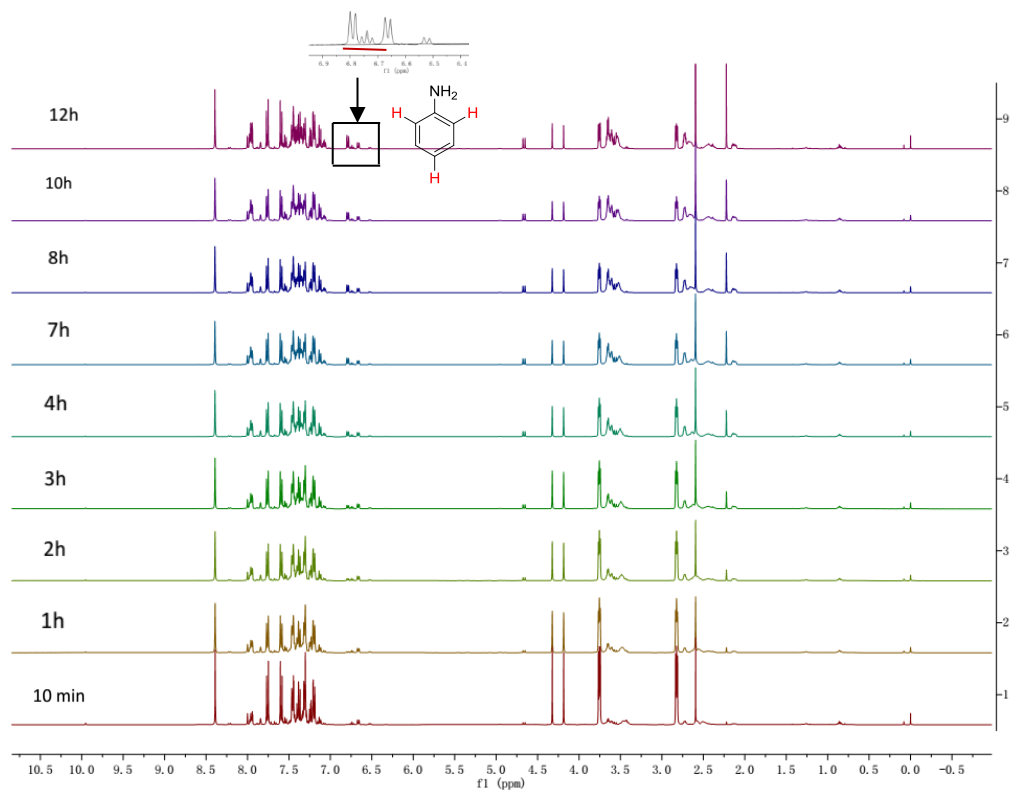

**Supplementary Figure 67.  $^1\text{H}$  NMR of the reaction mixture in eq.(4-3).** In the  $^1\text{H}$  NMR of the reaction mixture (reaction performed in an NMR tube), the reaction was tracked. Aniline was detected and found to increase as reaction in process.

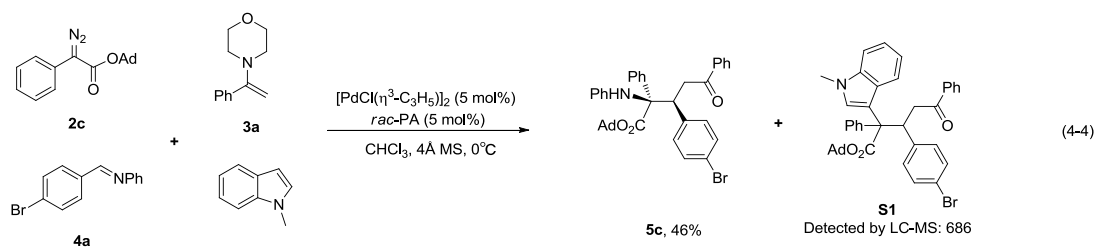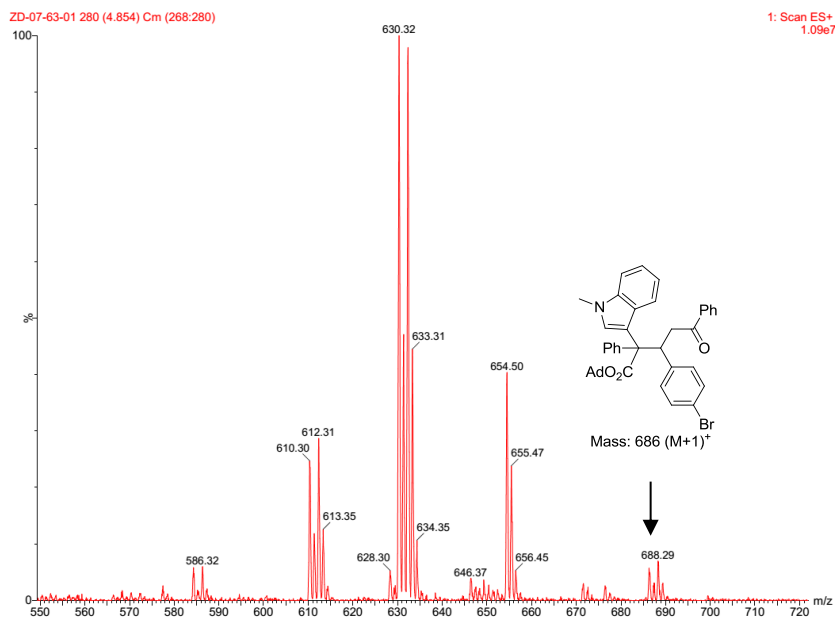

**Supplementary Figure 68. Mass spectrum of S1.** In eq.(4-4), N-methyl indole was added and the cross-coupling product S1 was detected by LC-MS. This result undoubtedly supported the cleavage of C-N bond.

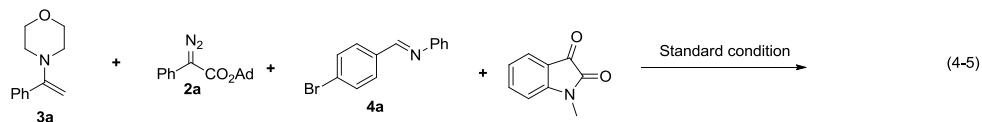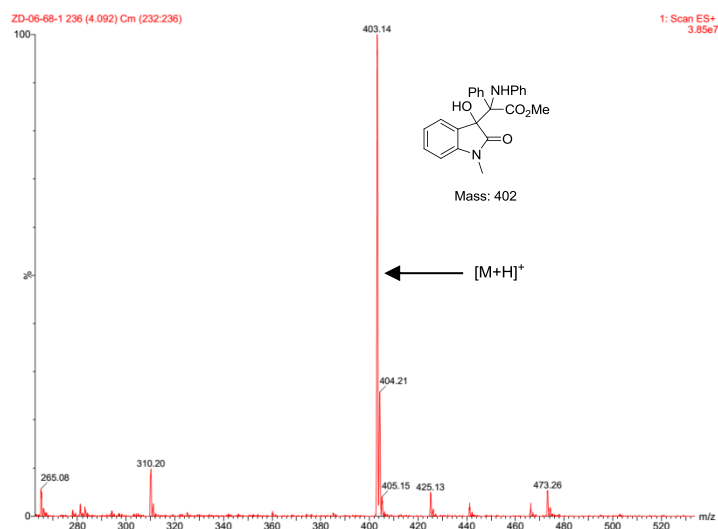

**Supplementary Figure 69. Mass spectrum of eq.(4-5)(partial).** To detect the cleavage of aniline, other acceptors such as isatin was added to the reaction. The aldol reaction products by trapping the ammonium ylides were detected by LR-MS.

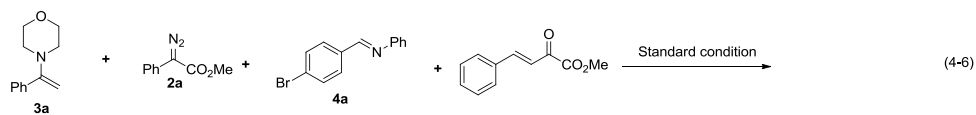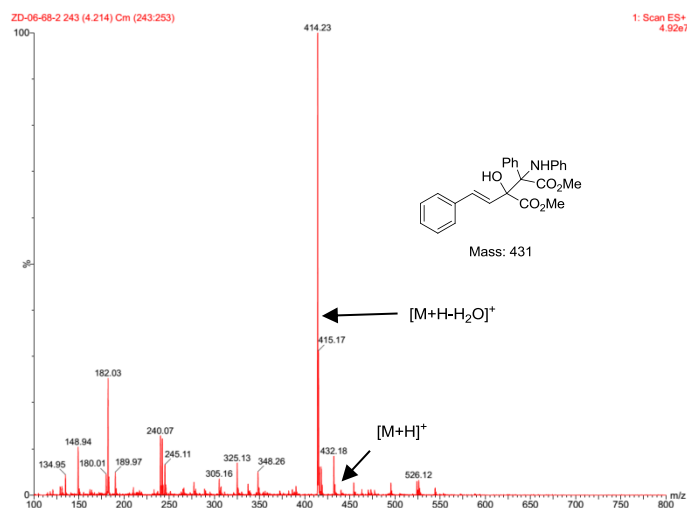

**Supplementary Figure 70. Mass spectrum of eq.(4-6)(partial).** To detect the cleavage of aniline, other acceptors such as  $\alpha,\beta$ -unsaturated keto ester were added to the reaction. The aldol reaction products by trapping the ammonium ylides were detected by LR-MS.

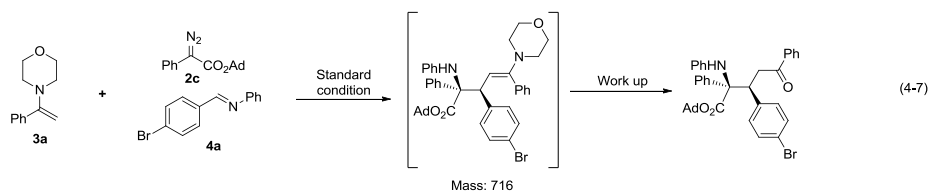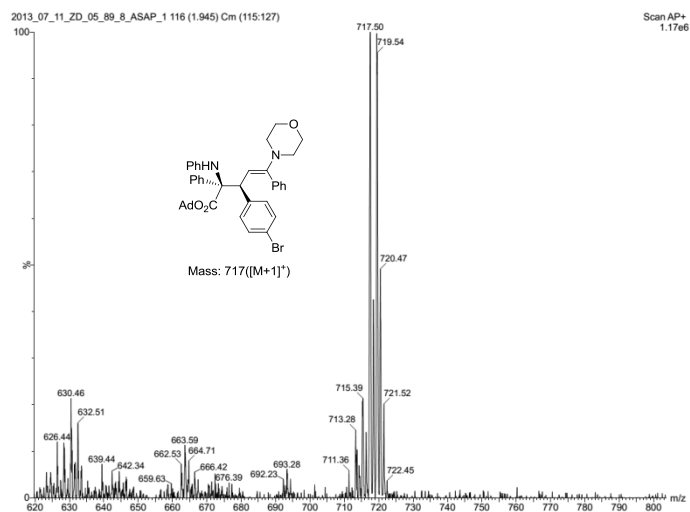

**Supplementary Figure 71. ASAP-Mass spectrum of enamine intermediate G.** To determine the product of aza-Michael addition before hydrolysis, the crude reaction mixture was subjected to the ASAP-MS spectrum without any work-up procedure. The enamine intermediate **G** was detected. The enamine intermediate can be transformed to the **11a** and **11b** by reduction as shown in the text.



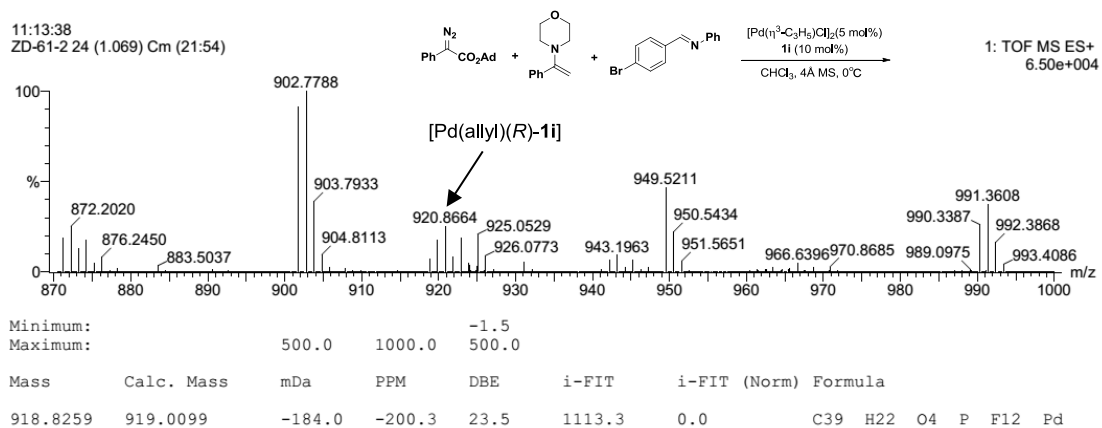

**Supplementary Figure 72. HRMS spectrum for crude mixture.** To investigate the active catalytic species, the reaction mixture was subjected to the HRMS. The palladium phosphate complex was detected.

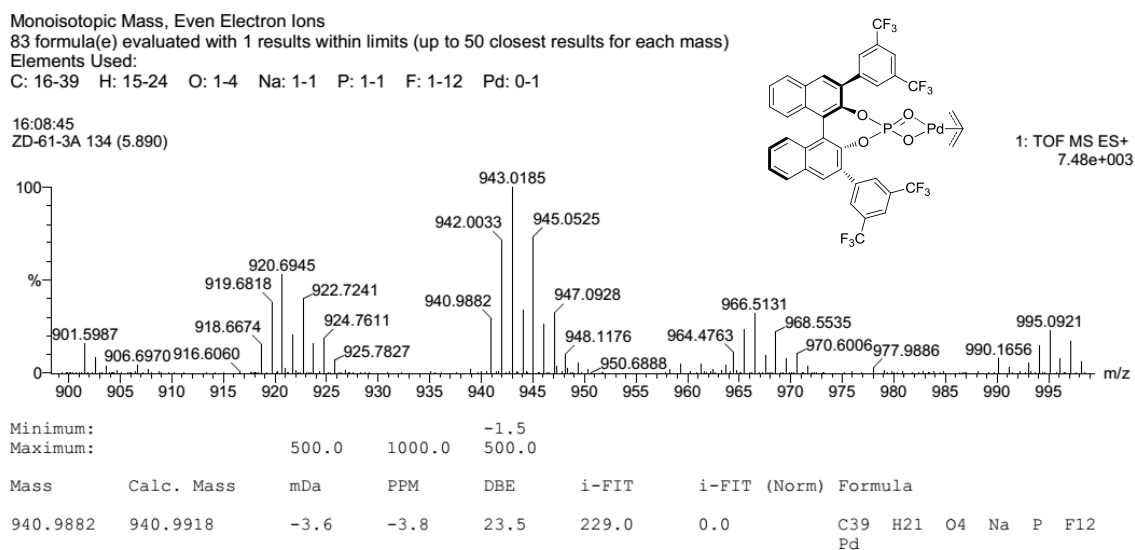

**Supplementary Figure 73. HRMS of prepared [Pd(allyl)(R)-1i]**

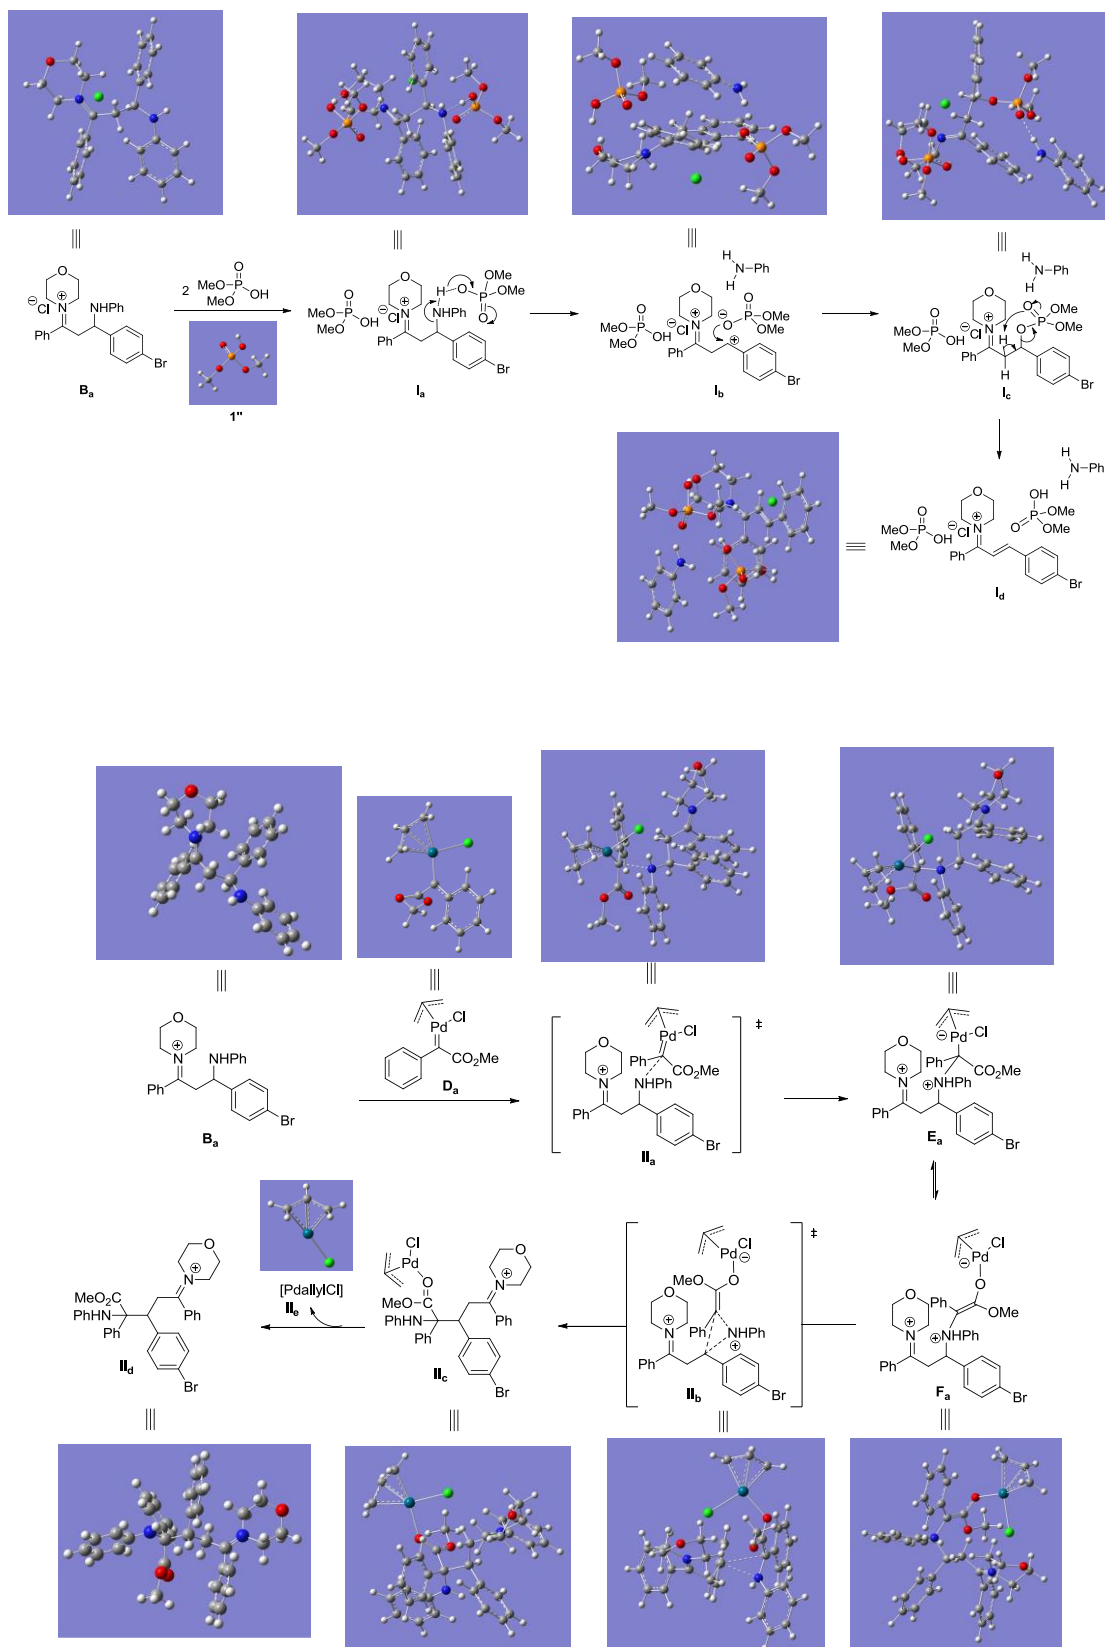

**Supplementary Figure 74. (a)** The pathway for the formation of iminium. **(b)** The pathway for the carbene-assisted rearrangement.

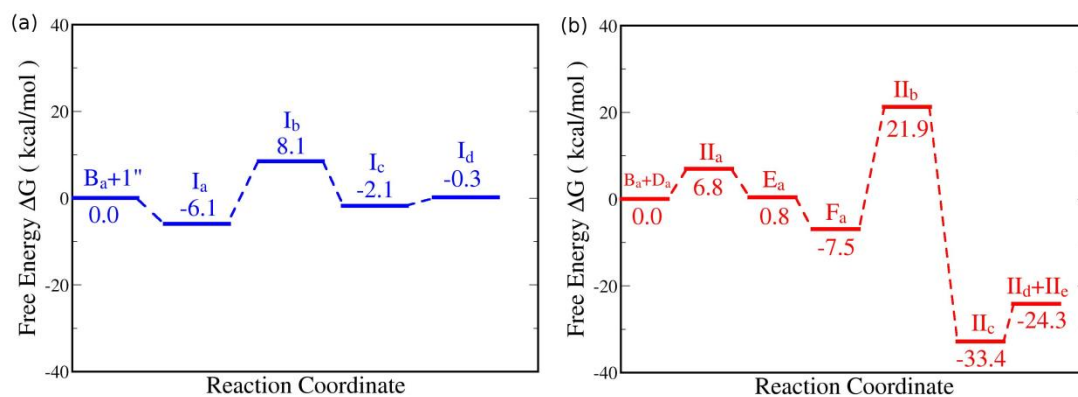

**Supplementary Figure 75.** (a) The blue curve denotes the calculated free energy profile for the elimination process of protonated reactant  $B_a$ . (b) The red curve denotes the calculated free energy profile of the pathway that  $B_a$  reacts with carbenoid  $D_a$  to produce the final products via a C-N cleavage and C-C bond formation.

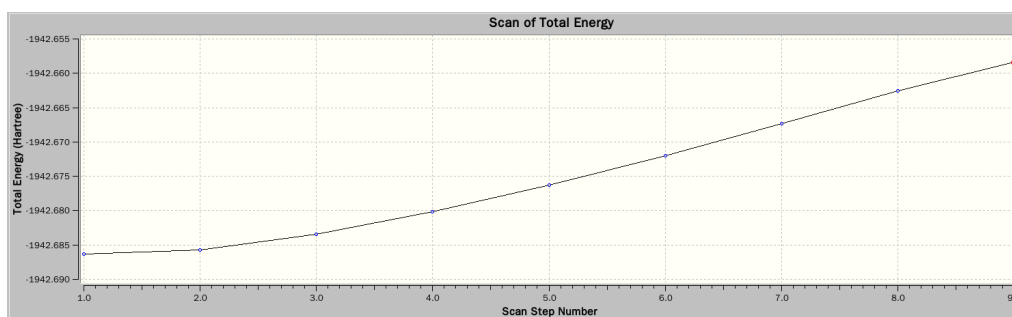

**Supplementary Figure 76.** The potential energy scan of the increased C-N bond distance in  $I_a$ .

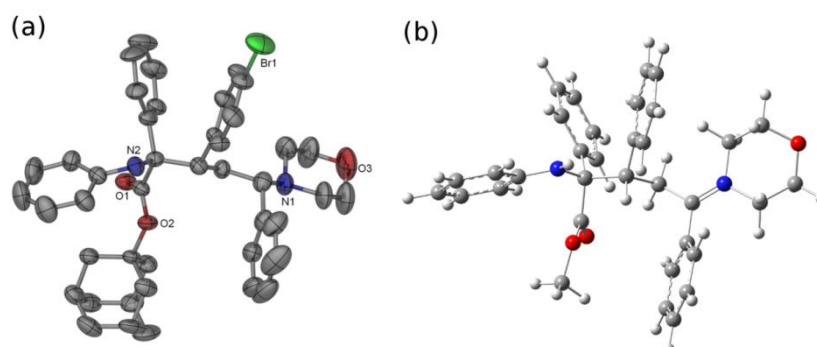

**Supplementary Figure 77.** (a) The X-ray crystal structure of  $11b$ . (b) The calculated structure  $II_a$  with DFT.

## Supplementary Tables

**Supplementary Table 1.** Enantioselective investigation of three-component reaction of **2**, enamine **3a** and imine **4a**\*

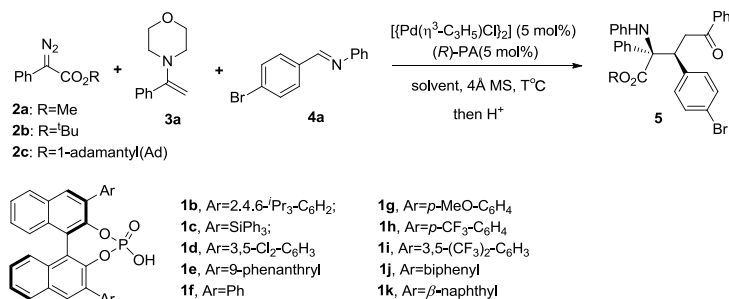

| entry | <b>2</b>  | solvent                         | PA        | T/°C       | yield/% <sup>†</sup> | dr( <i>syn:anti</i> ) <sup>‡</sup> | ee/% <sup>§</sup> |
|-------|-----------|---------------------------------|-----------|------------|----------------------|------------------------------------|-------------------|
| 1     | <b>2b</b> | CH <sub>2</sub> Cl <sub>2</sub> | <b>1b</b> | 0          | ---                  | ---                                | ---               |
| 2     | <b>2b</b> | CH <sub>2</sub> Cl <sub>2</sub> | <b>1c</b> | 0          | ---                  | ---                                | ---               |
| 3     | <b>2b</b> | CH <sub>2</sub> Cl <sub>2</sub> | <b>1d</b> | 0          | 48                   | >95:5                              | 50                |
| 4     | <b>2b</b> | CH <sub>2</sub> Cl <sub>2</sub> | <b>1f</b> | 0          | 55                   | >95:5                              | 27                |
| 5     | <b>2b</b> | CH <sub>2</sub> Cl <sub>2</sub> | <b>1g</b> | 0          | 60                   | >95:5                              | -35               |
| 6     | <b>2b</b> | CH <sub>2</sub> Cl <sub>2</sub> | <b>1h</b> | 0          | 55                   | >95:5                              | -35               |
| 7     | <b>2b</b> | CH <sub>2</sub> Cl <sub>2</sub> | <b>1j</b> | 0          | 49                   | >95:5                              | -33               |
| 8     | <b>2b</b> | CH <sub>2</sub> Cl <sub>2</sub> | <b>1k</b> | 0          | 41                   | >95:5                              | <5                |
| 9     | <b>2b</b> | (CH <sub>2</sub> Cl)<br>2       | <b>1i</b> | 0          | 35                   | >95:5                              | 65                |
| 10    | <b>2b</b> | Toluene                         | <b>1i</b> | 0          | --                   | --                                 | --                |
| 11    | <b>2b</b> | THF                             | <b>1i</b> | 0          | --                   | --                                 | --                |
| 12    | <b>2b</b> | <b>CHCl<sub>3</sub></b>         | <b>1i</b> | <b>-15</b> | <b>56</b>            | <b>&gt;95:5</b>                    | <b>83</b>         |
| 13    | <b>2b</b> | CHCl <sub>3</sub>               | <b>1i</b> | -35        | 48                   | >95:5                              | 85                |
| 14    | <b>2c</b> | CHCl <sub>3</sub>               | <b>1b</b> | 0          | 52                   | >95:5                              | 36                |
| 15    | <b>2c</b> | CHCl <sub>3</sub>               | <b>1c</b> | 0          | 48                   | >95:5                              | <3                |
| 16    | <b>2c</b> | CHCl <sub>3</sub>               | <b>1d</b> | 0          | 55                   | >95:5                              | 77                |
| 17    | <b>2c</b> | CHCl <sub>3</sub>               | <b>1e</b> | 0          | 53                   | >95:5                              | 10                |
| 18    | <b>2c</b> | CHCl <sub>3</sub>               | <b>1f</b> | 0          | 58                   | >95:5                              | 39                |
| 19    | <b>2c</b> | CHCl <sub>3</sub>               | <b>1g</b> | 0          | 49                   | >95:5                              | 38                |
| 20    | <b>2c</b> | CHCl <sub>3</sub>               | <b>1h</b> | 0          | --                   | --                                 | --                |
| 21    | <b>2c</b> | CHCl <sub>3</sub>               | <b>1j</b> | 0          | 60                   | >95:5                              | 34                |
| 22    | <b>2c</b> | CHCl <sub>3</sub>               | <b>1k</b> | 0          | 59                   | >95:5                              | 10                |
| 23    | <b>2c</b> | CH <sub>2</sub> Cl <sub>2</sub> | <b>1i</b> | 0          | 45                   | >95:5                              | 64                |

|    |           |                   |           |     |    |       |    |
|----|-----------|-------------------|-----------|-----|----|-------|----|
| 24 | <b>2c</b> | Toluene           | <b>1i</b> | 0   | 38 | >95:5 | 86 |
| 25 | <b>2c</b> | xylene            | <b>1i</b> | 0   | 41 | >95:5 | 86 |
| 26 | <b>2c</b> | THF               | <b>1i</b> | 0   | -- | --    | -- |
| 27 | <b>2c</b> | Et <sub>2</sub> O | <b>1i</b> | 0   | 43 | >95:5 | 77 |
| 28 | <b>2c</b> | CHCl <sub>3</sub> | <b>1i</b> | -30 | 39 | >95:5 | 88 |
| 29 | <b>2c</b> | Toluene           | <b>1i</b> | -10 | 35 | >95:5 | 90 |

\* According to General procedure 1, 0.2 mmol scale.

† Isolated yields.

‡ Determined by <sup>1</sup>H NMR analysis of crude mixture.

§ determined by chiral HPLC analysis.

|| Running over 48 hrs.

## Supplementary Discussion

### DFT calculations

All the calculations of geometry optimizations were performed in the G09 software package<sup>3</sup> with the M06<sup>4</sup> method combined with the Lanl2dz basis set<sup>5</sup>. The frequency analysis was also performed to validate the energy minima and transition states. The solvent effects of chloroform were evaluated using the PCM model<sup>6</sup> at the M06/Lanl2dz level based on the gas-phase optimized structures. In this section, all discussed energies are Gibbs free energies calculated from frequency analysis at the temperature 298 K, including the corrections of solvation free energies estimated from the PCM model.

Except for the mechanism we proposed in the text, another pathways for the access to the final compound are possible. In order to get more information about the mechanism, DFT calculations were carried out. For the bond cleavage, modification and reassembly, we simplified the process and considered the first step, Mannich reaction. The formation of iminium is proposed in Supplementary Figure 74 (a), and the calculated energy profiles are presented in Supplementary Figure 11. The phosphoric acid is simplified as **1''** shown in Supplementary Figure 74 (a). In the Supplementary Figure 74(b), another possible mechanism, that the adduct **B<sub>a</sub>** reacts with carbenoid and then undergoes C-N bond cleavage and C-C bond formation, is also considered. Allylpalladium chloride and methyl phenyldiazoacetate was used in the reaction to simplify the calculations.

The calculated free energy profiles for the two pathways are presented in Supplementary Figure 75.

Supplementary Figure 75(a) shows the calculated free energy profile for the process of bond cleavage of **B<sub>a</sub>** to form aniline and iminium, which initiates from the interactions of **B<sub>a</sub>** and phosphoric acid. In experiments, it was observed that the phosphoric acid as a catalyst effectively facilitates the reaction to move to products as it is mixed with reactants in solution. Thus, it is reasonable to take the phosphoric acid as a possible proton source for the protonation of **B<sub>a</sub>**. The complex **I<sub>a</sub>** is stabilized by the formation of hydrogen bonding interactions between **B<sub>a</sub>** and phosphoric acid, with releasing an energy of 6.1 kcal/mol. The C-N bond in **I<sub>a</sub>** subsequently cleaves to yield the intermediate **I<sub>b</sub>**, concomitant with the hydrogen transfer from the phosphoric acid to the nitrogen atom. The potential energy scan of the C-N distance indicates that no transition state exists for the cleavage of C-N bond, as shown in Supplementary Figure 76. The resulted complex **I<sub>b</sub>** is slightly endothermic by 8.1 kcal/mol and the calculated barrier for the C-N bond cleavage is 14.2 kcal/mol. The intermediate **I<sub>b</sub>** is further stabilized by transforming to complex **I<sub>c</sub>** with a exothermic energy of 2.1 kcal/mol. Then, the carbonic hydrogen is abstracted by the phosphate group to yield the **I<sub>d</sub>**, which dissociates and then undergoes subsequent transformations.

Supplementary Figure 75(b) shows the calculated free energy profile for the direct addition of the reactant **B<sub>a</sub>** to the carbenoid **D<sub>a</sub>**. In solution, the direct coupling between the sp<sup>2</sup>-hybrid carbon in **E<sub>a</sub>** and the amino nitrogen via the transition state **II<sub>a</sub>** has a modest energy barrier of 6.8 kcal/mol. The ylide product **E<sub>a</sub>** appears to be not quite favorable in thermodynamics, with a slight endothermic 0.8 kcal/mol. Then, the ylide **E<sub>a</sub>** rearranges to the enolate **F<sub>a</sub>**. In the next step, the C-N bond in **F<sub>a</sub>** breaks and a new C-C bond forms through the transition state **II<sub>b</sub>** to form a more stable intermediate **II<sub>c</sub>** with a release of energy 25.9 kcal/mol. Nevertheless, the calculated energy of transition state **II<sub>b</sub>** is higher than the reactants by 21.9 kcal/mol and the barrier for **F<sub>a</sub>** to surmount the transition state **II<sub>b</sub>** is highly up to 29.4 kcal/mol. Such a high energy barrier implies this reaction step is extremely slow and could be regarded as the rate-determining step of this pathway. The elimination of Pd complex from **II<sub>c</sub>** only needs an energy of 9.1 kcal/mol to yield the products **II<sub>d</sub>** and allylpalladium chloride **II<sub>e</sub>**. Supplementary Figure 775 shows that the calculated structure of product **II<sub>d</sub>** is in a good agreement with the crystal structure measured by X-ray.

The comparison of free energy profiles of these two pathways by DFT calculations indicates that the bond cleavage pathway in the Supplementary Figure 75(a) is more favorable than the pathway in Figure 75(b). The rate-determining step for the C-N bond cleavage is from **I<sub>a</sub>** to **I<sub>b</sub>** and the calculated barrier is merely 14.2 kcal/mol. According to the transition state theory, the calculated reaction time corresponding to this barrier is  $4.1 \times 10^{-3}$  s, which accords with the experimental observation of rapid reactions. Nevertheless, the pathway of direct addition of **B<sub>a</sub>** to **D<sub>a</sub>** in the Supplementary Figure 75(b) needs to surmount a high energy barrier of 29.4 kcal/mol and the theoretical reaction time of this elementary step is  $5.78 \times 10^8$  s. Thus, the reaction along the pathway in the Supplementary Figure 75(b) is extremely slow and difficult to compete with the direct bond cleavage of **B<sub>a</sub>**.

In addition, it should be noted that the nitrogen atom of imine in **I<sub>a</sub>** forms a hydrogen-bonding

interaction with the phosphoric acid. Such a stable complex prevents the direct addition of  $\mathbf{D}_a$  to the nitrogen atom of  $\mathbf{B}_a$  from yielding the ylide  $\mathbf{E}_a$ . Therefore, the DFT calculations support the priority of the intramolecular elimination of  $\mathbf{B}_a$  and exclude the direct addition of  $\mathbf{B}_a$  and  $\mathbf{D}_a$  as an alternative reaction pathway. The modest barrier of C-N cleavage of  $\mathbf{I}_a$  makes it easier to occur and follow the mechanism of the three-component reaction, which facilitates the subsequent processes involving the formation of ylide and the coupling of two active intermediate. These indicate the pathway we proposed in the three-component reaction is favorable and reasonable.

### Coordinates of the Optimized Structures

Coordinates of the optimized structure  $\mathbf{B}_a$ :

| Elements | X          | Y           | Z           |
|----------|------------|-------------|-------------|
| C        | 7.88089500 | 9.94426100  | -0.04873900 |
| C        | 7.18978600 | 8.59061500  | -0.17507800 |
| C        | 5.80692400 | 9.95856200  | -1.72922400 |
| C        | 5.66566800 | 10.82165000 | -0.48218800 |
| H        | 8.44575500 | 10.14011300 | -0.97222200 |
| H        | 7.94790000 | 7.81433400  | -0.29111600 |
| H        | 6.55733900 | 10.36162700 | -2.42903400 |
| H        | 4.92672600 | 10.37717400 | 0.20329400  |
| O        | 6.92111100 | 11.00223900 | 0.21654900  |
| H        | 5.31020300 | 11.81483200 | -0.76973300 |
| H        | 4.84758600 | 9.87402000  | -2.24754200 |
| H        | 6.58290700 | 8.38349900  | 0.71697000  |
| H        | 8.56645900 | 9.92850100  | 0.80142200  |
| N        | 6.29373400 | 8.60201900  | -1.36414000 |
| C        | 6.15297500 | 7.56504600  | -2.16601300 |
| C        | 5.23292700 | 7.62736400  | -3.33778400 |
| C        | 4.08253600 | 6.81302300  | -3.28149500 |
| C        | 5.47067400 | 8.41976400  | -4.47621100 |
| C        | 3.16709600 | 6.80863800  | -4.33869200 |
| H        | 3.89512900 | 6.19123700  | -2.40809800 |
| C        | 4.55908500 | 8.39283500  | -5.53878200 |
| H        | 6.39666500 | 8.99412800  | -4.52762200 |
| C        | 3.40675900 | 7.59636400  | -5.47388500 |
| H        | 2.28140700 | 6.18387000  | -4.28295900 |
| H        | 4.75876200 | 8.99095200  | -6.42245100 |
| H        | 2.70652900 | 7.58089800  | -6.30364600 |
| C        | 6.70474000 | 6.21234400  | -1.81175200 |
| H        | 6.06682400 | 5.47133800  | -2.30295600 |
| H        | 6.65465300 | 6.04250000  | -0.72854100 |
| C        | 8.18887900 | 5.89253000  | -2.31543400 |
| C        | 9.20600900 | 6.02853100  | -1.19860800 |

|    |             |            |             |
|----|-------------|------------|-------------|
| C  | 10.23654400 | 6.97859800 | -1.29034700 |
| C  | 9.12575600  | 5.20326200 | -0.05977700 |
| C  | 11.17047200 | 7.10301200 | -0.25105200 |
| H  | 10.26667900 | 7.63501200 | -2.15953300 |
| C  | 10.06211600 | 5.32564200 | 0.97501600  |
| H  | 8.32598300  | 4.46632700 | 0.02419300  |
| C  | 11.08651900 | 6.28075400 | 0.88225100  |
| H  | 11.96155900 | 7.84303300 | -0.32805400 |
| H  | 9.99456300  | 4.68405700 | 1.84900600  |
| H  | 11.81211700 | 6.38078800 | 1.68428300  |
| C  | 7.17917400  | 5.12204100 | -4.96565200 |
| C  | 6.64312400  | 4.70971900 | -6.19156800 |
| C  | 6.60418600  | 3.35428600 | -6.54618900 |
| C  | 7.12204300  | 2.40380400 | -5.65090600 |
| C  | 7.65700200  | 2.79920900 | -4.42311100 |
| C  | 7.69244100  | 4.16555500 | -4.06280200 |
| H  | 7.23277800  | 6.18414800 | -4.73798800 |
| H  | 6.26643500  | 5.46195500 | -6.87956600 |
| H  | 6.18961500  | 3.04400400 | -7.50017400 |
| H  | 7.10800300  | 1.34879300 | -5.91113500 |
| H  | 8.05340500  | 2.05618500 | -3.73261000 |
| N  | 8.23079300  | 4.53620800 | -2.83164800 |
| H  | 8.74750800  | 3.84377900 | -2.30377100 |
| H  | 8.43647400  | 6.62712800 | -3.09560100 |
| Cl | 8.57387800  | 9.06206500 | -3.49923100 |

Coordinates of the optimized structure **I<sub>a</sub>**:

| Elements | X          | Y           | Z           |
|----------|------------|-------------|-------------|
| C        | 7.13579000 | 9.68269300  | 0.69944200  |
| C        | 7.37398400 | 8.48334000  | -0.20968600 |
| C        | 5.83964100 | 9.87958000  | -1.58453000 |
| C        | 5.00772700 | 10.24225100 | -0.35458400 |
| H        | 7.58651400 | 10.59296200 | 0.28924600  |
| H        | 8.39712300 | 8.52911400  | -0.60862600 |
| H        | 6.67799600 | 10.56098500 | -1.79642900 |
| H        | 4.06557700 | 9.68261700  | -0.34664400 |
| O        | 5.70090100 | 9.87678700  | 0.88445700  |
| H        | 4.80413700 | 11.31779200 | -0.34272400 |
| H        | 5.19503900 | 9.85936400  | -2.46371300 |
| H        | 7.20943300 | 7.54153800  | 0.32750200  |
| H        | 7.55147200 | 9.49811300  | 1.69155900  |
| N        | 6.45062800 | 8.54528100  | -1.37840400 |
| C        | 6.25585800 | 7.53568700  | -2.18840700 |
| C        | 5.50733200 | 7.72300800  | -3.44967000 |



|   |             |            |             |
|---|-------------|------------|-------------|
| C | 4.29015200  | 7.04439000 | -3.64300000 |
| C | 6.07298600  | 8.51249700 | -4.46827200 |
| C | 3.61869000  | 7.18111700 | -4.86144700 |
| H | 3.87514300  | 6.45019600 | -2.83219900 |
| C | 5.40566700  | 8.60898200 | -5.69604000 |
| H | 7.03675600  | 9.00236000 | -4.31315800 |
| C | 4.17929700  | 7.95768900 | -5.89025700 |
| H | 2.66769900  | 6.67976400 | -5.01325900 |
| H | 5.85866800  | 9.18554400 | -6.49572600 |
| H | 3.66318100  | 8.04692300 | -6.84216600 |
| C | 6.83138900  | 6.17144000 | -1.94571000 |
| H | 6.17090700  | 5.46383200 | -2.46044100 |
| H | 6.83523500  | 5.91126900 | -0.88224700 |
| C | 8.27023600  | 6.06061600 | -2.55663300 |
| C | 9.35148400  | 6.23000300 | -1.50373700 |
| C | 10.36841100 | 7.17847800 | -1.67196500 |
| C | 9.35175200  | 5.41090900 | -0.35789700 |
| C | 11.36734100 | 7.31936800 | -0.69830300 |
| H | 10.33392600 | 7.84930300 | -2.52651700 |
| C | 10.35421600 | 5.54376300 | 0.61027000  |
| H | 8.56047000  | 4.67246800 | -0.21194300 |
| C | 11.36488400 | 6.50456500 | 0.44163400  |
| H | 12.13883100 | 8.07137500 | -0.83217100 |
| H | 10.35223000 | 4.90508300 | 1.48975500  |
| H | 12.14173400 | 6.61467600 | 1.19296300  |
| C | 6.84402500  | 4.87974500 | -5.02454100 |
| C | 5.94737100  | 4.23127600 | -5.88294900 |
| C | 5.75662500  | 2.84413800 | -5.81569700 |
| C | 6.47667500  | 2.09632100 | -4.87223500 |
| C | 7.36576500  | 2.73364400 | -4.00016900 |
| C | 7.55218600  | 4.12575500 | -4.07262000 |
| H | 7.01138400  | 5.95143200 | -5.12043300 |
| H | 5.40386600  | 4.82278900 | -6.61478200 |
| H | 5.06320800  | 2.35161700 | -6.49042900 |
| H | 6.34400000  | 1.02002000 | -4.81192700 |
| H | 7.92212400  | 2.15318300 | -3.26549500 |
| N | 8.51801900  | 4.73474700 | -3.20644000 |
| H | 8.90626500  | 4.06597500 | -2.53876500 |
| H | 8.38976900  | 6.83772400 | -3.32980000 |
| H | 9.77704700  | 5.22088900 | -4.17014800 |
| P | 9.96258000  | 6.80244900 | -5.87401700 |
| O | 10.09721500 | 5.96236200 | -7.31996300 |
| O | 10.47011600 | 5.70220000 | -4.75183300 |
| O | 8.54864300  | 7.45481300 | -5.58572700 |

|    |             |             |             |
|----|-------------|-------------|-------------|
| O  | 11.21972900 | 7.89675200  | -6.03762500 |
| C  | 11.42562700 | 8.91358400  | -5.00205900 |
| H  | 12.04542000 | 8.48506900  | -4.20684000 |
| H  | 11.95700600 | 9.72960100  | -5.49108800 |
| H  | 10.47286400 | 9.27630500  | -4.58582900 |
| C  | 9.84205300  | 6.66406600  | -8.56730200 |
| H  | 10.60741000 | 7.42913900  | -8.73361300 |
| H  | 9.89469200  | 5.90291100  | -9.34524500 |
| H  | 8.84622600  | 7.12317900  | -8.55675500 |
| P  | 4.42902000  | 6.60791800  | 1.06810800  |
| O  | 4.09635200  | 6.92224400  | -0.43626900 |
| O  | 5.86110300  | 5.74384300  | 1.23616500  |
| O  | 4.56520000  | 7.92342700  | 2.07691600  |
| O  | 3.36917100  | 5.63072600  | 1.91914400  |
| H  | 4.98561400  | 8.77835400  | 1.70422900  |
| C  | 1.99265000  | 6.06473700  | 2.12448000  |
| H  | 1.50400800  | 6.24534300  | 1.16065300  |
| H  | 1.50184600  | 5.24244100  | 2.64282100  |
| H  | 1.97212900  | 6.96955000  | 2.74015000  |
| C  | 6.27880400  | 5.27390400  | 2.55550900  |
| H  | 6.29872400  | 6.10636600  | 3.26745800  |
| H  | 5.59259800  | 4.49818600  | 2.90423100  |
| H  | 7.28224500  | 4.87040900  | 2.41735700  |
| Cl | 8.93208800  | 10.06808500 | -2.64572000 |

Coordinates of the optimized structure **I<sub>b</sub>**:

| Elements | X          | Y           | Z           |
|----------|------------|-------------|-------------|
| C        | 5.45008400 | 9.78026400  | 0.97928900  |
| C        | 6.39478300 | 8.99162500  | 0.06836500  |
| C        | 4.88470300 | 10.04850500 | -1.57407500 |
| C        | 3.66492000 | 9.82791600  | -0.67219800 |
| H        | 5.58615600 | 10.86581700 | 0.90198600  |
| H        | 7.40783600 | 9.41481200  | 0.08120500  |
| H        | 5.36976700 | 11.00859700 | -1.35925900 |
| H        | 3.04846000 | 9.00731100  | -1.04875900 |
| O        | 4.07480500 | 9.43036800  | 0.67583200  |
| H        | 3.07398100 | 10.74842600 | -0.60740900 |
| H        | 4.58525300 | 10.05727800 | -2.62173800 |
| H        | 6.44202000 | 7.95458100  | 0.41910200  |
| H        | 5.61938500 | 9.49079100  | 2.01865900  |
| N        | 5.88755000 | 8.99204400  | -1.33492600 |
| C        | 6.33001500 | 8.15077000  | -2.25905000 |
| C        | 5.76904000 | 8.11637600  | -3.61748900 |
| C        | 4.37406100 | 8.01757500  | -3.83469700 |

|   |             |            |             |
|---|-------------|------------|-------------|
| C | 6.64668100  | 8.09284600 | -4.72031600 |
| C | 3.87973400  | 7.93277900 | -5.13668000 |
| H | 3.70808800  | 7.90748600 | -2.98314100 |
| C | 6.14355300  | 8.03454800 | -6.02614000 |
| H | 7.72680700  | 8.11760300 | -4.60085700 |
| C | 4.76041800  | 7.95413400 | -6.23320800 |
| H | 2.81090600  | 7.82646200 | -5.29768600 |
| H | 6.87211000  | 8.03067500 | -6.83634900 |
| H | 4.36822400  | 7.88796400 | -7.24391900 |
| C | 7.41817900  | 7.17606000 | -1.91208000 |
| H | 7.23720100  | 6.26574200 | -2.50322300 |
| H | 7.32791700  | 6.87184700 | -0.86655200 |
| C | 8.85681000  | 7.60270100 | -2.24386900 |
| C | 9.91418700  | 6.90683200 | -1.44809900 |
| C | 11.08099300 | 6.50211500 | -2.12187300 |
| C | 9.79342400  | 6.67380000 | -0.06635200 |
| C | 12.10776600 | 5.85896200 | -1.41912800 |
| H | 11.15126800 | 6.67384600 | -3.19674400 |
| C | 10.81918500 | 6.02940100 | 0.63410200  |
| H | 8.90539400  | 7.00895500 | 0.47124800  |
| C | 11.97825200 | 5.61824700 | -0.04282000 |
| H | 13.00489300 | 5.54654600 | -1.94472900 |
| H | 10.72525500 | 5.85528700 | 1.70263800  |
| H | 12.77605100 | 5.11908100 | 0.49975000  |
| C | 6.87454200  | 4.58957800 | -4.07396900 |
| C | 5.52403700  | 4.51412700 | -3.72644100 |
| C | 5.11537900  | 3.88522000 | -2.53620100 |
| C | 6.09148800  | 3.31434600 | -1.70376400 |
| C | 7.45114100  | 3.38820400 | -2.03098200 |
| C | 7.86804800  | 4.04185900 | -3.21840300 |
| H | 7.19423900  | 5.08867100 | -4.98716400 |
| H | 4.78372600  | 4.95649800 | -4.39031700 |
| H | 4.06161900  | 3.82626700 | -2.27715400 |
| H | 5.78454400  | 2.80689300 | -0.79018400 |
| H | 8.20436500  | 2.95584400 | -1.37297300 |
| N | 9.19674100  | 4.18524600 | -3.54284400 |
| H | 9.90423000  | 3.83885400 | -2.91014200 |
| H | 9.07293800  | 7.49527300 | -3.31489100 |
| H | 9.46552300  | 4.90760800 | -4.22682700 |
| P | 9.98174800  | 7.18506700 | -6.32140300 |
| O | 10.74624400 | 5.94893000 | -7.19461100 |
| O | 9.53577800  | 6.55770300 | -4.91737900 |
| O | 8.91862800  | 7.99202500 | -7.18858100 |
| O | 11.36590200 | 8.17551500 | -6.04316300 |

|    |             |             |             |
|----|-------------|-------------|-------------|
| C  | 11.11776900 | 9.51208200  | -5.55207600 |
| H  | 10.61923000 | 9.48676100  | -4.56925400 |
| H  | 12.09352100 | 9.98934400  | -5.44490700 |
| H  | 10.49529500 | 10.07708100 | -6.25678600 |
| C  | 11.20741000 | 6.25259500  | -8.53311200 |
| H  | 11.99751800 | 7.01236700  | -8.50197600 |
| H  | 11.60320100 | 5.31845600  | -8.93452500 |
| H  | 10.37980900 | 6.61128900  | -9.15683100 |
| P  | 4.27774000  | 6.03567900  | 0.24977700  |
| O  | 4.02918600  | 6.71533600  | -1.14362600 |
| O  | 5.89521200  | 5.81710400  | 0.61162900  |
| O  | 3.65442900  | 6.94059700  | 1.51893300  |
| O  | 3.65063500  | 4.52090400  | 0.55615200  |
| H  | 3.63168100  | 7.92853200  | 1.33933700  |
| C  | 2.22710100  | 4.27085300  | 0.36297400  |
| H  | 1.93440400  | 4.51614100  | -0.66424800 |
| H  | 2.09180000  | 3.20614100  | 0.54564600  |
| H  | 1.64359600  | 4.85800300  | 1.07928100  |
| C  | 6.36151000  | 4.87666000  | 1.62747300  |
| H  | 6.15014100  | 5.27709100  | 2.62455600  |
| H  | 5.87362400  | 3.90774000  | 1.49739100  |
| H  | 7.43572300  | 4.78526900  | 1.45926100  |
| Cl | 9.06239100  | 9.51821100  | -1.96526200 |

Coordinates of the optimized structure **I<sub>c</sub>**:

| Elements | X          | Y           | Z           |
|----------|------------|-------------|-------------|
| C        | 6.71640700 | 10.33341500 | -0.85165700 |
| C        | 7.19011600 | 8.89809000  | -1.02417100 |
| C        | 5.47094400 | 9.09815700  | -2.82237500 |
| C        | 4.56172400 | 9.90875400  | -1.89599500 |
| H        | 7.00029400 | 10.95732600 | -1.70654300 |
| H        | 8.21461000 | 8.90061700  | -1.43339600 |
| H        | 6.15070100 | 9.71169300  | -3.43143200 |
| H        | 3.71942500 | 9.29893800  | -1.55408900 |
| O        | 5.26640400 | 10.33570500 | -0.68517900 |
| H        | 4.18949700 | 10.79502700 | -2.42023200 |
| H        | 4.85058400 | 8.50456100  | -3.49571200 |
| H        | 7.13203500 | 8.36144100  | -0.06950800 |
| H        | 7.13223200 | 10.76838700 | 0.05846300  |
| N        | 6.33585900 | 8.20136500  | -2.02908700 |
| C        | 6.46006100 | 6.91835000  | -2.27234200 |
| C        | 5.79955100 | 6.27145500  | -3.41846400 |
| C        | 4.96285500 | 5.15949400  | -3.20791100 |

|   |             |             |             |
|---|-------------|-------------|-------------|
| C | 6.10289900  | 6.70916700  | -4.72477900 |
| C | 4.39996700  | 4.50373900  | -4.30683200 |
| H | 4.73962500  | 4.82732700  | -2.19706000 |
| C | 5.55117000  | 6.02849000  | -5.81460600 |
| H | 6.82146100  | 7.52363500  | -4.85645400 |
| C | 4.70002100  | 4.93152800  | -5.60881900 |
| H | 3.75401700  | 3.64612800  | -4.14938200 |
| H | 5.79779900  | 6.34630500  | -6.82379200 |
| H | 4.28170400  | 4.39458100  | -6.45548500 |
| C | 7.37248800  | 6.06868700  | -1.44142400 |
| H | 6.96643100  | 5.04970000  | -1.40683700 |
| H | 7.45764500  | 6.43178900  | -0.41249900 |
| C | 8.77313800  | 6.04937400  | -2.08971100 |
| C | 9.85504200  | 5.44448900  | -1.22957300 |
| C | 11.18704100 | 5.71643800  | -1.59467400 |
| C | 9.59640800  | 4.63507200  | -0.11085100 |
| C | 12.24776900 | 5.19217000  | -0.84872300 |
| H | 11.37210100 | 6.34142700  | -2.46576500 |
| C | 10.65970200 | 4.11116800  | 0.63913800  |
| H | 8.57370700  | 4.40599100  | 0.17914300  |
| C | 11.98467000 | 4.38984700  | 0.27440800  |
| H | 13.27232400 | 5.41249500  | -1.13230500 |
| H | 10.45411500 | 3.48692800  | 1.50372800  |
| H | 12.80601700 | 3.98792700  | 0.86045700  |
| C | 5.40535200  | 1.40139700  | -5.19439000 |
| C | 4.95292100  | 0.96795300  | -6.44391300 |
| C | 3.80773700  | 0.16230300  | -6.56518000 |
| C | 3.11630000  | -0.20533600 | -5.40038700 |
| C | 3.55525000  | 0.21932700  | -4.14128000 |
| C | 4.70839700  | 1.02977600  | -4.01877400 |
| H | 6.28681800  | 2.03758100  | -5.12010300 |
| H | 5.50435400  | 1.26148700  | -7.33448000 |
| H | 3.46549100  | -0.17193600 | -7.53998200 |
| H | 2.22849300  | -0.82920100 | -5.47135400 |
| H | 3.01182700  | -0.07247800 | -3.24350500 |
| N | 5.14136300  | 1.47388000  | -2.78073800 |
| H | 4.68201900  | 1.14751200  | -1.94419700 |
| H | 9.05686400  | 7.06660600  | -2.41744200 |
| P | 8.51871200  | 3.71952700  | -3.59753000 |
| O | 7.96316200  | 3.67601000  | -5.16254400 |
| O | 7.62150200  | 2.95452400  | -2.55797400 |
| O | 8.69614500  | 5.37427400  | -3.39601300 |
| O | 10.08322200 | 3.11955600  | -3.74132100 |
| C | 10.66363100 | 2.21516700  | -2.75767700 |

|    |             |            |             |
|----|-------------|------------|-------------|
| H  | 9.87805000  | 1.69417200 | -2.19869200 |
| H  | 11.26575500 | 1.50068700 | -3.31994200 |
| H  | 11.29446800 | 2.79065500 | -2.07247200 |
| C  | 8.63083600  | 4.43561100 | -6.22065300 |
| H  | 9.64119600  | 4.04437600 | -6.37559200 |
| H  | 8.01644700  | 4.27853700 | -7.10721300 |
| H  | 8.66507000  | 5.49804200 | -5.95650000 |
| P  | 4.61705100  | 7.30451700 | 1.06547500  |
| O  | 4.28503800  | 6.83509800 | -0.39683000 |
| O  | 6.15937400  | 6.84564200 | 1.54925300  |
| O  | 4.52059300  | 8.94333600 | 1.34835100  |
| O  | 3.69662200  | 6.69054700 | 2.32196900  |
| H  | 4.76984100  | 9.59109500 | 0.60119700  |
| C  | 2.27000700  | 6.98468000 | 2.38195200  |
| H  | 1.76772000  | 6.61192000 | 1.48268400  |
| H  | 1.90097500  | 6.45857100 | 3.26099400  |
| H  | 2.11429800  | 8.06290500 | 2.48963200  |
| C  | 6.59072500  | 7.04218600 | 2.93196000  |
| H  | 6.48730400  | 8.09483200 | 3.21781300  |
| H  | 5.99463900  | 6.41321400 | 3.59767700  |
| H  | 7.63844400  | 6.74243300 | 2.95431300  |
| H  | 6.01691700  | 1.99078000 | -2.68713600 |
| Cl | 8.73350000  | 9.03176200 | -3.81838800 |

Coordinates of the optimized structure **I<sub>d</sub>**:

| Elements | X          | Y           | Z           |
|----------|------------|-------------|-------------|
| C        | 5.15871400 | 9.75950400  | 0.16346700  |
| C        | 6.40474600 | 9.01389800  | -0.30207900 |
| C        | 5.02718900 | 8.95818000  | -2.35802200 |
| C        | 3.72563200 | 8.83604100  | -1.55425500 |
| H        | 5.04317200 | 10.72708600 | -0.33882900 |
| H        | 7.23654500 | 9.72685300  | -0.42438900 |
| H        | 5.30262800 | 10.00186800 | -2.57863600 |
| H        | 3.26568300 | 7.85416300  | -1.69905900 |
| O        | 3.99042500 | 8.93497900  | -0.10837400 |
| H        | 3.02854300 | 9.63451400  | -1.82990100 |
| H        | 4.90873500 | 8.44830000  | -3.31509600 |
| H        | 6.66958800 | 8.23846400  | 0.42686300  |
| H        | 5.18457900 | 9.92586200  | 1.24191300  |
| N        | 6.15983200 | 8.36972400  | -1.61531600 |
| C        | 7.22903800 | 7.87252900  | -2.28720000 |
| C        | 7.03043100 | 7.24551500  | -3.62660000 |
| C        | 6.10727900 | 6.18795500  | -3.76251900 |

|   |             |            |             |
|---|-------------|------------|-------------|
| C | 7.81172200  | 7.63594900 | -4.72647600 |
| C | 5.96349000  | 5.53405400 | -4.99242200 |
| H | 5.46593400  | 5.89724100 | -2.93273400 |
| C | 7.65306300  | 6.98741800 | -5.95678700 |
| H | 8.49924600  | 8.46901000 | -4.59977500 |
| C | 6.73223700  | 5.93767900 | -6.09369800 |
| H | 5.24369800  | 4.72138800 | -5.07693400 |
| H | 8.24843700  | 7.30343000 | -6.80789700 |
| H | 6.60610900  | 5.44622000 | -7.05545600 |
| C | 8.45223200  | 7.56535100 | -1.56295000 |
| H | 7.00179300  | 4.27557700 | -1.70266000 |
| H | 8.62733300  | 8.09739500 | -0.63336400 |
| C | 9.37419200  | 6.66934400 | -2.00610500 |
| C | 10.60704700 | 6.31248700 | -1.30486100 |
| C | 11.44240200 | 5.33422800 | -1.88912300 |
| C | 11.00136200 | 6.89053500 | -0.07622900 |
| C | 12.63016200 | 4.94220100 | -1.26197300 |
| H | 11.13937100 | 4.89984600 | -2.84120300 |
| C | 12.18654000 | 6.49656300 | 0.54848400  |
| H | 10.39080600 | 7.66261300 | 0.38548400  |
| C | 13.00616100 | 5.51825800 | -0.04006100 |
| H | 13.26688300 | 4.19512200 | -1.72816000 |
| H | 12.48131000 | 6.95380800 | 1.48850800  |
| H | 13.92945700 | 5.21743500 | 0.44625000  |
| C | 4.08821200  | 1.70431900 | -4.40350700 |
| C | 3.22852100  | 1.71439100 | -5.50696900 |
| C | 2.08849100  | 2.53431800 | -5.52347300 |
| C | 1.82444900  | 3.34643500 | -4.40880000 |
| C | 2.68000400  | 3.35441200 | -3.30212200 |
| C | 3.82927700  | 2.53206100 | -3.28652700 |
| H | 4.95469700  | 1.04696500 | -4.37618000 |
| H | 3.44059300  | 1.06534900 | -6.35404400 |
| H | 1.42198200  | 2.53743600 | -6.38051400 |
| H | 0.94979900  | 3.99223700 | -4.40713700 |
| H | 2.50212700  | 4.02933000 | -2.46770800 |
| N | 4.69149600  | 2.52490800 | -2.19881300 |
| H | 4.43236500  | 2.93043400 | -1.30920200 |
| H | 9.20913100  | 6.14518200 | -2.94973400 |
| P | 8.33605800  | 3.16965700 | -3.33597400 |
| O | 7.06667600  | 2.58686300 | -4.25530400 |
| O | 7.63540500  | 3.52882900 | -1.87953600 |
| O | 9.26570500  | 4.25167500 | -3.99978200 |
| O | 9.11601000  | 1.72934100 | -2.94971700 |
| C | 10.36765400 | 1.77386000 | -2.21160700 |

|    |             |             |             |
|----|-------------|-------------|-------------|
| H  | 10.23689400 | 2.30154800  | -1.25905100 |
| H  | 10.63700400 | 0.73432500  | -2.02791800 |
| H  | 11.14658100 | 2.26620000  | -2.80546600 |
| C  | 7.27637500  | 2.36639200  | -5.68372500 |
| H  | 7.90429900  | 1.48181000  | -5.83262700 |
| H  | 6.27954800  | 2.20840600  | -6.09874500 |
| H  | 7.74023300  | 3.24887400  | -6.13923100 |
| P  | 4.62789700  | 5.50348400  | -0.21029400 |
| O  | 3.79880900  | 5.75277000  | -1.51641300 |
| O  | 6.27144600  | 5.27191000  | -0.48223400 |
| O  | 4.48753700  | 6.67112100  | 0.95606900  |
| O  | 4.29144800  | 4.07740600  | 0.61148400  |
| H  | 4.18467300  | 7.59694200  | 0.62186900  |
| C  | 2.96975400  | 3.88606800  | 1.20482700  |
| H  | 2.19432400  | 3.95674600  | 0.43262100  |
| H  | 2.98328900  | 2.88371700  | 1.62918400  |
| H  | 2.80065000  | 4.63188000  | 1.98732600  |
| C  | 7.18283100  | 5.05176300  | 0.65293500  |
| H  | 7.00525200  | 5.80872900  | 1.42296200  |
| H  | 7.02253500  | 4.04676400  | 1.05050100  |
| H  | 8.18664200  | 5.14749700  | 0.23459800  |
| H  | 5.60463900  | 2.09944300  | -2.28362700 |
| Cl | 8.10993500  | 10.30031900 | -2.82147600 |

Coordinates of the optimized structure  $\mathbf{D}_a$ :

| Elements | X           | Y          | Z           |
|----------|-------------|------------|-------------|
| C        | -1.13041400 | 5.91079500 | 2.52467300  |
| C        | -1.78181100 | 5.13431400 | 1.57157500  |
| C        | -2.06857700 | 3.76275800 | 1.83269400  |
| C        | -1.70101500 | 3.20840600 | 3.08982500  |
| C        | -1.06079500 | 3.99678800 | 4.04529100  |
| C        | -0.77049400 | 5.34135300 | 3.76112700  |
| H        | -0.90201100 | 6.95178100 | 2.32122500  |
| H        | -2.06164800 | 5.56882900 | 0.61442000  |
| H        | -1.96839500 | 2.17361100 | 3.29518100  |
| H        | -0.79447500 | 3.57486600 | 5.00825500  |
| H        | -0.26796100 | 5.95193800 | 4.50576400  |
| C        | -2.72889700 | 2.93280300 | 0.86676300  |
| C        | -3.24550000 | 3.56427500 | -0.37018500 |
| O        | -2.66008000 | 3.55286200 | -1.46549800 |
| O        | -4.46561800 | 4.13395000 | -0.16159900 |
| C        | -5.16796500 | 4.65242600 | -1.33304100 |
| H        | -6.12298300 | 5.01147500 | -0.95443700 |



|    |             |             |             |
|----|-------------|-------------|-------------|
| H  | -4.59515400 | 5.46400500  | -1.79063100 |
| H  | -5.31168200 | 3.85423900  | -2.06662300 |
| C  | -2.54008100 | -0.68749100 | -0.50415400 |
| Pd | -2.94096100 | 0.96820500  | 0.95698600  |
| C  | -2.66555900 | -1.31069700 | 0.74583700  |
| C  | -1.60257700 | 0.38739800  | -0.66176200 |
| H  | -1.62565200 | 1.00347600  | -1.55560000 |
| H  | -0.64583800 | 0.34259700  | -0.14058500 |
| H  | -3.32657800 | -0.81559600 | -1.24439000 |
| H  | -3.51193600 | -1.94899500 | 0.97195900  |
| H  | -1.82862000 | -1.34825300 | 1.44215800  |
| Cl | -4.30868100 | 0.75454800  | 2.95089900  |

Coordinates of the optimized structure **II<sub>a</sub>**:

| Elements | X          | Y           | Z           |
|----------|------------|-------------|-------------|
| C        | 7.88236300 | 7.84296500  | 1.64202200  |
| C        | 7.22443200 | 6.80719700  | 0.74149000  |
| C        | 5.49478800 | 8.61733200  | 0.72109300  |
| C        | 5.60693800 | 8.41939800  | 2.23127600  |
| H        | 8.27138100 | 8.67850900  | 1.04062700  |
| H        | 7.95602400 | 6.43712700  | 0.01567300  |
| H        | 6.06680400 | 9.50038700  | 0.41509800  |
| H        | 5.06168900 | 7.51212500  | 2.53155600  |
| O        | 6.98332800 | 8.33618900  | 2.66283400  |
| H        | 5.16031300 | 9.27350600  | 2.74581600  |
| H        | 4.45182800 | 8.75674500  | 0.42804000  |
| H        | 6.87779700 | 5.94632900  | 1.32859700  |
| H        | 8.72349900 | 7.37935500  | 2.16027100  |
| N        | 6.04363800 | 7.40966600  | 0.03026600  |
| C        | 5.48787300 | 6.84990500  | -1.03079400 |
| C        | 4.39788000 | 7.50158600  | -1.77425800 |
| C        | 3.31096600 | 6.72890000  | -2.23486000 |
| C        | 4.47974000 | 8.86482900  | -2.13211900 |
| C        | 2.30444800 | 7.32178100  | -3.00235200 |
| H        | 3.23569100 | 5.67482900  | -1.97594500 |
| C        | 3.48304800 | 9.44695100  | -2.91695800 |
| H        | 5.35438800 | 9.45112200  | -1.85963500 |
| C        | 2.38822000 | 8.67999000  | -3.34516800 |
| H        | 1.45955700 | 6.72860400  | -3.33502400 |
| H        | 3.56425600 | 10.48942700 | -3.20522300 |
| H        | 1.60999800 | 9.13536400  | -3.94880900 |
| C        | 5.92378000 | 5.48873400  | -1.47498500 |
| H        | 5.07480100 | 4.81456000  | -1.28872200 |
| H        | 6.74347000 | 5.10732600  | -0.85935800 |

|    |             |             |             |
|----|-------------|-------------|-------------|
| C  | 6.33235200  | 5.38656700  | -2.97480100 |
| C  | 6.95806000  | 6.68796000  | -3.45664800 |
| C  | 6.32716900  | 7.46568700  | -4.43647200 |
| C  | 8.17480100  | 7.12639600  | -2.90162700 |
| C  | 6.88690300  | 8.68403900  | -4.84377600 |
| H  | 5.39438000  | 7.11772200  | -4.88038200 |
| C  | 8.73371800  | 8.34522800  | -3.30419200 |
| H  | 8.71022100  | 6.49723700  | -2.18652200 |
| C  | 8.08688000  | 9.13087800  | -4.27193400 |
| H  | 6.39491800  | 9.27678700  | -5.60890800 |
| H  | 9.68049000  | 8.67159600  | -2.88491800 |
| H  | 8.52662200  | 10.06981900 | -4.59329100 |
| C  | 4.79466700  | 2.63316300  | 0.87661500  |
| C  | 5.82845300  | 2.48953200  | -0.05147500 |
| C  | 5.56958500  | 2.43286000  | -1.44578200 |
| C  | 4.21512200  | 2.50404900  | -1.86982000 |
| C  | 3.18051200  | 2.64564200  | -0.93823200 |
| C  | 3.46340100  | 2.71646800  | 0.43584000  |
| H  | 5.02107100  | 2.65956900  | 1.93779900  |
| H  | 6.86025700  | 2.42244600  | 0.28843100  |
| H  | 3.98492300  | 2.45246400  | -2.92855000 |
| H  | 2.15041800  | 2.67789400  | -1.28051800 |
| H  | 2.65515100  | 2.81178300  | 1.15476800  |
| C  | 6.72643700  | 2.26083700  | -2.35638100 |
| C  | 6.37161200  | 1.88390100  | -3.77886000 |
| O  | 5.44350900  | 2.36209400  | -4.45710600 |
| O  | 7.21991100  | 0.95518200  | -4.28668600 |
| C  | 7.00218600  | 0.55306400  | -5.67729600 |
| H  | 7.75358600  | -0.20998500 | -5.87285900 |
| H  | 5.99163700  | 0.15523500  | -5.80312500 |
| H  | 7.13916500  | 1.41852000  | -6.33266600 |
| C  | 9.45531900  | -0.15945300 | -0.82054500 |
| Pd | 8.54733000  | 1.78384100  | -1.46432300 |
| C  | 10.48771400 | 0.78881900  | -0.76749600 |
| C  | 8.70307100  | -0.28724200 | -2.03454800 |
| H  | 7.79556100  | -0.88270900 | -2.05225000 |
| H  | 9.19723000  | -0.16471400 | -2.99793000 |
| H  | 9.05791100  | -0.57403500 | 0.10271300  |
| H  | 10.92564100 | 1.08694600  | 0.17898000  |
| H  | 11.03906600 | 1.06333100  | -1.66683600 |
| Cl | 9.11291900  | 4.06707100  | -0.46915300 |
| C  | 7.36761100  | 4.32756300  | -5.56880500 |
| C  | 8.08550100  | 4.14890600  | -6.75676000 |
| C  | 9.42624200  | 3.73793800  | -6.72344000 |

|   |             |            |             |
|---|-------------|------------|-------------|
| C | 10.05298700 | 3.51600100 | -5.48759400 |
| C | 9.34796500  | 3.70629300 | -4.29478400 |
| C | 8.00076900  | 4.10743000 | -4.33464500 |
| H | 6.32250500  | 4.61717700 | -5.60991700 |
| H | 7.59590900  | 4.33008200 | -7.70856400 |
| H | 9.97833600  | 3.60180500 | -7.64779100 |
| H | 11.09367400 | 3.20999400 | -5.45205100 |
| H | 9.83991900  | 3.56123900 | -3.33353000 |
| N | 7.29996600  | 4.25435100 | -3.08607400 |
| H | 7.97172200  | 4.27791900 | -2.29888100 |
| H | 5.44855100  | 5.14693500 | -3.58233100 |

Coordinates of the optimized structure  $E_a$ :

| Elements | X          | Y           | Z           |
|----------|------------|-------------|-------------|
| C        | 8.01904300 | 8.15804400  | 1.33690000  |
| C        | 7.28787700 | 6.99697800  | 0.67692700  |
| C        | 5.53212100 | 8.77634300  | 0.53878800  |
| C        | 5.79582000 | 8.79914500  | 2.04183400  |
| H        | 8.34833700 | 8.87664200  | 0.57004000  |
| H        | 7.96090400 | 6.50311600  | -0.02886600 |
| H        | 6.03756900 | 9.62355300  | 0.06114000  |
| H        | 5.32363000 | 7.92951300  | 2.52250400  |
| O        | 7.21047700 | 8.82691800  | 2.33290800  |
| H        | 5.36536500 | 9.70483800  | 2.47474700  |
| H        | 4.46186600 | 8.84459100  | 0.32939200  |
| H        | 6.97938500 | 6.25170900  | 1.42051000  |
| H        | 8.90448200 | 7.77870100  | 1.85009400  |
| N        | 6.06355200 | 7.50065600  | -0.03650300 |
| C        | 5.47130700 | 6.83305100  | -1.01122800 |
| C        | 4.32552700 | 7.38253000  | -1.75444000 |
| C        | 3.23961600 | 6.53867200  | -2.07120600 |
| C        | 4.33707800 | 8.70837200  | -2.24039700 |
| C        | 2.16733500 | 7.02738000  | -2.82323100 |
| H        | 3.21326800 | 5.51205800  | -1.71082300 |
| C        | 3.27471000 | 9.18368500  | -3.01091100 |
| H        | 5.20389300 | 9.34408600  | -2.07379600 |
| C        | 2.18277000 | 8.34831400  | -3.29523800 |
| H        | 1.32456500 | 6.38151900  | -3.04425500 |
| H        | 3.30033400 | 10.19701000 | -3.39691500 |
| H        | 1.35361100 | 8.72197500  | -3.88697000 |
| C        | 5.91401800 | 5.44389000  | -1.35381900 |
| H        | 5.06789700 | 4.77910900  | -1.13302600 |
| H        | 6.72605000 | 5.10446900  | -0.70200100 |
| C        | 6.33490300 | 5.27011500  | -2.84934400 |

|    |             |             |             |
|----|-------------|-------------|-------------|
| C  | 6.95639400  | 6.55193400  | -3.36631900 |
| C  | 6.32143200  | 7.27638300  | -4.38425400 |
| C  | 8.15482600  | 7.04180900  | -2.81447800 |
| C  | 6.86632600  | 8.48250500  | -4.84415900 |
| H  | 5.39974700  | 6.89226800  | -4.82065900 |
| C  | 8.70213200  | 8.24554200  | -3.27244400 |
| H  | 8.69742600  | 6.45751900  | -2.06778400 |
| C  | 8.05671800  | 8.97135400  | -4.28694900 |
| H  | 6.37180100  | 9.03061100  | -5.64000800 |
| H  | 9.63998600  | 8.60475500  | -2.86023300 |
| H  | 8.48818900  | 9.89820000  | -4.65139400 |
| C  | 4.79879800  | 2.22640500  | 0.61909700  |
| C  | 5.87520000  | 2.29296700  | -0.27521100 |
| C  | 5.66897300  | 2.52722100  | -1.64854600 |
| C  | 4.33268300  | 2.64917500  | -2.10029000 |
| C  | 3.25311800  | 2.57585800  | -1.21063400 |
| C  | 3.48221400  | 2.37474800  | 0.15887700  |
| H  | 4.98927200  | 2.03815200  | 1.67117300  |
| H  | 6.88894700  | 2.16440500  | 0.09548200  |
| H  | 4.12698500  | 2.79756200  | -3.16019300 |
| H  | 2.23675600  | 2.65067400  | -1.58753100 |
| H  | 2.64814200  | 2.30577600  | 0.85034700  |
| C  | 6.83493800  | 2.60523700  | -2.64220900 |
| C  | 6.30621900  | 2.06089100  | -3.93210000 |
| O  | 5.87126900  | 2.73128500  | -4.88961100 |
| O  | 6.19369500  | 0.70272300  | -3.91043600 |
| C  | 5.43294400  | 0.09655900  | -4.99962400 |
| H  | 5.43828700  | -0.97221700 | -4.79177400 |
| H  | 4.40984400  | 0.48655200  | -5.00489000 |
| H  | 5.90457600  | 0.31389500  | -5.96107800 |
| C  | 9.49106000  | -0.27963500 | -1.45557000 |
| Pd | 8.61914500  | 1.74036600  | -1.69465800 |
| C  | 10.49379500 | 0.62836600  | -1.07048900 |
| C  | 8.87723900  | -0.11565500 | -2.74029000 |
| H  | 7.96649100  | -0.65137100 | -2.98254700 |
| H  | 9.47881600  | 0.20933400  | -3.59114000 |
| H  | 9.00645700  | -0.89896400 | -0.70498400 |
| H  | 10.82293600 | 0.68953300  | -0.03861700 |
| H  | 11.14355700 | 1.08804500  | -1.81533100 |
| Cl | 8.98529200  | 3.90910200  | -0.28151900 |
| C  | 7.90455000  | 4.51533700  | -5.34857500 |
| C  | 8.86494600  | 4.64882700  | -6.35688000 |
| C  | 10.22369400 | 4.44156300  | -6.08165000 |
| C  | 10.62283700 | 4.10632400  | -4.78179300 |

|   |             |            |             |
|---|-------------|------------|-------------|
| C | 9.67126400  | 3.98655000 | -3.76070200 |
| C | 8.31456200  | 4.18141600 | -4.05400800 |
| H | 6.85651800  | 4.64530600 | -5.58323600 |
| H | 8.54561900  | 4.90848200 | -7.36090600 |
| H | 10.96239400 | 4.54432200 | -6.87002200 |
| H | 11.67236100 | 3.95308200 | -4.55226200 |
| H | 9.99329700  | 3.76349000 | -2.74537000 |
| N | 7.34379500  | 4.09940200 | -2.90785400 |
| H | 7.94177700  | 4.22753600 | -2.05413600 |
| H | 5.47692700  | 4.98236700 | -3.46792000 |

Coordinates of the optimized structure  $F_a$ :

| Elements | X          | Y           | Z           |
|----------|------------|-------------|-------------|
| C        | 3.57591500 | 5.79228700  | -6.78163300 |
| C        | 4.89499300 | 5.55811700  | -6.05279600 |
| C        | 4.56344400 | 7.99641300  | -5.56707500 |
| C        | 4.47050800 | 8.02464900  | -7.09089100 |
| H        | 2.75113800 | 5.84750400  | -6.05416600 |
| H        | 4.83139800 | 4.63207700  | -5.47341700 |
| H        | 3.57042000 | 8.07484000  | -5.10914100 |
| H        | 5.47793200 | 7.92307100  | -7.51980200 |
| O        | 3.59690700 | 6.98260800  | -7.59582000 |
| H        | 4.03996000 | 8.97490800  | -7.41312700 |
| H        | 5.18614200 | 8.82103200  | -5.21284500 |
| H        | 5.73957600 | 5.48079100  | -6.75298700 |
| H        | 3.37942200 | 4.95189100  | -7.45128100 |
| N        | 5.19335700 | 6.70486200  | -5.14511000 |
| C        | 6.10874700 | 6.63808100  | -4.20327000 |
| C        | 6.36182300 | 7.81031400  | -3.33607000 |
| C        | 7.57278600 | 8.51798000  | -3.43277100 |
| C        | 5.38664400 | 8.18275500  | -2.39245100 |
| C        | 7.79914500 | 9.60544400  | -2.58019500 |
| H        | 8.29590500 | 8.23394900  | -4.19502000 |
| C        | 5.63092500 | 9.25924800  | -1.53314200 |
| H        | 4.45943000 | 7.61774400  | -2.31349700 |
| C        | 6.83579600 | 9.97242000  | -1.62746500 |
| H        | 8.72152800 | 10.17094700 | -2.66556100 |
| H        | 4.88568800 | 9.54194400  | -0.79730200 |
| H        | 7.01916400 | 10.81405000 | -0.96744500 |
| C        | 6.85748000 | 5.35919800  | -3.99838200 |
| H        | 7.46199000 | 5.19455000  | -4.90929600 |
| H        | 6.14334800 | 4.52357700  | -3.94647500 |
| C        | 7.78171000 | 5.33198200  | -2.78018700 |
| C        | 7.06940000 | 5.15372800  | -1.46271800 |

|    |             |             |              |
|----|-------------|-------------|--------------|
| C  | 7.37774700  | 5.99422700  | -0.38217500  |
| C  | 6.12071000  | 4.12900300  | -1.28418800  |
| C  | 6.74997500  | 5.81863300  | 0.85679000   |
| H  | 8.11277400  | 6.78702400  | -0.51218500  |
| C  | 5.49757300  | 3.94507400  | -0.04432900  |
| H  | 5.85671000  | 3.45930000  | -2.10501100  |
| C  | 5.81152600  | 4.79125500  | 1.02941700   |
| H  | 6.99605400  | 6.47366100  | 1.68621400   |
| H  | 4.77269600  | 3.14802900  | 0.08745900   |
| H  | 5.33059500  | 4.64892500  | 1.99179600   |
| C  | 7.72807800  | 0.81678600  | -5.50340700  |
| C  | 7.98966200  | 1.99474300  | -4.79277100  |
| C  | 9.10168000  | 2.82318000  | -5.09985200  |
| C  | 9.93322500  | 2.40619100  | -6.17086000  |
| C  | 9.66232900  | 1.23430000  | -6.88085200  |
| C  | 8.56131300  | 0.42672400  | -6.55738200  |
| H  | 6.86963600  | 0.20793700  | -5.23452500  |
| H  | 7.27321600  | 2.25002100  | -4.00413300  |
| H  | 10.79698100 | 3.01140800  | -6.42304800  |
| H  | 10.32897100 | 0.93763800  | -7.68603600  |
| H  | 8.36266800  | -0.48644200 | -7.10852500  |
| C  | 9.38950300  | 4.05677800  | -4.35959700  |
| C  | 10.14033100 | 5.12531600  | -4.85235700  |
| O  | 10.72798600 | 5.16339800  | -5.99315100  |
| O  | 10.22768200 | 6.25294900  | -4.03428300  |
| C  | 10.99555100 | 7.37415600  | -4.56905000  |
| H  | 11.06239100 | 8.09187200  | -3.74811100  |
| H  | 11.98999000 | 7.04378300  | -4.87751900  |
| H  | 10.47163700 | 7.80767400  | -5.42868000  |
| C  | 10.49196100 | 5.77193600  | -9.90427700  |
| Pd | 9.76105700  | 5.75576100  | -7.84927100  |
| C  | 9.08656200  | 6.01732900  | -9.87738200  |
| C  | 10.94961600 | 4.58381200  | -9.27804300  |
| H  | 12.00341700 | 4.45069100  | -9.05424000  |
| H  | 10.33965400 | 3.68061700  | -9.30383700  |
| H  | 11.18597600 | 6.57540000  | -10.13430900 |
| H  | 8.70015500  | 6.99977200  | -10.12943200 |
| H  | 8.38421100  | 5.18893300  | -9.96982900  |
| Cl | 8.01376600  | 7.11254200  | -6.70255000  |
| C  | 10.58853200 | 4.92094400  | -1.43442600  |
| C  | 11.42481600 | 4.64652300  | -0.34546500  |
| C  | 11.36737700 | 3.40666900  | 0.30811300   |
| C  | 10.46670400 | 2.42606000  | -0.12884300  |
| C  | 9.62372300  | 2.68815800  | -1.21532900  |

|   |             |            |             |
|---|-------------|------------|-------------|
| C | 9.69829000  | 3.93018000 | -1.85348900 |
| H | 10.63990600 | 5.86799400 | -1.95985900 |
| H | 12.12629100 | 5.40298800 | -0.00889500 |
| H | 12.02080800 | 3.20536300 | 1.15043900  |
| H | 10.41856100 | 1.46448000 | 0.37061600  |
| H | 8.92480800  | 1.92626700 | -1.56049600 |
| N | 8.76027600  | 4.14202400 | -3.00184700 |
| H | 8.15555500  | 3.30775800 | -2.96348600 |
| H | 8.42866300  | 6.21094600 | -2.77037200 |

Coordinates of the optimized structure  $\mathbf{II}_b$ :

| Elements | X          | Y           | Z           |
|----------|------------|-------------|-------------|
| C        | 6.24970300 | 7.50846100  | -6.87287500 |
| C        | 7.07263900 | 7.30342600  | -5.60701300 |
| C        | 4.99811400 | 8.38473000  | -4.70383300 |
| C        | 5.31322600 | 9.44591700  | -5.75528000 |
| H        | 5.41365900 | 6.79379500  | -6.88901500 |
| H        | 7.42060800 | 6.26570100  | -5.54545000 |
| H        | 4.24689700 | 7.67347700  | -5.06814000 |
| H        | 6.06965000 | 10.14469300 | -5.36936400 |
| O        | 5.78426300 | 8.87153200  | -6.99709500 |
| H        | 4.40532100 | 10.01370200 | -5.97633700 |
| H        | 4.62846800 | 8.84839100  | -3.78655100 |
| H        | 7.93308300 | 7.98599000  | -5.59708800 |
| H        | 6.88004700 | 7.32378600  | -7.74534300 |
| N        | 6.23439600 | 7.60511500  | -4.39973500 |
| C        | 6.55976500 | 7.20613100  | -3.19478900 |
| C        | 5.67828000 | 7.40675200  | -2.02834900 |
| C        | 6.18462200 | 8.03193400  | -0.87245500 |
| C        | 4.37105400 | 6.87660500  | -2.03396700 |
| C        | 5.37369300 | 8.16407700  | 0.25875500  |
| H        | 7.19178100 | 8.44361900  | -0.86480700 |
| C        | 3.57886900 | 6.98658900  | -0.88670200 |
| H        | 4.00733800 | 6.33594600  | -2.90754500 |
| C        | 4.07340200 | 7.63566800  | 0.25498600  |
| H        | 5.75252100 | 8.67052400  | 1.14001400  |
| H        | 2.58036300 | 6.56287900  | -0.88237400 |
| H        | 3.45061400 | 7.72616100  | 1.13888900  |
| C        | 7.81751500 | 6.39274000  | -2.95173200 |
| H        | 8.29502400 | 6.74272000  | -2.03059900 |
| H        | 8.54041900 | 6.46057200  | -3.77049200 |
| C        | 7.29721300 | 4.98479800  | -2.83622600 |
| H        | 6.76678900 | 4.63204700  | -3.72034800 |
| C        | 7.04481400 | 4.29323700  | -1.62415300 |

|    |             |             |             |
|----|-------------|-------------|-------------|
| C  | 7.63571700  | 4.65142300  | -0.37722400 |
| C  | 6.18582700  | 3.15698300  | -1.68111700 |
| C  | 7.36177300  | 3.90655800  | 0.76420400  |
| H  | 8.30848300  | 5.50528600  | -0.31269700 |
| C  | 5.90302900  | 2.42863000  | -0.52824200 |
| H  | 5.73442100  | 2.89187400  | -2.63640000 |
| C  | 6.49358500  | 2.79722800  | 0.69151500  |
| H  | 7.81554500  | 4.17310100  | 1.71272800  |
| H  | 5.25048700  | 1.56398300  | -0.57907400 |
| H  | 6.28445100  | 2.22082300  | 1.58718200  |
| C  | 9.25868800  | 0.40904800  | -1.02406600 |
| C  | 9.39050500  | 1.51749400  | -1.86342100 |
| C  | 8.59539700  | 1.66142800  | -3.03658600 |
| C  | 7.67725100  | 0.60916300  | -3.32921800 |
| C  | 7.54912900  | -0.48976100 | -2.47871500 |
| C  | 8.32681100  | -0.59938400 | -1.31405700 |
| H  | 9.89558000  | 0.32333000  | -0.14843900 |
| H  | 10.16205000 | 2.24773700  | -1.62855300 |
| H  | 7.09864200  | 0.66587100  | -4.24510300 |
| H  | 6.84582800  | -1.27832600 | -2.73201900 |
| H  | 8.22914300  | -1.46279500 | -0.66358500 |
| C  | 8.69221600  | 2.86323700  | -3.84747100 |
| C  | 8.02912500  | 3.05961500  | -5.06168200 |
| O  | 7.28114300  | 2.20996000  | -5.68489800 |
| O  | 8.27311300  | 4.29221400  | -5.69265200 |
| C  | 7.94033400  | 4.33428400  | -7.10963200 |
| H  | 8.40070900  | 5.24981000  | -7.48933900 |
| H  | 8.35438500  | 3.46558900  | -7.62913900 |
| H  | 6.85171600  | 4.34835500  | -7.25046800 |
| C  | 3.80502800  | 1.13974800  | -7.15088200 |
| Pd | 5.12741100  | 2.38230800  | -5.93359600 |
| C  | 3.03649700  | 1.91838400  | -6.23783800 |
| C  | 4.82570700  | 0.31856200  | -6.60208200 |
| H  | 5.59607300  | -0.10336400 | -7.23955700 |
| H  | 4.68575500  | -0.16109200 | -5.63287900 |
| H  | 3.80217800  | 1.37623900  | -8.21122400 |
| H  | 2.41077200  | 2.72735100  | -6.60097200 |
| H  | 2.78122700  | 1.52097900  | -5.25561600 |
| Cl | 4.78851200  | 4.71480900  | -5.06364300 |
| C  | 11.16317900 | 4.12776100  | -5.07585900 |
| C  | 12.36698200 | 4.68308500  | -5.52090300 |
| C  | 13.07868500 | 5.59790600  | -4.72911500 |
| C  | 12.57940000 | 5.95044400  | -3.46405300 |
| C  | 11.38309300 | 5.39753800  | -3.00407600 |



|   |             |            |             |
|---|-------------|------------|-------------|
| C | 10.66515200 | 4.47616400 | -3.80380100 |
| H | 10.62252300 | 3.41589900 | -5.69054400 |
| H | 12.75574900 | 4.39682800 | -6.49334900 |
| H | 14.01097500 | 6.02195400 | -5.08682100 |
| H | 13.12988200 | 6.64482600 | -2.83672900 |
| H | 11.00544300 | 5.65079300 | -2.01154400 |
| N | 9.46452300  | 3.96525900 | -3.28488800 |
| H | 9.43394900  | 3.99006000 | -2.26675000 |

Coordinates of the optimized structure **II<sub>c</sub>**:

| Elements | X           | Y           | Z            |
|----------|-------------|-------------|--------------|
| C        | 9.59955000  | 11.52517000 | -9.93942700  |
| Pd       | 11.63650200 | 12.32004100 | -10.00932300 |
| C        | 9.95261400  | 11.95266400 | -11.25933200 |
| C        | 9.71303700  | 12.47869000 | -8.90190000  |
| H        | 9.68694100  | 12.16796800 | -7.86246000  |
| H        | 9.52719200  | 13.53487400 | -9.09490300  |
| H        | 9.51996500  | 10.46661100 | -9.70881000  |
| H        | 10.11006400 | 11.22084700 | -12.04523800 |
| H        | 9.71057600  | 12.96178700 | -11.59292700 |
| Cl       | 13.39030100 | 12.23024500 | -11.73344600 |
| C        | 17.37128900 | 17.17357200 | -13.42017100 |
| C        | 16.58975600 | 16.24088300 | -12.50141100 |
| C        | 18.06426100 | 14.60055100 | -13.69047900 |
| C        | 17.41972700 | 15.26112000 | -14.90598900 |
| H        | 18.39519400 | 17.30569600 | -13.03926700 |
| H        | 16.58797100 | 16.64990100 | -11.48747400 |
| H        | 19.07376700 | 14.99543700 | -13.53230100 |
| H        | 16.39815200 | 14.87870500 | -15.04457100 |
| O        | 17.39593900 | 16.70355800 | -14.78544800 |
| H        | 17.99839400 | 15.02573600 | -15.80189000 |
| H        | 18.13140900 | 13.51952000 | -13.82983200 |
| H        | 15.55526400 | 16.13192700 | -12.84876700 |
| H        | 16.88883400 | 18.15287500 | -13.43649100 |
| N        | 17.22793400 | 14.88415000 | -12.48143200 |
| C        | 16.97412100 | 13.98656900 | -11.54636000 |
| C        | 17.68963800 | 12.69765800 | -11.52163300 |
| C        | 16.95690100 | 11.49520500 | -11.45056900 |
| C        | 19.10062900 | 12.66909900 | -11.49965100 |
| C        | 17.64006100 | 10.27527400 | -11.39429100 |
| H        | 15.86661300 | 11.50939100 | -11.47852300 |
| C        | 19.77143600 | 11.44713400 | -11.40979900 |
| H        | 19.66841100 | 13.59749800 | -11.51001300 |
| C        | 19.04209000 | 10.24818200 | -11.36667000 |

|   |             |             |              |
|---|-------------|-------------|--------------|
| H | 17.07740700 | 9.34800500  | -11.37159800 |
| H | 20.85545700 | 11.42727600 | -11.37498100 |
| H | 19.56463300 | 9.29873300  | -11.30990500 |
| C | 15.93085800 | 14.22123000 | -10.50305300 |
| H | 15.12549500 | 13.49055500 | -10.72594000 |
| C | 16.48263800 | 14.00996600 | -9.07840600  |
| H | 16.88076600 | 12.98614600 | -9.02132000  |
| C | 17.62002900 | 14.97452500 | -8.79534200  |
| C | 17.47983100 | 16.36833200 | -8.95247000  |
| C | 18.87212900 | 14.46488000 | -8.40403300  |
| C | 18.56110700 | 17.22427400 | -8.71185800  |
| H | 16.51400700 | 16.79678900 | -9.22095100  |
| C | 19.95647100 | 15.32014100 | -8.16286400  |
| H | 19.00093700 | 13.38712900 | -8.29849500  |
| C | 19.80310000 | 16.70447300 | -8.31638900  |
| H | 18.43189600 | 18.29717400 | -8.81775100  |
| H | 20.91252600 | 14.90880100 | -7.85444200  |
| H | 20.63779600 | 17.37103800 | -8.12428200  |
| C | 13.14144100 | 17.07650400 | -8.92475700  |
| C | 13.68913700 | 15.78741800 | -8.93694900  |
| C | 14.61786200 | 15.39723600 | -7.95130100  |
| C | 14.96049000 | 16.31424900 | -6.94491000  |
| C | 14.40788200 | 17.60070300 | -6.92824600  |
| C | 13.50208300 | 17.99102100 | -7.92390900  |
| H | 12.42181400 | 17.36096000 | -9.68684900  |
| H | 13.36230200 | 15.08566200 | -9.70125600  |
| H | 15.66726400 | 16.00968500 | -6.17853800  |
| H | 14.68185300 | 18.29281700 | -6.13822400  |
| H | 13.07049400 | 18.98709400 | -7.91152900  |
| C | 15.33381800 | 14.04272800 | -7.98817300  |
| C | 14.36028200 | 12.88257200 | -8.34668200  |
| O | 13.13792400 | 13.00567000 | -8.54210300  |
| O | 14.99849800 | 11.70105900 | -8.38352800  |
| C | 14.21445200 | 10.47519800 | -8.56366800  |
| H | 14.93139200 | 9.66488000  | -8.44523500  |
| H | 13.43899800 | 10.42502100 | -7.79329600  |
| H | 13.76544000 | 10.46963700 | -9.56441700  |
| C | 16.04903500 | 12.75486400 | -4.51249800  |
| C | 15.42624000 | 12.36061000 | -3.32681800  |
| C | 14.04119600 | 12.52309900 | -3.16050800  |
| C | 13.29591800 | 13.09475000 | -4.19862100  |
| C | 13.90776500 | 13.49871600 | -5.39320800  |
| C | 15.29754200 | 13.32765400 | -5.55988100  |
| H | 17.12256200 | 12.62094800 | -4.63579000  |

|   |             |             |              |
|---|-------------|-------------|--------------|
| H | 16.02103300 | 11.92307800 | -2.53060200  |
| H | 13.55859700 | 12.21685900 | -2.23843200  |
| H | 12.22612100 | 13.24100500 | -4.07953200  |
| H | 13.30779000 | 13.97330400 | -6.16449600  |
| N | 15.97390000 | 13.70949100 | -6.72995200  |
| H | 16.96766800 | 13.51460300 | -6.75858000  |
| H | 15.47175500 | 15.20708300 | -10.59119700 |

Coordinates of the optimized structure **II<sub>a</sub>**:

| Elements | X           | Y           | Z           |
|----------|-------------|-------------|-------------|
| C        | 11.86937900 | 10.71895000 | 1.03335500  |
| C        | 10.92566200 | 10.75151500 | -0.16294200 |
| C        | 12.35745600 | 8.78335000  | -0.76225900 |
| C        | 13.44482100 | 9.83879500  | -0.58169700 |
| H        | 11.59244900 | 9.89428700  | 1.70754000  |
| H        | 9.89779200  | 10.87937800 | 0.18617500  |
| H        | 12.31769600 | 8.13519000  | 0.12025900  |
| H        | 13.46857400 | 10.51087800 | -1.45213100 |
| O        | 13.25364600 | 10.60065500 | 0.63262300  |
| H        | 14.41898400 | 9.35199600  | -0.50003600 |
| H        | 12.55333800 | 8.16415400  | -1.64095800 |
| H        | 11.18799900 | 11.57761100 | -0.83589500 |
| H        | 11.78107800 | 11.65372200 | 1.59055700  |
| N        | 11.03416900 | 9.46528900  | -0.93021700 |
| C        | 10.08971000 | 9.03384400  | -1.74440900 |
| C        | 10.18493400 | 7.72072700  | -2.40899600 |
| C        | 9.91313300  | 7.61627700  | -3.78928000 |
| C        | 10.45549600 | 6.55303200  | -1.66151700 |
| C        | 9.96952200  | 6.36919500  | -4.41926000 |
| H        | 9.68850900  | 8.49923800  | -4.38247700 |
| C        | 10.46624900 | 5.30554100  | -2.28975400 |
| H        | 10.61362900 | 6.61431700  | -0.58678700 |
| C        | 10.23874700 | 5.21322400  | -3.67215600 |
| H        | 9.79780900  | 6.30071900  | -5.48823500 |
| H        | 10.65334900 | 4.40950300  | -1.70798000 |
| H        | 10.26752000 | 4.24539500  | -4.16168000 |
| C        | 8.84897600  | 9.82865200  | -2.01746200 |
| H        | 8.66855400  | 9.77799000  | -3.09874200 |
| C        | 7.64294800  | 9.18180500  | -1.27113600 |
| H        | 7.77173100  | 8.08739600  | -1.29477200 |
| C        | 7.64822600  | 9.59415400  | 0.18903500  |
| C        | 7.49146600  | 10.93315100 | 0.59971900  |
| C        | 7.89020800  | 8.60867800  | 1.16347000  |
| C        | 7.57664000  | 11.26972200 | 1.95628300  |

|   |            |             |             |
|---|------------|-------------|-------------|
| H | 7.29624700 | 11.71332700 | -0.13368800 |
| C | 7.98109700 | 8.94579900  | 2.52275100  |
| H | 7.99682400 | 7.56774300  | 0.85675000  |
| C | 7.82751300 | 10.28022300 | 2.92119100  |
| H | 7.44126900 | 12.30224600 | 2.26281600  |
| H | 8.15987600 | 8.17339400  | 3.26414600  |
| H | 7.88847500 | 10.54692700 | 3.97134800  |
| C | 6.36621800 | 13.00656400 | -3.49805500 |
| C | 6.63173700 | 11.63949600 | -3.33780200 |
| C | 5.99666600 | 10.89942000 | -2.31997300 |
| C | 5.07597500 | 11.56392400 | -1.48832100 |
| C | 4.80772200 | 12.92700900 | -1.65166200 |
| C | 5.45754000 | 13.65905600 | -2.65514900 |
| H | 6.85733900 | 13.55477700 | -4.29639600 |
| H | 7.29302600 | 11.15168100 | -4.04462200 |
| H | 4.56939200 | 10.99819500 | -0.71270300 |
| H | 4.08431000 | 13.41195500 | -1.00369800 |
| H | 5.24563200 | 14.71516300 | -2.78948900 |
| C | 6.28217200 | 9.41265100  | -2.04274600 |
| C | 6.47633500 | 8.57328000  | -3.34606700 |
| O | 6.80995600 | 8.99431800  | -4.46085100 |
| O | 6.30906200 | 7.25035100  | -3.08617300 |
| C | 6.22544700 | 6.34638600  | -4.23036000 |
| H | 6.09660900 | 5.35374100  | -3.80281100 |
| H | 5.35899900 | 6.62250200  | -4.83874500 |
| H | 7.13438400 | 6.40449000  | -4.83660000 |
| C | 3.11796000 | 7.70379000  | -0.92416100 |
| C | 1.83588700 | 7.37009600  | -1.36681900 |
| C | 1.36885100 | 7.82709300  | -2.60935000 |
| C | 2.20482800 | 8.62936200  | -3.39551700 |
| C | 3.49188000 | 8.97456700  | -2.96202200 |
| C | 3.96201000 | 8.50660800  | -1.71755500 |
| H | 3.47461700 | 7.34169500  | 0.03884100  |
| H | 1.19946900 | 6.75079200  | -0.74173000 |
| H | 0.37276500 | 7.56748000  | -2.95184700 |
| H | 1.85384300 | 9.00133500  | -4.35373600 |
| H | 4.09797400 | 9.63054200  | -3.58294200 |
| N | 5.24567200 | 8.80923200  | -1.23344300 |
| H | 5.53834300 | 8.30946800  | -0.40194300 |
| H | 8.94476900 | 10.88541600 | -1.75595100 |

Coordinates of the optimized structure **II<sub>c</sub>**:

| Elements | X           | Y           | Z           |
|----------|-------------|-------------|-------------|
| C        | -2.53031600 | -0.67678600 | -0.55102500 |

|    |             |             |             |
|----|-------------|-------------|-------------|
| Pd | -3.07998600 | 0.71468300  | 1.02990400  |
| C  | -2.63693900 | -1.32874600 | 0.72903100  |
| C  | -1.60954800 | 0.38190400  | -0.65730900 |
| H  | -1.63673800 | 1.05109200  | -1.51143800 |
| H  | -0.70595500 | 0.40382200  | -0.04998000 |
| H  | -3.29436900 | -0.82692300 | -1.30784500 |
| H  | -3.47357600 | -1.98994400 | 0.93311700  |
| H  | -1.75052000 | -1.48344400 | 1.34338100  |
| Cl | -4.27853700 | 1.09953400  | 3.00351200  |

## Supplementary Methods

### 1. General Information

All  $^1\text{H}$  NMR (400 MHz),  $^{13}\text{C}$  NMR (100 MHz) and  $^{19}\text{F}$  NMR (376 MHz) spectra were recorded on Bruker Ascend400 spectrometers in Acetone- $d_6$  or  $\text{CDCl}_3$ . Tetramethylsilane (TMS) served as an internal standard ( $\delta = 0$ ) for  $^1\text{H}$  NMR, and  $\text{CDCl}_3$  was used as internal standard ( $\delta = 77.0$ ) for  $^{13}\text{C}$  NMR. Chemical shifts are reported in parts per million as follows: chemical shift, multiplicity (s = singlet, d = doublet, t = triplet, q = quartet, m = multiplet, br = broad). Infrared (IR) spectra were recorded on a NICOLET NEXUS 670 FT-IR spectrometer,  $\nu_{\text{max}}$  in  $\text{cm}^{-1}$ . Melting points were uncorrected. Specific rotation was performed on Rudolph Research Analytical Autopol VI Polarimeter ( $\lambda = 589 \text{ nm}$ ,  $T = 20 \text{ }^\circ\text{C}$ ). The racemic standards used in HPLC studies were prepared according to the general procedure using racemic BINOL-derived phosphoric acid catalyst *rac-1a*. Yields for all compounds were combined yields for all isomers unless otherwise indicated.

### 2. General procedure

**2.1 General Procedure 1 for preliminary optimization of the three-component reactions (Table 1 and Table SI 1):** To a 10-mL test tube with a plug  $[\text{PdCl}(\eta^3\text{-C}_3\text{H}_5)]_2$  (5.0 mol%), racemic phosphoric acid *rac-1a* (10 mol%), enamine **3a** (0.22 mmol, 1.1 eq), imine **4a** (0.2 mmol, 1.0 eq) and 4Å molecular sieve (0.1 g) and 1.5 mL of  $\text{CH}_2\text{Cl}_2$  were added and stirred in at ambient temperature or  $0^\circ\text{C}$ . The diazo compound **2a** (0.3 mmol, 1.5 eq) in 1.0 mL  $\text{CH}_2\text{Cl}_2$  was introduced to the suspension over 1 h *via* a syringe pump. After completion of the addition, the mixture was stirred for another 5 min and then was hydrolyzed by eluted through short column chromatography on silica gel (eluent: EtOAc/petroleum ether = 1/10~5) to give a crude product

which was subjected to  $^1\text{H}$  NMR spectroscopy analysis for the determination of diastereoselectivity and to chiral HPLC for the ee values. Purification of the crude products by flash chromatography on silica gel (eluent: EtOAc/ petroleum ether = 1/80~50/1) afforded pure products.

**2.2 General Procedure 2 for optimization of the three-component reactions (Table 2 and Table S2):** A suspension of  $[\text{PdCl}(\eta^3\text{-C}_3\text{H}_5)]_2$  (5.0 mol%), chiral phosphoric acid **1** (5 mol%), imine **4** (0.2 mmol, 1.0 eq) and 4Å molecular sieve (0.1 g) was stirred in 1.5 mL of solvent at corresponding temperature and then the mixture of diazo compound **2** (0.3 mmol, 1.5 eq) and enamine **3a** (0.22 mmol, 1.1 eq) in 1.0 mL solvent was introduced to the suspension over 1 h *via* a syringe pump. Subsequent operations were similar to those in *general procedure 1*.

### 3. Preparation of chiral palladium phosphate

The chiral palladium-phosphate complex was prepared to verify its structure. The silver salt of phosphate was synthesized<sup>1-2</sup> and converted into the palladium phosphate complex.

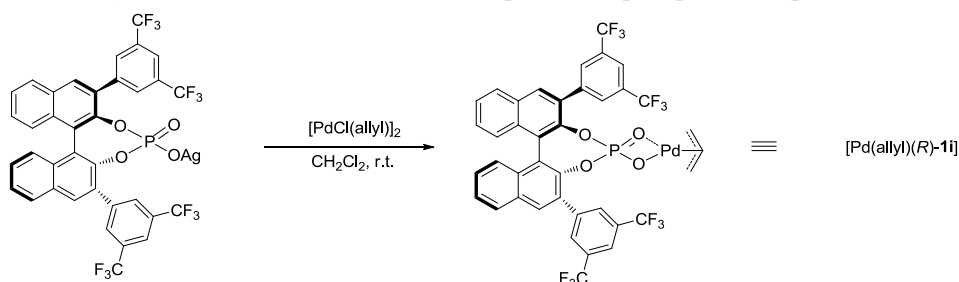

To a flask (25 mL) with a stir bar was added silver phosphate (200.1 mg, 1.0 eq.) and 5 mL  $\text{CH}_2\text{Cl}_2$  in dark. Subsequently allylpalladium chloride dimer (41.5 mg, 1.0 eq.) was added to the flask in one portion under vigorous stirring and the stirring remained overnight. The mixture was filtered and the filtrate was concentrated to give a fluffy yellowish powder (quant.).

#### Allyl((2,6-bis(3,5-bis(trifluoromethyl)phenyl)-4-oxidodinaaphtho[2,1-d:1',2'-f][1,3,2]dioxaphosphepin-4-yl)oxy)palladium $[\text{Pd}(\text{allyl})(R)\text{-1i}]$ .

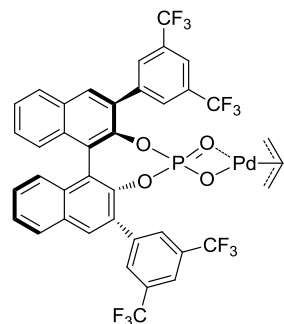

$^1\text{H}$  NMR (400 MHz,  $\text{CDCl}_3$ )  $\delta$  8.43 – 7.73 (m, 9H), 7.59 – 7.47 (m, 2H), 7.45 – 7.28 (m, 5H), 4.90 (s, 1H), 3.13 – 2.48 (m, 2H), 1.93 (br, 2H)..

$^{13}\text{C}$  NMR (100 MHz,  $\text{CDCl}_3$ )  $\delta$  145.1, 140.2, 132.7, 131.5, 131.3, 131.0, 130.9, 130.1, 128.4, 127.1, 127.0, 126.0, 124.8, 124.2, 123.1, 122.0, 120.9, 22.6.

$^{31}\text{P}$  NMR (162 MHz,  $\text{CDCl}_3$ )  $\delta$  10.43-9.49 (br).

$^{19}\text{F}$  NMR (376 MHz,  $\text{CDCl}_3$ )  $\delta$  -62.46.

**HRMS(ESI)** Calcd. for  $\text{C}_{39}\text{H}_{21}\text{O}_4\text{NaPF}_{12}\text{Pd}$  ( $\text{M}+\text{Na}$ )<sup>+</sup> 940.9918, Found: 940.9882.

## Analytical data of the products

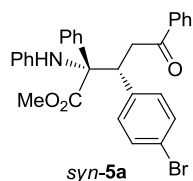

### (2S,3R)-methyl 3-(4-bromophenyl)-5-oxo-2,5-diphenyl-2-(phenylamino)pentanoate (**5a**).

$^1\text{H}$  NMR (400 MHz, Acetone)  $\delta$  7.82 (dd,  $J = 8.4, 1.2$  Hz, 2H), 7.70 – 7.63 (m, 2H), 7.61 – 7.55 (m, 1H), 7.49 – 7.42 (m, 2H), 7.37 – 7.31 (m, 5H), 7.06 (d,  $J = 8.5$  Hz, 2H), 7.00 (dd,  $J = 8.6, 7.4$  Hz, 2H), 6.62 (m, 1H), 6.49 (dd,  $J = 8.6, 0.9$  Hz, 2H), 5.57 (s, 1H), 4.50 (dd,  $J = 11.2, 2.7$  Hz, 1H), 3.81 (dd,  $J = 17.4, 11.2$  Hz, 1H), 3.54 (s, 3H), 3.46 (dd,  $J = 17.4, 2.7$  Hz, 1H);  $^{13}\text{C}$  NMR (100 MHz, Acetone)  $\delta$  197.42, 173.65, 146.88, 139.19, 137.92, 137.84, 133.94, 132.76, 131.39, 130.06, 129.45, 129.16, 128.67, 128.61, 128.50, 121.54, 118.54, 116.42, 70.99, 52.72, 50.87, 40.70; FT-IR(KBr)  $\tilde{\nu}$  3399, 3358, 3054, 2949, 1727, 1691, 1678, 1599, 1500, 1446, 1430, 1325, 1266, 1180, 1073, 1007, 814, 748, 691, 657, 582  $\text{cm}^{-1}$ ; HRMS(ESI)  $m/z$ : calcd. for  $\text{C}_{39}\text{H}_{38}\text{NO}_3\text{NaBr}$  ( $\text{M}+\text{Na}$ ) $^+$  550.0994, found 550.1005.

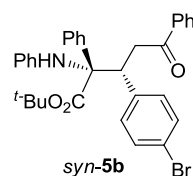

### (2S,3R)-tert-butyl 3-(4-bromophenyl)-5-oxo-2,5-diphenyl-2-(phenylamino)pentanoate (**5b**)

$^1\text{H}$  NMR (400 MHz,  $\text{CDCl}_3$ )  $\delta$  7.71 - 6.67 (m, 2H), 7.64 - 7.60 (m, 2H), 7.51 - 7.46 (m, 1H), 7.40 – 7.25 (m, 7H), 7.15 – 6.87 (m, 6H), 6.71 - 6.66 (m, 1H), 6.42 (d,  $J = 7.8$  Hz, 1H), 4.90 (s, 1H), 4.63 (dd,  $J = 11.3, 1.9$  Hz, 1H), 3.61 (dd,  $J = 17.4, 11.5$  Hz, 1H), 3.41 (dd,  $J = 17.4, 2.3$  Hz, 1H), 1.15 (s, 9H);  $^{13}\text{C}$  NMR (101 MHz,  $\text{CDCl}_3$ )  $\delta$  197.5, 171.46, 145.78, 137.9, 137.2, 136.6, 133.2, 131.6, 131.1, 128.7, 128.6, 128.3, 127.9, 127.7, 121.5, 117.9, 115.9, 82.7, 77.4, 77.0, 76.7, 70.1, 48.2, 41.06, 27.59; FT-IR(KBr)  $\tilde{\nu}$  3402, 3051, 2975, 2926, 1727, 1687, 1600, 1502, 1447, 1367, 1325, 1262, 1247, 1151, 1073, 1007, 815, 744, 684, 663, 546  $\text{cm}^{-1}$ ; HRMS(ESI)  $m/z$ : calcd. for  $\text{C}_{33}\text{H}_{33}\text{NO}_3\text{Br}$  ( $\text{M}+\text{H}$ ) $^+$  570.1644, found 570.1644; HPLC (CHIRALCEL OD-H,  $\lambda = 254$  nm, hexane/2-propanol = 150/1, Flow rate = 1.0 mL/min), 84% ee,  $t_{\text{major}} = 14.57$  min,  $t_{\text{minor}} = 13.05$  min.

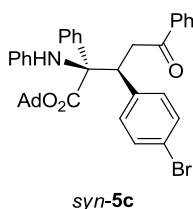

### (2S,3R)-adamantan-1-yl 3-(4-bromophenyl)-5-oxo-2,5-diphenyl-2-(phenylamino)pentanoate (**5c**)

$^1\text{H}$  NMR (400 MHz,  $\text{CDCl}_3$ )  $\delta$  7.75 – 7.66 (m, 2H), 7.64 – 7.56 (m, 2H), 7.48 (dd,  $J = 10.5, 4.3$  Hz, 1H), 7.39 – 7.29 (m, 7H), 7.09 - 7.02 (m, 1H), 6.68 (t,  $J = 7.3$  Hz, 1H), 6.41 (d,  $J = 7.8$  Hz, 1H), 4.88 (s, 1H), 4.62 (dd,  $J = 11.4, 2.2$  Hz, 1H), 3.61 (dd,  $J = 17.4, 11.5$  Hz, 1H), 3.41 (dd,  $J = 17.4, 2.4$  Hz, 1H), 2.04 (s, 3H), 1.76 (q,  $J = 11.4$  Hz, 6H), 1.62 – 1.41 (m, 6H);  $^{13}\text{C}$  NMR (100 MHz,  $\text{CDCl}_3$ )  $\delta$  197.5, 171.0, 145.7, 137.8, 137.3, 136.7, 133.2, 131.6, 131.0, 128.6, 128.5, 128.3, 127.9, 127.7, 121.4, 117.8,

115.9, 82.8, 70.1, 48.3, 40.9, 40.8, 36.0, 30.7; FT-IR(KBr)  $\tilde{\nu}$  3404, 3052, 2912, 2852, 1728, 1687, 1600, 1502, 1447, 1354, 1322, 1259, 1235, 1176, 1073, 1053, 965, 747, 696, 684  $\text{cm}^{-1}$ ; HRMS(ESI)  $m/z$ : calcd. for  $\text{C}_{39}\text{H}_{38}\text{NO}_3\text{NaBr}$  ( $\text{M}+\text{Na}$ )<sup>+</sup> 670.1933, found 670.1929; HPLC (CHIRALCEL OD-H,  $\lambda$  = 254 nm, hexane/2-propanol = 99/1, Flow rate = 1.0 mL/min), 88-90% ee,  $t_{\text{major}}$  = 5.74 min,  $t_{\text{minor}}$  = 8.47 min.

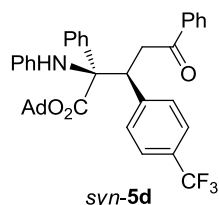

**(2S,3R)-adamantan-1-yl 5-oxo-2,5-diphenyl-2-(phenylamino)-3-(4-(trifluoromethyl)phenyl)pentanoate (5d).**

<sup>1</sup>H NMR (400 MHz,  $\text{CDCl}_3$ )  $\delta$  7.78 – 7.72 (m, 2H), 7.67 – 7.58 (m, 2H), 7.55 – 7.47 (m, 1H), 7.42 – 7.35 (m, 2H), 7.35 – 7.29 (m, 3H), 7.03 (dd,  $J$  = 8.5, 7.4 Hz, 2H), 6.71 – 6.64 (m, 1H), 6.56 (ddd,  $J$  = 21.7, 14.0, 4.8 Hz, 2H), 6.44 – 6.38 (m, 2H), 5.07 (d,  $J$  = 3.9 Hz, 1H), 4.80 (dd,  $J$  = 11.5, 2.4 Hz, 1H), 3.61 (dd,  $J$  = 17.3, 11.6 Hz, 1H), 3.38 (dd,  $J$  = 17.3, 2.7 Hz, 1H), 2.01 (Br, 3H), 1.75 (M, 6H), 1.51 (M, 6H); <sup>13</sup>C NMR (100 MHz,  $\text{CDCl}_3$ )  $\delta$  197.34, 170.85, 145.61, 143.11, 137.26, 136.53, 133.29, 130.32, 128.68, 128.59, 128.55, 128.34, 127.92, 127.80, 124.92 – 124.68 (m), 117.97, 115.99, 82.93, 70.10, 48.55, 40.89, 40.73, 35.92, 30.71; FT-IR(KBr)  $\tilde{\nu}$  3400, 3056, 2913, 2854, 1725, 1691, 1600, 1501, 1447, 1424, 1325, 1236, 1166, 1126, 1068, 1050, 1017, 965, 832, 751, 691, 620  $\text{cm}^{-1}$ ; HRMS(ESI)  $m/z$ : calcd. for  $\text{C}_{40}\text{H}_{38}\text{NO}_3\text{F}_3\text{Na}$  ( $\text{M}+\text{Na}$ )<sup>+</sup> 660.2701, found 660.2717; HPLC (CHIRALPAK IC,  $\lambda$  = 254 nm, hexane/2-propanol = 99.4/0.6, Flow rate = 1.0 mL/min), 92% ee,  $t_{\text{major}}$  = 5.44 min,  $t_{\text{minor}}$  = 6.86 min.

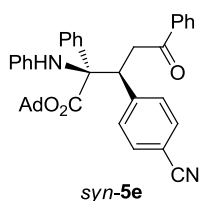

**(2S,3R)-adamantan-1-yl 3-(4-cyanophenyl)-5-oxo-2,5-diphenyl-2-(phenylamino)pentanoate (5e).**

$[\alpha]_{\text{D}}^{20}$  = -59.3 ( $c$  = 0.135,  $\text{CHCl}_3$ ); <sup>1</sup>H NMR (400 MHz,  $\text{CDCl}_3$ )  $\delta$  7.72 – 7.67 (m, 2H), 7.59 – 7.52 (m, 2H), 7.52 – 7.46 (m, 3H), 7.39 – 7.28 (m, 7H), 7.08 (dd,  $J$  = 8.5, 7.4 Hz, 2H), 6.77 – 6.65 (m, 1H), 6.44 (d,  $J$  = 7.7 Hz, 2H), 4.92 (s, 1H), 4.75 (dd,  $J$  = 11.2, 2.5 Hz, 1H), 3.65 (dd,  $J$  = 17.6, 11.3 Hz, 1H), 3.54 (dd,  $J$  = 17.6, 2.7 Hz, 1H), 2.04 (Br, 3H), 1.75 (M, 6H), 1.64 – 1.44 (m, 6H); <sup>13</sup>C NMR (100 MHz,  $\text{CDCl}_3$ )  $\delta$  197.20, 170.72, 145.39, 144.76, 137.07, 136.45, 133.40, 131.55, 130.86, 128.75, 128.64, 128.45, 128.35, 127.92, 127.90, 118.80, 118.11, 116.02, 111.20, 83.17, 77.38, 77.06, 76.74, 69.99, 48.46, 40.91, 40.80, 35.92, 30.73; FT-IR(KBr)  $\tilde{\nu}$  3401, 3349, 3056, 2910, 2853, 2227, 1726, 1677, 1601, 1501, 1449, 1354, 1252, 1231, 1184, 1052, 1019, 964, 877, 829, 750, 705, 688, 562  $\text{cm}^{-1}$ ; HRMS(ESI)  $m/z$ : calcd. for  $\text{C}_{40}\text{H}_{38}\text{N}_2\text{O}_3\text{Na}$  ( $\text{M}+\text{Na}$ )<sup>+</sup> 617.2780, found 617.2778; HPLC (CHIRALPAK IC,  $\lambda$  = 254 nm, hexane/2-propanol = 98.5/1.5, Flow rate = 1.0 mL/min), 86% ee,  $t_{\text{major}}$  = 29.20 min,  $t_{\text{minor}}$  = 39.40 min.



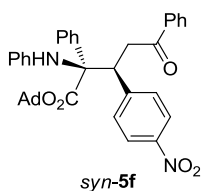

**(2S,3R)-adamantan-1-yl 3-(4-nitrophenyl)-5-oxo-2,5-diphenyl-2-(phenylamino)pentanoate (5f)**

$[\alpha]_{\text{D}}^{20} = -10.4$  ( $c = 0.08$ ,  $\text{CHCl}_3$ );  $^1\text{H NMR}$  (400 MHz,  $\text{CDCl}_3$ )  $\delta$  8.07 (d,  $J = 8.8$  Hz, 1H), 7.77 – 7.64 (m, 1H), 7.60 – 7.55 (m, 1H), 7.52 – 7.46 (m, 1H), 7.42 – 7.33 (m, 1H), 7.09 (dd,  $J = 8.4, 7.4$  Hz, 1H), 6.72 (t,  $J = 7.3$  Hz, 1H), 6.46 (d,  $J = 7.8$  Hz, 1H), 4.93 (s, 1H), 4.83 (dd,  $J = 11.2, 2.6$  Hz, 1H), 3.68 (dd,  $J = 17.7, 11.2$  Hz, 1H), 3.58 (dd,  $J = 17.7, 2.7$  Hz, 1H), 2.05 (s, 1H), 1.77 (q,  $J = 11.4$  Hz, 1H), 1.54 (q,  $J = 12.5$  Hz, 1H);  $^{13}\text{C NMR}$  (100 MHz,  $\text{CDCl}_3$ )  $\delta$  197.12, 170.69, 147.15, 146.94, 145.31, 137.02, 136.39, 133.44, 130.95, 128.78, 128.65, 128.50, 128.31, 127.98, 127.90, 122.90, 118.16, 116.05, 83.30, 69.96, 48.10, 41.06, 40.82, 35.90, 30.73; FT-IR(KBr)  $\tilde{\nu}$  3372, 3056, 2912, 2852, 1722, 1677, 1599, 1513, 1501, 1446, 1344, 1229, 1179, 1110, 1049, 857, 753, 711, 690  $\text{cm}^{-1}$ ; HRMS(ESI)  $m/z$ : calcd. for  $\text{C}_{39}\text{H}_{38}\text{N}_2\text{O}_5\text{Na}$  ( $\text{M}+\text{Na}$ ) $^+$  637.2678, found 637.2698; HPLC (CHIRALCEL OD-H,  $\lambda = 254$  nm, hexane/2-propanol = 97/3, Flow rate = 1.0 mL/min), 90% ee,  $t_{\text{major}} = 9.52$  min,  $t_{\text{minor}} = 11.16$  min.

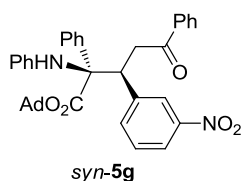

**(2S,3R)-adamantan-1-yl 3-(3-nitrophenyl)-5-oxo-2,5-diphenyl-2-(phenylamino)pentanoate (5g)**

$^1\text{H NMR}$  (400 MHz,  $\text{CDCl}_3$ )  $\delta$  8.13 (s, 1H), 8.07 (dd,  $J = 8.2, 1.3$  Hz, 1H), 7.74 – 7.66 (m, 2H), 7.62 – 7.54 (m, 3H), 7.52 – 7.46 (m, 1H), 7.43 – 7.31 (m, 6H), 7.10 (dd,  $J = 8.3, 7.5$  Hz, 2H), 6.78 – 6.68 (m, 1H), 6.48 (d,  $J = 7.8$  Hz, 2H), 4.99 (s, 1H), 4.87 (dd,  $J = 11.1, 2.5$  Hz, 1H), 3.68 (dd,  $J = 17.8, 11.2$  Hz, 1H), 3.58 (dd,  $J = 17.8, 2.7$  Hz, 1H), 2.04 (br, 3H), 1.84 – 1.70 (m, 6H), 1.60 – 1.46 (m, 7H);  $^{13}\text{C NMR}$  (100 MHz,  $\text{CDCl}_3$ )  $\delta$  197.16, 170.71, 147.73, 145.29, 141.36, 137.09, 136.39, 136.21, 133.41, 128.78, 128.64, 128.58, 128.19, 127.98, 127.92, 125.28, 122.43, 118.15, 116.21, 83.37, 47.74, 41.11, 40.72, 35.89, 30.75; FT-IR(KBr)  $\tilde{\nu}$  3393, 3057, 2912, 2853, 1725, 1688, 1600, 1530, 1498, 1447, 1347, 1253, 1180, 1102, 1050, 753, 691  $\text{cm}^{-1}$ ; HRMS(ESI)  $m/z$ : calcd. for  $\text{C}_{39}\text{H}_{38}\text{N}_2\text{O}_5\text{Na}$  ( $\text{M}+\text{Na}$ ) $^+$  637.2678, found 637.2663; HPLC (CHIRALPAK IC,  $\lambda = 254$  nm, hexane/2-propanol = 99.5/0.5, Flow rate = 1.0 mL/min), 86% ee,  $t_{\text{major}} = 15.84$  min,  $t_{\text{minor}} = 19.48$  min.

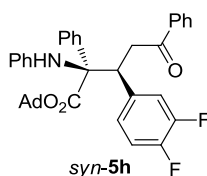

**(2S,3R)-adamantan-1-yl 3-(3,4-difluorophenyl)-5-oxo-2,5-diphenyl-2-(phenylamino)pentanoate (5h)**

$[\alpha]_{\text{D}}^{20} = -36.4$  ( $c = 0.4483$ ,  $\text{CHCl}_3$ );  $^1\text{H NMR}$  (400 MHz,  $\text{CDCl}_3$ )  $\delta$  7.78 – 7.72 (m, 2H), 7.67 – 7.58 (m, 2H), 7.55 – 7.47 (m, 1H), 7.42 – 7.35 (m, 2H), 7.35 – 7.29 (m, 3H), 7.03 (dd,  $J = 8.5, 7.4$  Hz, 2H), 6.71 – 6.64 (m, 1H), 6.56 (ddd,  $J = 21.7, 14.0, 4.8$  Hz, 2H), 6.44 – 6.38 (m, 2H), 5.07 (d,  $J = 3.9$  Hz, 1H),

4.80 (dd,  $J = 11.5, 2.4$  Hz, 1H), 3.61 (dd,  $J = 17.3, 11.6$  Hz, 1H), 3.38 (dd,  $J = 17.3, 2.7$  Hz, 1H), 2.01 (Br, 3H), 1.75 (M, 6H), 1.51 (M, 6H);  $^{13}\text{C}$  NMR (100 MHz,  $\text{CDCl}_3$ )  $\delta$  196.94, 170.94, 145.93, 136.55, 133.24, 131.61 – 130.58 (m), 129.24, 128.60, 128.54, 127.91, 127.84, 127.66, 121.81 (dd,  $J = 13.8, 3.9$  Hz), 118.25, 116.01, 110.74 (dd,  $J = 20.8, 3.1$  Hz), 103.49 (dd,  $J = 28.2, 25.2$  Hz), 82.53, 70.73, 40.60, 39.92, 35.98, 30.72;  $^{19}\text{F}$  NMR (376 MHz,  $\text{CDCl}_3$ )  $\delta$  -110.15 (s), -111.30 – -112.30 (m); FT-IR(KBr)  $\tilde{\nu}$  3359, 3057, 2910, 2853, 1725, 1687, 1600, 1501, 1447, 1354, 1255, 1216, 1180, 1139, 1094, 1051, 966, 851, 749, 691  $\text{cm}^{-1}$ ; HRMS(ESI)  $m/z$ : calcd. for  $\text{C}_{39}\text{H}_{37}\text{NO}_3\text{F}_2\text{Na}$  ( $\text{M}+\text{Na}$ ) $^+$  628.2639, found 628.2657.

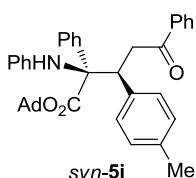

**(2S,3R)-adamantan-1-yl 5-oxo-2,5-diphenyl-2-(phenylamino)-3-(p-tolyl)pentanoate (5i).**

$^1\text{H}$  NMR (400 MHz,  $\text{CDCl}_3$ )  $\delta$  7.71 – 6.66 (m, 4H), 7.50 – 7.44 (m, 1H), 7.37 – 7.29 (m, 6H), 7.08 – 6.98 (m, 6H), 6.68 – 6.64 (m,  $J = 7.3$  Hz, 1H), 6.42 – 6.38 (m, 2H), 4.88 (s, 1H), 4.54 (dd,  $J = 11.4, 2.4$  Hz, 1H), 3.63 (dd,  $J = 17.2, 11.4$  Hz, 1H), 3.32 (dd,  $J = 17.2, 2.5$  Hz, 1H), 2.26 (s, 1H), 2.02 (s, 1H), 1.80 – 1.70 (m, 6H), 1.57 – 1.47 (m, 6H);  $^{13}\text{C}$  NMR (100 MHz,  $\text{CDCl}_3$ )  $\delta$  197.8, 171.3, 146.1, 137.7, 136.9, 136.9, 135.4, 132.9, 129.7, 128.9, 128.8, 128.5, 128.4, 128.0, 128.0, 127.5, 117.6, 115.9, 82.4, 70.3, 49.1, 40.9, 40.7, 36.0, 30.7, 21.1; FT-IR(KBr)  $\tilde{\nu}$  3402, 3053, 2912, 2851, 1727, 1688, 1600, 1511, 1502, 1446, 1355, 1315, 1250, 1177, 1954, 966, 750, 733, 698  $\text{cm}^{-1}$ ; HRMS(ESI)  $m/z$ : calcd. for  $\text{C}_{39}\text{H}_{38}\text{NO}_3\text{NaBr}$  ( $\text{M}+\text{Na}$ ) $^+$  670.1933, found 670.1929; HPLC (CHIRALCEL OD-H,  $\lambda = 254$  nm, hexane/2-propanol = 99/1, Flow rate = 1.0 mL/min), 78% ee,  $t_{\text{major}} = 5.00$  min,  $t_{\text{minor}} = 7.05$  min.

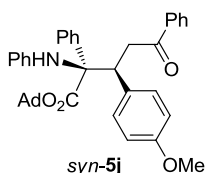

**(2S,3R)-adamantan-1-yl 3-(4-methoxyphenyl)-5-oxo-2,5-diphenyl-2-(phenylamino)pentanoate (5j).**

$^1\text{H}$  NMR (400 MHz,  $\text{CDCl}_3$ )  $\delta$  7.73 – 7.61 (m, 4H), 7.49 – 7.44 (m, 1H), 7.37 – 7.30 (m, 5H), 7.09 – 7.00 (m, 4H), 6.77 – 6.72 (m, 2H), 6.69 – 6.63 (m, 1H), 6.40 (d,  $J = 7.8$  Hz, 2H), 4.88 (s, 1H), 4.54 (dd,  $J = 11.4, 2.3$  Hz, 1H), 3.74 (s, 3H), 3.60 (dd,  $J = 17.1, 11.5$  Hz, 1H), 3.33 (dd,  $J = 17.1, 2.5$  Hz, 1H), 2.02 (s, 3H), 1.77 (q,  $J = 11.6$  Hz, 6H), 1.57 – 1.48 (d,  $J = 3.6$  Hz, 6H);  $^{13}\text{C}$  NMR (100 MHz,  $\text{CDCl}_3$ )  $\delta$  197.9, 171.3, 158.8, 146.0, 137.6, 136.9, 133.0, 130.9, 130.5, 128.9, 128.5, 128.5, 128.1, 128.0, 127.5, 117.6, 115.9, 113.4, 82.4, 70.4, 55.1, 48.7, 41.0, 40.7, 36.0, 30.7; FT-IR(KBr)  $\tilde{\nu}$  3372, 3056, 2912, 2852, 1722, 1677, 1599, 1513, 1501, 1446, 1344, 1229, 1179, 1110, 1049, 857, 753, 711, 690  $\text{cm}^{-1}$ . HRMS(ESI)  $m/z$ : calcd. for  $\text{C}_{40}\text{H}_{41}\text{NO}_4\text{Na}$  ( $\text{M}+\text{Na}$ ) $^+$  622.2933, found 622.2912; HPLC (CHIRALCEL OD-H,  $\lambda = 254$  nm, hexane/2-propanol = 150/6, Flow rate = 1.0 mL/min), 62% ee,  $t_{\text{major}} = 5.50$  min,  $t_{\text{minor}} = 7.26$  min.

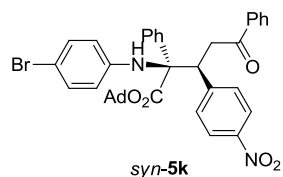

**(2S,3R)-adamantan-1-yl**

**2-((4-bromophenyl)amino)-3-(4-nitrophenyl)-5-oxo-2,5-diphenylpentanoate (5k).**

$^1\text{H}$  NMR (400 MHz,  $\text{CDCl}_3$ )  $\delta$  8.07 (d,  $J = 8.8$  Hz, 2H), 7.74 – 7.66 (m, 1H), 7.54 – 7.46 (m, 3H), 7.42 – 7.30 (m, 7H), 7.19 – 7.12 (m, 2H), 6.32 (d,  $J = 8.9$  Hz, 2H), 5.00 (s, 1H), 4.82 (dd,  $J = 2.4$  Hz, 1H), 3.66 (dd,  $J = 17.6, 11.2$  Hz, 1H), 3.54 (dd,  $J = 17.6, 2.6$  Hz, 1H), 2.07 (s, 3H), 1.86 – 1.70 (m, 6H), 1.64 – 1.46 (m, 6H);  $^{13}\text{C}$  NMR (100 MHz,  $\text{CDCl}_3$ )  $\delta$  199.0, 170.4, 147.2, 146.7, 144.3, 136.3, 133.6, 131.5, 130.9, 128.7, 128.6, 128.2, 128.2, 127.9, 123.0, 117.5, 109.9, 83.6, 77.4, 77.1, 76.7, 69.9, 48.1, 40.9, 35.9, 30.7; FT-IR(KBr)  $\tilde{\nu}$  3399, 2912, 2853, 1725, 1690, 1597, 1514, 1448, 1346, 1234, 1183, 1107, 1050, 857, 812, 734, 691  $\text{cm}^{-1}$ ; HRMS(ESI)  $m/z$ : calcd. for  $\text{C}_{39}\text{H}_{37}\text{N}_2\text{O}_5\text{NaBr}$  ( $\text{M}+\text{Na}$ ) $^+$  715.1784, found 715.1768; HPLC (CHIRALPAK IC,  $\lambda = 254$  nm, hexane/2-propanol = 98/2, Flow rate = 1.0 mL/min), 84% ee,  $t_{\text{major}} = 16.95$  min,  $t_{\text{minor}} = 18.51$  min.

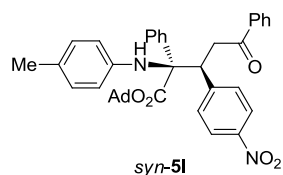

**(2S,3R)-adamantan-1-yl 3-(4-nitrophenyl)-5-oxo-2,5-diphenyl-2-(p-tolylamino)pentanoate (5l).**

$[\alpha]_{\text{D}}^{20} = -74.2$  ( $c = 0.3283$ ,  $\text{CHCl}_3$ );  $^1\text{H}$  NMR (400 MHz,  $\text{CDCl}_3$ )  $\delta$  8.06 (d,  $J = 8.8$  Hz, 2H), 7.75 – 7.66 (m, 2H), 7.57 – 7.53 (m, 2H), 7.53 – 7.46 (m, 1H), 7.40 – 7.32 (m, 7H), 6.90 (d,  $J = 8.2$  Hz, 2H), 6.37 (d,  $J = 8.5$  Hz, 2H), 4.87 – 4.78 (m, 2H), 3.67 (dd,  $J = 17.7, 11.2$  Hz, 1H), 3.57 (dd,  $J = 17.7, 2.7$  Hz, 1H), 2.22 (s, 3H), 2.05 (s, 3H), 1.85 – 1.69 (m, 6H), 1.60 – 1.48 (m, 6H);  $^{13}\text{C}$  NMR (100 MHz,  $\text{CDCl}_3$ )  $\delta$  197.2, 170.8, 147.1, 147.1, 142.9, 137.2, 136.4, 133.4, 131.0, 129.3, 128.6, 128.5, 128.4, 127.9, 127.2, 122.9, 116.1, 83.2, 77.3, 77.0, 76.7, 70.0, 48.0, 41.1, 40.8, 35.9, 30.7, 20.4; FT-IR(KBr)  $\tilde{\nu}$  3389, 3060, 2911, 2853, 1725, 1690, 1594, 1524, 1493, 1447, 1346, 1319, 1295, 1253, 1234, 1180, 1105, 1049, 908, 857, 816, 734, 690  $\text{cm}^{-1}$ ; HRMS(ESI)  $m/z$ : calcd. for  $\text{C}_{40}\text{H}_{40}\text{N}_2\text{O}_5\text{Na}$  ( $\text{M}+\text{Na}$ ) $^+$  651.2835, found 651.2805; HPLC (CHIRALPAK IC,  $\lambda = 254$  nm, hexane/2-propanol = 98/2, Flow rate = 1.0 mL/min), 90% ee,  $t_{\text{major}} = 14.58$  min,  $t_{\text{minor}} = 18.90$  min.

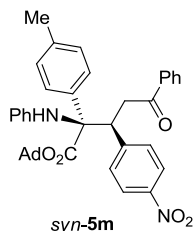

**(2S,3R)-adamantan-1-yl 3-(4-nitrophenyl)-5-oxo-5-phenyl-2-(phenylamino)-2-(p-tolyl)pentanoate (5m).**

$^1\text{H}$  NMR (400 MHz,  $\text{CDCl}_3$ )  $\delta$  8.06 (d,  $J = 8.8$  Hz, 2H), 7.88 – 7.78 (m, 2H), 7.59 – 7.50 (m, 1H), 7.46 – 7.38 (m, 2H), 7.34 (d,  $J = 8.2$  Hz, 2H), 7.28 – 7.20 (m, 2H), 7.11 (d,  $J = 8.1$  Hz, 2H), 7.02 – 6.93 (m,

2H), 6.73 – 6.62 (m, 1H), 6.36 (d,  $J = 7.9$  Hz, 1H), 4.65 (s, 1H), 4.58 (dd,  $J = 8.6, 4.3$  Hz, 1H), 3.73 (dd,  $J = 18.4, 4.3$  Hz, 1H), 3.37 (dd,  $J = 18.4, 8.7$  Hz, 1H), 2.37 (s, 3H), 2.07 (br, 3H), 1.93 – 1.76 (m, 6H), 1.63 – 1.48 (m, 6H);  $^{13}\text{C}$  NMR (100 MHz,  $\text{CDCl}_3$ )  $\delta$  198.2, 170.5, 147.2, 146.8, 145.8, 137.7, 136.6, 133.5, 132.9, 131.3, 129.3, 128.7, 128.5, 128.4, 128.0, 122.8, 119.0, 116.3, 82.9, 70.7, 49.4, 41.1, 39.9, 36.0, 30.8, 21.1; HRMS(ESI)  $m/z$ : calcd. for  $\text{C}_{40}\text{H}_{40}\text{N}_2\text{O}_5\text{Na}$  ( $\text{M}+\text{Na}$ ) $^+$  651.2835, found 651.2825; HPLC (CHIRALPAK IC,  $\lambda = 254$  nm, hexane/2-propanol = 98/2, Flow rate = 1.0 mL/min), 88% ee,  $t_{\text{major}} = 14.78$  min,  $t_{\text{minor}} = 18.47$  min.

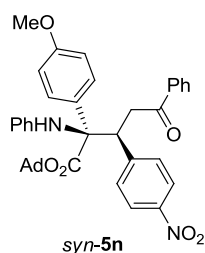

**(2S,3R)-adamantan-1-yl**

**-(4-methoxyphenyl)-3-(4-nitrophenyl)-5-oxo-5-phenyl-2-(phenylamino)pentanoate (5n).**

$^1\text{H}$  NMR (400 MHz,  $\text{CDCl}_3$ )  $\delta$  8.07 (d,  $J = 8.7$  Hz, 2H), 7.74 – 7.67 (m, 2H), 7.55 – 7.43 (m, 3H), 7.40 – 7.32 (m, 4H), 7.14 – 7.04 (m, 2H), 6.89 (d,  $J = 9.0$  Hz, 2H), 6.76 – 6.68 (m, 1H), 6.46 (d,  $J = 7.9$  Hz, 2H), 4.77 (dd,  $J = 11.1, 2.3$  Hz, 1H), 3.83 (s, 3H), 3.66 (dd,  $J = 17.7, 11.2$  Hz, 1H), 3.56 (dd,  $J = 17.7, 2.6$  Hz, 1H), 2.06 (s, 3H), 1.86 – 1.73 (m, 6H), 1.61 – 1.49 (m, 6H);  $^{13}\text{C}$  NMR (100 MHz,  $\text{CDCl}_3$ )  $\delta$  197.2, 171.0, 159.2, 147.1, 147.0, 145.4, 136.40, 133.4, 130.9, 129.7, 128.8, 128.6, 127.9, 122.9, 118.1, 116.0, 114.1, 113.7, 83.2, 69.6, 55.3, 49.2, 48.4, 41.0, 40.8, 35.9, 30.7; FT-IR(KBr)  $\tilde{\nu}$  3400, 3055, 2912, 2856, 1727, 1598, 1512, 1500, 1446, 1349, 1250, 1177, 954, 965, 754, 733, 699  $\text{cm}^{-1}$ ; HRMS(ESI)  $m/z$ : calcd. for  $\text{C}_{40}\text{H}_{40}\text{N}_2\text{O}_6\text{Na}$  ( $\text{M}+\text{Na}$ ) $^+$  667.2784, found 667.2788; HPLC (CHIRALPAK IC,  $\lambda = 254$  nm, hexane/2-propanol = 97/3, Flow rate = 1.0 mL/min), 92% ee,  $t_{\text{major}} = 20.00$  min,  $t_{\text{minor}} = 22.61$  min.

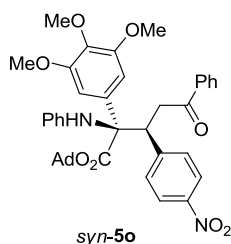

**(2S,3R)-adamantan-1-yl 3-(4-nitrophenyl)-5-oxo-5-phenyl-2-(phenylamino)-2-(3,4,5-trimethoxyphenyl)pentanoate (5o).**

$^1\text{H}$  NMR (400 MHz,  $\text{CDCl}_3$ )  $\delta$  8.10 (d,  $J = 10.5$  Hz, 2H), 7.69 (d,  $J = 7.4$  Hz, 2H), 7.52 (dd,  $J = 16.8, 9.4$  Hz, 1H), 7.46 – 7.32 (m, 4H), 7.19 – 7.06 (m, 2H), 6.84 (s, 2H), 6.79 – 6.71 (m, 1H), 6.52 (d,  $J = 11.8$  Hz, 2H), 4.89 (s, 1H), 4.79 (dd,  $J = 10.3, 2.8$  Hz, 1H), 3.89 (s, 3H), 3.70 (s, 6H), 3.69 – 3.55 (m, 2H), 2.14 – 2.02 (m, 3H), 1.86 – 1.71 (m, 6H), 1.65 – 1.48 (m, 6H);  $^{13}\text{C}$  NMR (100 MHz,  $\text{CDCl}_3$ )  $\delta$  197.3, 170.6, 153.0, 147.2, 145.3, 137.8, 133.5, 132.5, 131.0, 128.7, 128.7, 128.1, 127.9, 123.9, 123.0, 118.4, 116.3, 106.0, 83.4, 70.1, 61.0, 56.3, 41.2, 40.9, 35.9, 30.7; FT-IR(KBr)  $\tilde{\nu}$  3399, 2912, 2853, 1725, 1690, 1600, 1513, 1501, 1449, 1412, 1346, 1322, 1235, 1185, 1128, 1051, 1006, 857, 751, 693  $\text{cm}^{-1}$ ; HRMS(ESI)  $m/z$ : calcd. for  $\text{C}_{42}\text{H}_{44}\text{N}_2\text{O}_8\text{Na}$  ( $\text{M}+\text{Na}$ ) $^+$  727.2995, found 727.3010; HPLC (CHIRALPAK IC,  $\lambda = 254$  nm, hexane/2-propanol = 150/1, Flow rate = 1.0 mL/min), 40% ee,  $t_{\text{major}} =$

14.57 min,  $t_{\text{minor}} = 13.05$  min.

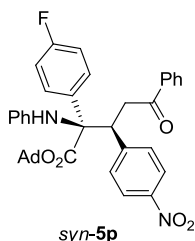

**(2S,3R)-adamantan-1-yl**

**2-(4-fluorophenyl)-3-(4-nitrophenyl)-5-oxo-5-phenyl-2-(phenylamino)pentanoate (5p).**

$[\alpha]_{\text{D}}^{20} = -80.1$  ( $c = 0.6133$ ,  $\text{CHCl}_3$ );  $^1\text{H NMR}$  (400 MHz,  $\text{CDCl}_3$ )  $\delta$  8.07 (d,  $J = 8.8$  Hz, 2H), 7.75 – 7.67 (m, 2H), 7.61 – 7.46 (m, 3H), 7.42 – 7.28 (m, 4H), 7.15 – 7.00 (m, 4H), 6.80 – 6.62 (m, 1H), 6.44 (d,  $J = 7.8$  Hz, 2H), 4.90 (s, 1H), 4.75 (dd,  $J = 11.2$ , 2.1 Hz, 1H), 3.68 (dd,  $J = 17.6$ , 11.4 Hz, 1H), 3.52 (dd,  $J = 17.6$ , 2.4 Hz, 1H), 2.06 (br, 3H), 1.86 – 1.68 (m, 6H), 1.64 – 1.46 (m, 6H);  $^{13}\text{C NMR}$  (100 MHz,  $\text{CDCl}_3$ )  $\delta$  196.9, 170.5, 163.6, 161.1, 147.2, 146.6, 145.1, 136.3, 133.6, 132.7, 130.9, 130.4, 130.3, 128.8, 128.7, 127.9, 123.0, 118.5, 116.0, 115.5, 115.3, 83.5, 69.6, 48.7, 40.9, 35.9, 30.8;  $^{19}\text{F NMR}$  (376 MHz,  $\text{CDCl}_3$ )  $\delta$  -114.05; FT-IR(KBr)  $\tilde{\nu}$  3395, 3057, 2913, 2853, 1725, 1690, 1600, 1558, 1513, 1502, 1448, 1346, 1318, 1230, 1161, 1103, 1050, 857, 751, 691  $\text{cm}^{-1}$ ; HRMS(ESI)  $m/z$ : calcd. for  $\text{C}_{39}\text{H}_{37}\text{N}_2\text{O}_5\text{FNa}$  ( $\text{M}+\text{Na}$ ) $^+$  655.2584, found 655.2582; HPLC (CHIRALPAK IC,  $\lambda = 254$  nm, hexane/2-propanol = 98/2, Flow rate = 1.0 mL/min), 92% ee,  $t_{\text{major}} = 18.32$  min,  $t_{\text{minor}} = 23.67$  min.

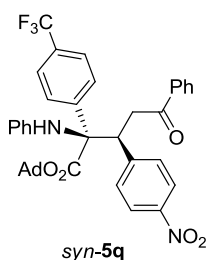

**(2S,3R)-adamantan-1-yl 3-(4-nitrophenyl)-5-oxo-5-phenyl-2-(phenylamino)-2-(4-(trifluoromethyl)phenyl)pentanoate (5q).**

$^1\text{H NMR}$  (400 MHz,  $\text{CDCl}_3$ )  $\delta$  8.08 (d,  $J = 8.8$  Hz, 2H), 7.78 – 7.67 (m, 4H), 7.66 – 7.60 (m, 2H), 7.55 – 7.47 (m, 1H), 7.41 – 7.29 (m, 4H), 7.10 (dd,  $J = 8.3$ , 7.5 Hz, 2H), 6.81 – 6.69 (m, 1H), 6.40 (d,  $J = 7.8$  Hz, 2H), 4.92 (s, 1H), 4.77 (dd,  $J = 11.2$ , 2.3 Hz, 1H), 3.67 (dd,  $J = 17.6$ , 11.3 Hz, 1H), 3.48 (dd,  $J = 17.6$ , 2.5 Hz, 1H), 2.11 – 2.01 (m, 3H), 1.88 – 1.68 (m, 6H), 1.65 – 1.42 (m, 6H);  $^{13}\text{C NMR}$  (100 MHz,  $\text{CDCl}_3$ )  $\delta$  196.7, 170.0, 147.3, 146.2, 144.8, 141.2, 136.2, 133.6, 130.8, 130.0, 129.1, 128.9, 128.8, 128.7, 128.6, 127.9, 125.3 (q,  $J = 6.8$  Hz), 124.2, 123.1, 118.7, 116.0, 83.91, 77.33, 77.0, 76.7, 69.9, 48.7, 40.8, 40.85, 35.8, 30.7;  $^{19}\text{F NMR}$  (376 MHz,  $\text{CDCl}_3$ )  $\delta$  -62.49; HRMS(ESI)  $m/z$ : calcd. for  $\text{C}_{40}\text{H}_{37}\text{N}_2\text{O}_5\text{Na}$  ( $\text{M}+\text{Na}$ ) $^+$  705.2552, found 705.2533; HPLC (CHIRALPAK IC,  $\lambda = 254$  nm, hexane/2-propanol = 98/2, Flow rate = 1.0 mL/min), 82% ee,  $t_{\text{major}} = 11.42$  min,  $t_{\text{minor}} = 14.10$  min.

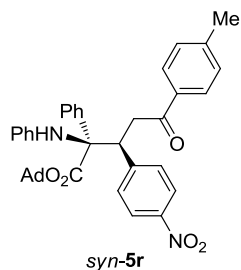

**(2S,3R)-adamantan-1-yl 3-(4-nitrophenyl)-5-oxo-2-phenyl-2-(phenylamino)-5-(p-tolyl)pentanoate (5r).**

$^1\text{H NMR}$  (400 MHz,  $\text{CDCl}_3$ )  $\delta$  8.06 (d,  $J = 8.8$  Hz, 2H), 7.63 – 7.51 (m, 4H), 7.41 – 7.32 (m, 5H), 7.16 (d,  $J = 8.0$  Hz, 2H), 7.09 (dd,  $J = 8.4, 7.4$  Hz, 2H), 6.77 – 6.67 (m, 1H), 6.45 (d,  $J = 7.8$  Hz, 2H), 4.93 (s, 1H), 4.82 (dd,  $J = 11.4, 2.4$  Hz, 1H), 3.66 (dd,  $J = 17.6, 11.4$  Hz, 1H), 3.54 (dd,  $J = 17.6, 2.6$  Hz, 1H), 2.35 (s, 3H), 2.09 – 2.05 (br, 3H), 1.77 (q,  $J = 11.4$  Hz, 6H), 1.60 – 1.47 (m, 6H);  $^{13}\text{C NMR}$  (100 MHz,  $\text{CDCl}_3$ )  $\delta$  196.8, 170.7, 147.1, 147.0, 145.3, 144.4, 137.0, 134.0, 131.0, 129.3, 128.8, 128.5, 128.3, 128.0, 128.0, 122.9, 118.1, 116.0, 83.3, 70.0, 48.9, 40.9, 40.8, 35.9, 30.7, 21.6; FT-IR(KBr)  $\tilde{\nu}$  3394, 3056, 2919, 2853, 1725, 1711, 1679, 1603, 1524, 1501, 1447, 1346, 1318, 1235, 1180, 1107, 1050, 964, 857, 815, 750, 697  $\text{cm}^{-1}$ ; HRMS(ESI)  $m/z$ : calcd. for  $\text{C}_{40}\text{H}_{40}\text{N}_2\text{O}_5\text{Na}$  ( $\text{M}+\text{Na}$ ) $^+$  651.2835, found 651.2815; HPLC (CHIRALPAK IC,  $\lambda = 254$  nm, hexane/2-propanol = 97/3, Flow rate = 1.0 mL/min), 94% ee,  $t_{\text{major}} = 15.44$  min,  $t_{\text{minor}} = 18.82$  min.

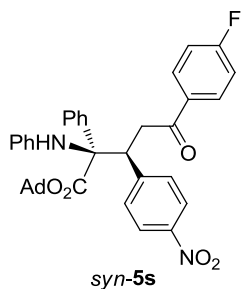

**(2R,3S)-adamantan-1-yl**

**5-(4-fluorophenyl)-3-(4-nitrophenyl)-5-oxo-2-phenyl-2-(phenylamino)pentanoate (5s)**

$[\alpha]_{\text{D}}^{20} = -79.1$  ( $c = 0.2033$ ,  $\text{CHCl}_3$ ),  $^1\text{H NMR}$  (400 MHz,  $\text{CDCl}_3$ )  $\delta$  8.08 (d,  $J = 8.7$  Hz, 1H), 7.79 – 7.67 (m, 1H), 7.61 – 7.51 (m, 1H), 7.44 – 7.31 (m, 1H), 7.15 – 7.06 (m, 1H), 7.06 – 6.97 (m, 1H), 6.79 – 6.68 (m, 1H), 6.46 (d,  $J = 7.9$  Hz, 1H), 4.94 (s, 1H), 4.83 (dd,  $J = 10.8, 2.9$  Hz, 1H), 3.64 (dd,  $J = 17.7, 10.9$  Hz, 1H), 3.56 (dd,  $J = 17.6, 3.0$  Hz, 1H), 2.05 (s, 1H), 1.86 – 1.63 (m, 1H), 1.58 – 1.46 (m, 1H);  $^{13}\text{C NMR}$  (100 MHz,  $\text{CDCl}_3$ )  $\delta$  195.6, 170.7, 165.9 (d,  $J = 255.7$  Hz), 147.2, 146.8, 145.3, 137.0, 132.8, 130.9, 130.6, 130.5, 128.8, 128.6, 128.2, 128.0, 122.9, 118.2, 116.0, 115.9, 115.7, 83.4, 77.4, 77.0, 76.7, 69.9, 48.0, 41.0, 40.801, 35.9, 30.7;  $^{19}\text{F NMR}$  (376 MHz,  $\text{CDCl}_3$ )  $\delta$  -104.26, -218.44; FT-IR(KBr)  $\tilde{\nu}$  3386, 3057, 2913, 2855, 1709, 1687, 1599, 1558, 1526, 1446, 1410, 1346, 1215, 1156, 1103, 1048, 993, 840, 748, 710  $\text{cm}^{-1}$ ; HRMS(ESI)  $m/z$ : calcd. for  $\text{C}_{39}\text{H}_{37}\text{N}_2\text{O}_3\text{FNa}$  ( $\text{M}+\text{Na}$ ) $^+$  655.2584, found 655.2598; HPLC (CHIRALPAK IC,  $\lambda = 254$  nm, hexane/2-propanol = 97/3, Flow rate = 1.0 mL/min), 94% ee,  $t_{\text{major}} = 12.04$  min,  $t_{\text{minor}} = 13.54$  min.

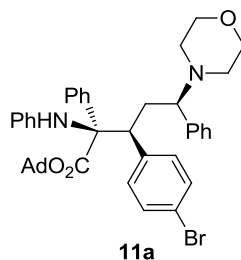

**(2R,3S,5R)-adamantan-1-yl 3-(4-bromophenyl)-5-morpholino-2,5-diphenyl-2-(phenylamino)pentanoate (11a).**

$[\alpha]_D^{20} = -43.0$  ( $c = 0.348$ ,  $\text{CHCl}_3$ );  $^1\text{H NMR}$  (400 MHz,  $\text{CDCl}_3$ )  $\delta$  7.67 (d,  $J = 3.9$  Hz, 2H), 7.35 (d,  $J = 8.3$  Hz, 2H), 7.32 – 7.26 (m, 3H), 7.22 (dt,  $J = 10.7$ , 4.0 Hz, 3H), 7.03 – 6.95 (m, 2H), 6.92 – 6.78 (m, 4H), 6.68 – 6.57 (m, 1H), 6.37 (d,  $J = 8.0$  Hz, 2H), 4.61 (s, 1H), 4.16 (d,  $J = 11.0$  Hz, 1H), 3.67 (t,  $J = 4.4$  Hz, 4H), 2.87 (dd,  $J = 11.7$ , 3.1 Hz, 1H), 2.54 (t,  $J = 12.0$  Hz, 1H), 2.35 – 2.20 (m, 2H), 2.03 (s, 3H), 1.98 – 1.89 (m, 2H), 1.83 (dd,  $J = 19.0$ , 7.1 Hz, 1H), 1.76 – 1.65 (m, 6H), 1.58 – 1.38 (m, 7H);  $^{13}\text{C NMR}$  (100 MHz,  $\text{CDCl}_3$ )  $\delta$  171.5, 145.9, 138.1, 137.5, 137.2, 131.9, 131.0, 129.6, 128.5, 128.4, 127.9, 127.5, 127.4, 121.2, 117.9, 115.7, 82.2, 77.3, 77.0, 76.7, 70.7, 67.6, 65.9, 52.1, 49.22, 40.80, 36.02, 32.0, 30.7; FT-IR(KBr)  $\tilde{\nu}$  3416, 3056, 3026, 1725, 1703, 1604, 1501, 1452, 1355, 1317, 1254, 1230, 1182, 1118, 1051, 1108, 967, 822, 751, 703, 553  $\text{cm}^{-1}$ ; HRMS(ESI)  $m/z$ : calcd. for  $\text{C}_{43}\text{H}_{48}\text{N}_2\text{O}_3\text{Br}$  ( $\text{M}+\text{Na}$ ) $^+$  719.2848, found 719.2876.

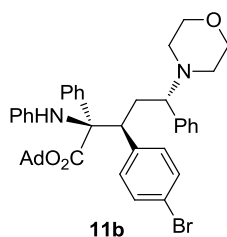

**(2R,3S,5S)-adamantan-1-yl 3-(4-bromophenyl)-5-morpholino-2,5-diphenyl-2-(phenylamino)pentanoate (11b).**

$^1\text{H NMR}$  (400 MHz,  $\text{CDCl}_3$ )  $\delta$  7.41 – 7.31 (m, 6H), 7.31 – 7.19 (m, 4H), 7.03 – 6.91 (m, 4H), 6.74 – 6.53 (m, 3H), 6.28 (d,  $J = 7.8$  Hz, 2H), 4.44 (s, 1H), 3.61 – 3.44 (m, 1H), 3.14 (d,  $J = 10.5$  Hz, 1H), 2.58 (dd,  $J = 11.2$ , 3.2 Hz, 1H), 2.41 (td,  $J = 12.9$ , 3.3 Hz, 1H), 2.26 – 2.12 (m, 3H), 2.11 – 2.02 (m, 2H), 1.99 (s, 3H), 1.66 – 1.56 (m, 6H), 1.56 – 1.43 (m, 6H);  $^{13}\text{C NMR}$  (100 MHz,  $\text{CDCl}_3$ )  $\delta$  171.0, 145.7, 139.4, 137.1, 136.5, 131.9, 131.0, 129.6, 129.1, 128.4, 128.3, 127.67, 127.5, 127.4, 121.5, 117.8, 115.7, 82.2, 77.3, 77.0, 76.7, 70.5, 68.6, 67.0, 51.4, 40.6, 36.0, 33.6, 30.7; FT-IR(KBr)  $\tilde{\nu}$  3390, 3059, 3026, 2955, 2911, 2852, 2812, 1713, 1604, 1500, 1450, 1258, 1233, 1181, 1119, 1054, 1010, 876, 821, 759, 703, 547  $\text{cm}^{-1}$ ; HRMS(ESI)  $m/z$ : calcd. for  $\text{C}_{43}\text{H}_{48}\text{N}_2\text{O}_3\text{Br}$  ( $\text{M}+\text{Na}$ ) $^+$  719.2848, found 719.2833.

## Supplementary References

1. G. L. Hamilton, E. J. Kang, M. Mba, F. D. Toste. A powerful chiral counterion strategy for asymmetric transition metal catalysis. *Science* **317**, 496-499 (2007).
2. K. Aikawa, M. Kojima, K. Mikami. Axial Chirality Control of Gold(biphep) Complexes by Chiral Anions: Application to Asymmetric Catalysis. *Angew. Chem. Int. Ed.* **48**, 6073(2009).
3. Gaussian 09, Revision B.01, Frisch, M. J.; Trucks, G. W.; Schlegel, H. B.; Scuseria, G. E.; Robb, M. A.; Cheeseman, J. R.; Scalmani, G.; Barone, V.; Mennucci, B.; Petersson, G. A.; Nakatsuji, H.; Caricato, M.; Li, X.; Hratchian, H. P.; Izmaylov, A. F.; Bloino, J.; Zheng, G.; Sonnenberg, J. L.; Hada, M.; Ehara, M.; Toyota, K.; Fukuda, R.; Hasegawa, J.; Ishida, M.; Nakajima, T.; Honda, Y.; Kitao, O.; Nakai, H.; Vreven, T.; Montgomery, J. A., Jr.; Peralta, J. E.; Ogliaro, F.; Bearpark, M.; Heyd, J. J.; Brothers, E.; Kudin, K. N.; Staroverov, V. N.; Kobayashi, R.; Normand, J.; Raghavachari, K.; Rendell, A.; Burant, J. C.; Iyengar, S. S.; Tomasi, J.; Cossi, M.; Rega, N.; Millam, N. J.; Klene, M.; Knox, J. E.; Cross, J. B.; Bakken, V.; Adamo, C.; Jaramillo, J.; Gomperts, R.; Stratmann, R. E.; Yazyev, O.; Austin, A. J.; Cammi, R.; Pomelli, C.; Ochterski, J. W.; Martin, R. L.; Morokuma, K.; Zakrzewski, V. G.; Voth, G. A.; Salvador, P.; Dannenberg, J. J.; Dapprich, S.; Daniels, A. D.; Farkas, Ö.; Foresman, J. B.; Ortiz, J. V.; Cioslowski, J.; Fox, D. J. Gaussian, Inc., Wallingford CT (2009).
4. Zhao, Y.; Truhlar, D. G. The M06 suite of density functionals for main group thermochemistry, thermochemical kinetics, noncovalent interactions, excited states, and transition elements: two new functionals and systematic testing of four M06-class functionals and 12 other functionals. *Theor. Chem. Acc.* **120**, 215-241(2008).
5. Hay, P. J.; Wadt, W. R. Ab initio effective core potentials for molecular calculations - potentials for K to Au including the outermost core orbitals. *J. Chem. Phys.* **82**, 299-310 (1985).
6. Scalmani, G.; Frisch, M. J. Continuous surface charge polarizable continuum models of solvation. I. General formalism. *J. Chem. Phys.* **132**, 114110 (2010).
